# Supplementary material for: Increasing Notch signaling antagonizes PRC2-mediated silencing to promote reprograming of germ cells into neurons
Source: eLife. 2016 Sep 7;5:e15477. doi: 10.7554/eLife.15477 (PMC5045294; doi:10.7554/eLife.15477)
Supplement: Figure 1—source data 1. — (A) Quantification of GeCo+ phenotype upon RNAi against lin-53 in glp-1(ar202) mutants. (B) Quantification of GeCo dependency on LAG-1. (C) Quantification of germ cells in glp-1 (ar202) gonads with our without lag-1 RNAi treatment. (D) Quantification of GeCo in different genetic backgrounds with highly proliferative germlines upon RNAi against lin-53. Figure 1—figure supplement 1A source data: Quantification of gfp-positive germ cells. Figure 1—figure supplement 2 source data: Quantification of germ cells in different genetic backgrounds with highly proliferative germlines. Figure 1—figure supplement 3A source data: Quantification of GeCo after cell cycle block with HU treatment. More details can be found in the corresponding figure legends. DOI: http://dx.doi.org/10.7554/eLife.15477.004 [file elife-15477-fig1-data1.xlsx]

## Sheet: all Figure 1 source data
Figure 1-source data 1A
wild type lin-53 RNAi
	none	GeCo+	GeCo	all animals (N)
Biol. Repl. 1	26	0	8	34
Biol. Repl. 2	26	2	10	38
Biol. Repl. 3	101	11	28	140
Biol. Repl. 4	133	3	35	171
glp-1(ar202) lin-53 RNAi
	none	GeCo+	GeCo	all animals (N)
Biol. Repl. 1	52	21	14	87
Biol. Repl. 2	84	19	18	121
Biol. Repl. 3	27	6	3	36
Biol. Repl. 4	113	14	10	137
Biol. Repl. 5	92	10	11	113
wild type mock RNAi
	none	GeCo+	GeCo	all animals (N)
Biol. Repl. 1	50	0	0	50
Biol. Repl. 2	34	0	0	34
Biol. Repl. 3	107	0	0	107
Biol. Repl. 4	78	0	0	78
glp-1(ar202) mock RNAi
	none	GeCo+	GeCo	all animals (N)
Biol. Repl. 1	32	0	0	32
Biol. Repl. 2	45	0	0	45
Biol. Repl. 3	111	0	0	111
Biol. Repl. 4	23	0	0	23
Stat.	mock		lin-53 RNAi
	glp-1(ar202)	wt	glp-1(ar202)	wt
none	100	100	73.6179	73.7031
STDEV	0	0	3.74517	1.84723	p-value
GeCo+	0	0	15.1151	3.71867	0.0001	Student's t-test
STDEV	0	0	2.42811	1.52478	p-value
GeCo	0	0	11.267	22.5783	0.0006	Student's t-test
STDEV	0	0	1.58749	1.27415
Figure 1-source data 1B
glp-1(ar202) mock+lin-53 RNAi
	none	GeCo+	GeCo	all animals (N)		none	>10	<10
Biol. Repl. 1	52	21	14	87		0.597701	0.241379	0.16092
Biol. Repl. 2	27	6	3	36		0.75	0.166667	0.0833333
Biol. Repl. 3	127	9	8	144		0.881944	0.0625	0.0555556
						74.3215	15.6849	9.99361
						6.7054	4.23523	2.57429
glp-1(ar202) lag-1+lin-53 RNAi
	none	GeCo+	GeCo	all animals (N)		none	>10	<10
Biol. Repl. 1	32	3	2	37		0.864865	0.0810811	0.0540541
Biol. Repl. 2	333	2	3	338		0.985207	0.00591716	0.00887574
Biol. Repl. 3	50	0	3	53		0.943396	0	0.0566038
Biol. Repl. 4	49	0	2	51		0.960784	0	0.0392157
						93.8563	2.17496	3.96873	p1	< 0,0001	Student's T-test
						2.25336	1.71701	0.94939	p2	0.0018	Student's T-test
Figure 1-source data 1C
number of nuclei until gonadal turm in one gonadal arm
gonad #	glp-1(gf) empty vector	glp-1(gf) lag-1
1	276	340
2	470	290
3	180	358
4	279	239
5	259	300
6	237	254
7	274	319
8	256	206
9	257	213
10	334	354
11	324	206
12	319	229
13	328	263
14	277	285
15	380	156
16	257	164
17	195	509
18	257	291
19	229	381
20	249	194
	281.85	277.55	Average
	120.624	82.6937	Standard error
	60.3122	41.3468	p-value 0,89	Student's T-test
Figure 1-source data 1D
	mock RNAi					mock RNAi					mock RNAi
	gld-1, gld-2/++; glp-1/+					gld-1, gld-2; glp-1					gld-1, gld-2; glp-1/+
	GeCo	no GeCo	all animals (N)			GeCo	no GeCo	all animals (N)			GeCo	no GeCo	all animals (N)
Biol. Repl. 1	0	309	309		Biol. Repl. 1	0	22	22		Biol. Repl. 1	0	10	10
Biol. Repl. 2	0	249	249		Biol. Repl. 2	0	43	43		Biol. Repl. 2	0	47	47
Biol. Repl. 3	0	167	167		Biol. Repl. 3	0	25	25		Biol. Repl. 3	0	35	35
Biol. Repl. 4	0	100	100		Biol. Repl. 4	0	19	19		Biol. Repl. 4	0	13	13
Biol. Repl. 5	0	299	299		Biol. Repl. 5	0	30	30
	mock RNAi					mock RNAi					mock RNAi
	gld-1, gld-2/++; glp-1/+					gld-1, gld-2; glp-1					gld-1, gld-2; glp-1/+
	GeCo	no GeCo	standard error			GeCo	no GeCo	standard error			GeCo	no GeCo	standard error
	0	1				0	1				0	1
	0	1				0	1				0	1
	0	1				0	1				0	1
	0	1				0	1				0	1
	0	1				0	1
	0		0			0		0			0		0
	lin-53 RNAi					lin-53 RNAi					lin-53 RNAi
	gld-1, gld-2/++; glp-1/+					gld-1, gld-2; glp-1					gld-1, gld-2; glp-1/+
	GeCo	no GeCo	all animals (N)			GeCo	no GeCo	all animals (N)			GeCo	no GeCo	all animals (N)
Biol. Repl. 1	59	331	390		Biol. Repl. 1	2	43	45		Biol. Repl. 1	3	13	16
Biol. Repl. 2	77	326	403		Biol. Repl. 2	7	50	57		Biol. Repl. 2	21	45	66
Biol. Repl. 3	26	135	161		Biol. Repl. 3	2	58	60		Biol. Repl. 3	10	37	47
Biol. Repl. 4	60	307	367		Biol. Repl. 4	0	23	23		Biol. Repl. 4	9	22	31
					Biol. Repl. 5	3	46	49
	lin-53 RNAi					lin-53 RNAi					lin-53 RNAi
	gld-1, gld-2/++; glp-1/+					gld-1, gld-2; glp-1					gld-1, gld-2; glp-1/+
	GeCo	no GeCo	standard error			GeCo	no GeCo	standard error			GeCo	no GeCo	standard error
	0.151282	0.848718				0.0444444	0.955556				0.1875	0.8125
	0.191067	0.808933				0.122807	0.877193				0.318182	0.681818
						0.0333333	0.966667				0.212766	0.787234
	0.285714	0.838509				0	1				0.290323	0.709677
	0.19544	0.836512				0.0612245	0.938776
	20.5876		2.46004			5.23619		1.81192			25.2193		2.68655
					Student's t-test		p1=	0.0478		Student's t-test		p2=	0.0201
	mock	lin-53 RNAi
gld-1, gld-2; glp-1/+	0	25.2193
	0	2.68655
gld-1, gld-2; glp-1	0	5.23619
	0	1.81192
gld-1, gld-2/++; glp-1/+	0	20.5876
	0	2.46004
Figure 1–figure supplement 1A source data
glp-1 (ar202) + lin-53 RNAi
gcy-5::gfp-positive nuclei in the gonadal arm
counts/1 gonadal arm
1 arm = 1 sample
glp-1 + lin-53	n = 106 arms
19	15	15	18	32	46	45	66	15	20
78	23	13	51	68	68	30	18	11	18
23	42	23	18	32	19	11	24	20	16
11	30	12	11	13	15	30	28	22	14
47	18	44	28	16	28	12	18	72	42
12	13	20	16	28	13	55	20	49	51
21	39	49	12	19	51	12	20	26	13
24	47	32	39	12	32	15	13	20	20
24	34	16	25	17	14	24	34	47	48
45	41	16	14	42	35	51	38	24	20
17	36	13
27.9223	mean	15.6035	smodch
lin-53 alone	n = 75 arms
12	18	17	19	19	8	3	18	10	10
5	6	8	11	11	12	17	3	24	21
26	8	7	8	7	21	20	10	15	8
18	8	2	12	6	9	3	3	14	17
6	20	4	28	6	15	14	16	5	8
7	7	10	13	6	7	2	20	20	11
13	7	10	10	11	12	4	3	16	9
2	10	11	6	18
11.2133	mean	6.1151	smodch
Figure 1–figure supplement 2 source data
number of nuclei until gonadal turm in one gonadal arm
15 gonads counted until gonadal turn
gld-1(q485) gld-2(q497)	gld-1(q485) gld-2(q497) glp-1(q175)	wt
292	418	308
249	388	215
480	243	202
699	325	172
518	212	192
548	157	315
315	271	310
373	235	257
489	217	250
483	353	224
322	726	210
361	537	304
332	246	279
262	240	267
292	311	165
401	325.267	244.667	Average
100.307	142.175	49.8901	Standard deviation
50.1537	71.0874	24.9451
Figure 1–figure supplement 3A source data
lin-53 RNAi no HU	none	GeCo+	GeCo	all animals (N)		lin-53 RNAi+HU	none	GeCo+	GeCo	all animals (N)
Biol. Repl. 1	23	18	19	60		Biol. Repl. 1	8	1	8	17
Biol. Repl. 2	50	13	21	84		Biol. Repl. 2	23	20	16	59
Biol. Repl. 3	127	26	39	192		Biol. Repl. 3	41	12	22	75
percentage	none	GeCo+	GeCo			percentage	none	GeCo+	GeCo
	0.383333	0.3	0.316667				0.470588	0.0588235	0.470588
	0.595238	0.154762	0.25				0.389831	0.338983	0.271186
	0.661458	0.135417	0.203125				0.546667	0.16	0.293333
	54.6677	19.6726	25.6597				46.9028	18.5936	34.5036
	6.84869	4.24072	2.68972				3.69721	6.68777	5.15216
	lin-53	lin-53 + HU
none	54.6677	46.9028
STDEV	6.84869	3.69721		p-value(GeCo+)	0.458385
GeCo+	19.6726	18.5936		p-value(GeCo)	0.14097
STDEV	4.24072	6.68777
GeCo	25.6597	34.5036
STDEV	2.68972	5.15216
