# Supplementary material for: Increasing Notch signaling antagonizes PRC2-mediated silencing to promote reprograming of germ cells into neurons
Source: eLife. 2016 Sep 7;5:e15477. doi: 10.7554/eLife.15477 (PMC5045294; doi:10.7554/eLife.15477)
Supplement: Figure 2—source data 1. — (A) Microarray results of differentially expressed genes in Notch ON/OFF gonads. Figure 2—figure supplement 3 source data: Quantification of germlines with wild-type morphology versus germlines with tumors upon germline-autonomous RNAi against genetic interactors of PRC2. More details can be found in the corresponding figure legends. DOI: http://dx.doi.org/10.7554/eLife.15477.009 [file elife-15477-fig2-data1.xlsx]

## Sheet: Figure 2-source data 2A
Figure 2-source data 2A
WB_ID	Gene_Public_Name	Chrom	FC_NotchON_vs_OFF_both	FC_mes.2,unc.4_vs_unc.4	FC_mes.6,dpy.20_vs_dpy.20
WBGene00000001	aap-1	I	0.286419	0.0047383	0.137788
WBGene00000002	aat-1	IV	0.123974	0.0403625	0.03287
WBGene00000003	aat-2	V	-0.00449699	0.780497	0.882412
WBGene00000004	aat-3	X	0.0071744	-0.145674	-0.210809
WBGene00000005	aat-4	IV	0.00588062	-0.0253415	-0.0161526
WBGene00000006	aat-5	I	0.0510137	-0.0855098	-0.0824293
WBGene00000007	aat-6	V	0.227813	0.954545	0.629535
WBGene00000008	aat-7	II	-0.0757067	-0.10487	-0.0266511
WBGene00000009	aat-8	IV	0.105481	-0.0461187	0.00523136
WBGene00000010	aat-9	I	0.146899	-0.283528	-0.0301084
WBGene00000015	abf-4	V	0.109991	-0.2006	0.176016
WBGene00000016	abf-5	X	0.0684316	-0.104025	-0.0045386
WBGene00000017	abf-6	X	0.0459248	-0.101575	0.112806
WBGene00000018	abl-1	X	0.00322651	-0.653804	-0.776529
WBGene00000019	abt-1	IV	0.0777743	-0.0295392	-0.0267153
WBGene00000020	abt-2	I	-0.0355796	0.319582	0.229493
WBGene00000021	abt-3	IV	-0.0349857	-0.0427085	-0.0428788
WBGene00000022	abt-4	V	0.244092	-0.0960702	-0.0993771
WBGene00000023	abt-5	I	0.0130764	-0.00669337	0.0475564
WBGene00000025	abu-2	X	0.00266492	0.121004	-0.129039
WBGene00000026	abu-3	X	0.173711	0.0119957	-0.254419
WBGene00000027	abu-4	V	0.113488	0.044757	-0.200678
WBGene00000031	abu-8	V	0.387083	0.0727865	-0.0240717
WBGene00000033	abu-10	X	0.136518	0.00954184	-0.264967
WBGene00000034	abu-11	II	0.194452	0.0878814	-0.210965
WBGene00000035	ace-1	X	-0.0156262	-0.108318	0.0540888
WBGene00000036	ace-2	I	-0.0440394	0.361466	0.163448
WBGene00000037	ace-3	II	-0.15791	0.165376	-0.0598914
WBGene00000038	ace-4	II	-0.0506993	-0.0218742	-0.0970613
WBGene00000039	acn-1	X	-0.140239	-0.142179	0.209639
WBGene00000040	aco-1	X	0.310178	0.205892	0.165611
WBGene00000041	aco-2	III	-0.0804542	-0.219554	0.0395239
WBGene00000042	acr-2	X	-0.00905329	-0.162627	-0.060929
WBGene00000043	acr-3	X	-0.0984259	-0.0836292	-0.0559813
WBGene00000044	acr-5	III	-0.0416937	0.308424	0.273119
WBGene00000045	acr-6	I	-0.0616219	0.00965048	-0.103259
WBGene00000046	acr-7	II	0.00111473	0.00886141	0.0307367
WBGene00000047	acr-8	X	0.0266154	-0.0934075	-0.0865802
WBGene00000048	acr-9	X	0.0915722	0.149814	0.0776649
WBGene00000049	acr-10	X	0.0884941	0.00555507	-0.102153
WBGene00000050	acr-11	I	0.0691194	0.0276456	0.0363723
WBGene00000051	acr-12	X	-0.0371719	0.0886892	-0.0225875
WBGene00000053	acr-14	II	-0.0126861	0.0993403	0.0881265
WBGene00000054	acr-15	V	-0.0715543	-0.176914	-0.0156859
WBGene00000055	acr-16	V	-0.0556179	0.336043	0.567352
WBGene00000056	acr-17	V	0.0963462	0.140195	0.254102
WBGene00000057	acr-18	V	0.390593	1.8101	1.67289
WBGene00000058	acr-19	I	-0.0110375	0.102678	0.171992
WBGene00000059	acr-20	II	-0.0433818	-0.0321938	-0.211938
WBGene00000060	acr-21	III	-0.0665214	0.0143387	0.0223105
WBGene00000061	lgc-11	X	-0.140155	0.103138	0.0197794
WBGene00000062	acr-23	V	0.0793194	0.0143434	-0.0124394
WBGene00000064	act-2	V	0.247825	0.0476017	-0.0385074
WBGene00000066	act-4	X	0.378319	-0.0827503	0.362276
WBGene00000067	act-5	III	0.306844	-0.161592	-0.321219
WBGene00000068	acy-1	III	-0.0878474	1.68155	1.78331
WBGene00000069	acy-2	V	0.0148158	-0.0195913	0.0590639
WBGene00000070	acy-3	III	-0.0656134	0.196302	0.164846
WBGene00000071	acy-4	V	0.0105353	-0.00446899	0.112586
WBGene00000072	add-1	X	-0.00170145	0.10425	-0.0199847
WBGene00000073	add-2	V	0.0471488	0.0249753	0.105892
WBGene00000074	adm-2	X	0.389627	0.354597	0.0207322
WBGene00000075	adm-4	X	0.0902865	1.45341	1.11524
WBGene00000079	adr-1	I	0.14164	0.0407839	-0.0782948
WBGene00000080	adr-2	III	-0.139449	-0.0628164	-0.0652323
WBGene00000081	ads-1	III	0.0867484	-0.14095	-0.249372
WBGene00000082	adt-1	X	0.0323865	-0.0264114	-0.0456207
WBGene00000083	adt-2	X	0.000275282	-0.0824249	-0.404
WBGene00000084	aex-1	I	0.0146546	0.031158	0.0216148
WBGene00000086	aex-3	X	0.000391127	0.134748	-0.0982279
WBGene00000088	aex-5	I	-0.0224828	-0.0996221	-0.0425321
WBGene00000089	aex-6	I	-0.147665	-0.660361	-0.170598
WBGene00000090	age-1	II	-0.268736	-0.148318	-0.206606
WBGene00000093	agt-1	IV	0.249598	0.164762	-0.287488
WBGene00000094	agt-2	II	-0.158337	-0.145398	-0.191209
WBGene00000095	aha-1	I	0.0648936	0.332298	0.0994527
WBGene00000096	ahr-1	I	-0.139923	0.188474	0.553165
WBGene00000097	aip-1	V	-0.0282925	0.0671805	0.0982651
WBGene00000098	air-1	V	0.281486	-0.00097607	-0.0177951
WBGene00000099	air-2	I	-0.327301	-0.201488	-0.0230852
WBGene00000100	ajm-1	X	-0.0482683	-0.116073	-0.0796353
WBGene00000101	aka-1	II	-0.218301	0.172277	0.0762241
WBGene00000102	akt-1	V	-0.0823732	-0.215848	-0.031865
WBGene00000103	akt-2	X	-0.0822543	-0.260158	0.341007
WBGene00000105	alg-1	X	0.0237876	-0.256727	-0.0524932
WBGene00000106	alg-2	II	0.0912465	1.38382	1.42995
WBGene00000107	alh-1	III	0.17803	0.300187	-0.051334
WBGene00000108	alh-2	V	-0.0625749	-0.0259742	-0.138373
WBGene00000109	alh-3	IV	-0.152316	-0.182716	-0.217477
WBGene00000110	alh-4	V	0.20053	-0.163085	-0.222732
WBGene00000111	alh-5	V	0.10669	0.133472	0.113655
WBGene00000112	alh-6	II	0.567724	-0.696361	-0.634768
WBGene00000113	alh-7	II	-0.184157	-0.0694659	-0.189002
WBGene00000114	alh-8	II	0.252328	-0.0256542	-0.295559
WBGene00000115	alh-9	III	-0.460708	-0.224341	-0.249233
WBGene00000116	alh-10	X	0.00258702	-0.0445883	0.0415964
WBGene00000117	alh-11	III	-0.0878547	0.220044	-0.000132632
WBGene00000118	alh-12	III	-0.0216993	0.0910244	-0.00628653
WBGene00000120	aly-1	IV	0.112626	0.886933	0.67812
WBGene00000121	aly-2	IV	0.18339	-0.355643	-0.112462
WBGene00000122	aly-3	IV	-0.0222789	-0.31858	-0.132463
WBGene00000123	ama-1	IV	0.167945	-0.114222	0.119374
WBGene00000133	amt-1	X	0.0286291	-0.0104904	-0.0246744
WBGene00000134	amt-2	IV	0.0556844	0.121785	-0.00974035
WBGene00000135	amt-3	II	0.0489498	-0.0170029	-0.109227
WBGene00000136	amt-4	X	-0.0178518	-0.0310087	-0.119592
WBGene00000137	amx-1	III	-0.00108741	0.656763	-0.14502
WBGene00000138	amx-2	I	-0.0265609	-0.176698	-0.156654
WBGene00000139	amx-3	V	-0.00826245	-0.0574528	-0.00827017
WBGene00000140	anc-1	I	0.00260927	-0.0845633	0.168309
WBGene00000142	aos-1	V	0.482338	-0.05475	-0.0910428
WBGene00000143	apc-2	III	0.141972	-0.124303	-0.0379407
WBGene00000144	apc-10	V	0.182509	-0.358296	-0.189121
WBGene00000145	apc-11	III	0.249112	0.221169	0.00424709
WBGene00000146	ape-1	V	0.463885	-0.0189308	0.00519968
WBGene00000147	aph-1	I	0.210318	0.035098	-0.0549608
WBGene00000148	aph-2	I	-0.0650334	0.162797	-0.158672
WBGene00000149	apl-1	X	0.140595	-0.286283	0.0673389
WBGene00000150	apm-1	I	0.0595634	0.314998	0.478444
WBGene00000151	apn-1	II	0.123059	0.00570762	0.0165977
WBGene00000155	app-1	I	0.0992117	-0.145634	-0.184048
WBGene00000156	apr-1	I	-0.286309	0.0312477	0.0222364
WBGene00000157	aps-2	X	0.854699	1.08251	0.716298
WBGene00000158	apg-1	I	0.0829904	0.152378	0.0909417
WBGene00000159	aps-1	V	0.0456909	-0.0580335	-0.478008
WBGene00000160	apb-1	III	0.22953	0.204845	-0.00470811
WBGene00000161	apa-2	X	1.22868	1.90059	1.8942
WBGene00000162	apd-3	II	0.254785	0.253709	0.101977
WBGene00000163	apb-3	I	0.0538443	0.0451097	0.140681
WBGene00000164	apm-3	X	2.1575	1.33458	0.580193
WBGene00000165	aps-3	I	-0.206459	-0.980695	-0.813478
WBGene00000166	apt-9	X	-0.00178858	0.0172543	0.00742536
WBGene00000168	apx-1	V	0.00392775	0.00913425	0.0745617
WBGene00000169	aqp-1	II	-0.117719	-0.105186	-0.087966
WBGene00000170	aqp-2	II	-0.305145	0.0793477	1.30301
WBGene00000171	aqp-3	IV	-0.171089	-0.0854828	0.0832727
WBGene00000172	aqp-4	V	0.181859	0.132457	-0.0049995
WBGene00000173	aqp-5	V	-0.0345587	0.0452999	-0.00965069
WBGene00000174	aqp-6	V	-0.0128964	0.0822039	0.13353
WBGene00000175	aqp-7	X	0.93993	-0.322013	-0.0111656
WBGene00000176	aqp-8	X	0.0768567	-0.000103032	-0.111813
WBGene00000177	aqp-9	I	0.00748568	-0.123961	-0.100458
WBGene00000178	aqp-10	II	0.482873	1.99383	1.03048
WBGene00000179	aqp-11	III	0.181087	-0.232405	-0.175084
WBGene00000180	arc-1	II	0.279954	0.194109	-0.111827
WBGene00000181	ard-1	IV	-0.127395	0.0311571	-0.156119
WBGene00000182	arf-1.2	III	0.105046	-0.00379285	0.0433115
WBGene00000183	arf-3	IV	0.0339518	0.148479	0.206628
WBGene00000184	arf-6	IV	-0.0169266	-0.353679	0.00796215
WBGene00000185	arg-1	X	0.0853444	-0.138091	-0.134344
WBGene00000186	ark-1	IV	0.15781	-0.236915	-0.354898
WBGene00000187	arl-1	II	-0.124341	-0.330732	-0.0546741
WBGene00000188	arl-3	II	0.0750376	-0.0552354	-0.0360759
WBGene00000189	arl-5	III	-0.0924265	-0.066095	0.00546308
WBGene00000192	arl-8	IV	0.192455	0.109471	0.225336
WBGene00000193	arl-6	III	-0.124348	0.0696405	-0.119245
WBGene00000195	arr-1	X	0.0802134	-0.263157	0.0840276
WBGene00000196	ars-1	II	-0.107207	-0.244481	-0.541918
WBGene00000197	ars-2	I	-0.204484	0.1011	-0.01766
WBGene00000198	art-1	II	0.318929	0.149819	-0.0432502
WBGene00000199	arx-1	I	0.423574	0.0927333	-0.00602031
WBGene00000200	arx-2	V	0.203302	0.183613	0.0453539
WBGene00000201	arx-3	III	0.158828	-0.0820012	-0.149464
WBGene00000202	exos-4.2	III	0.0288493	-0.610122	-0.271564
WBGene00000203	arx-5	III	0.0828638	-0.08051	0.021847
WBGene00000204	arx-6	III	0.355847	-0.0840423	-0.0192167
WBGene00000205	arx-7	I	-0.143	-0.169476	-0.0337894
WBGene00000206	asb-1	III	0.313386	0.156124	-0.0568202
WBGene00000207	asb-2	X	1.34125	0.8424	1.03412
WBGene00000208	asc-1	II	0.119825	-0.448637	-0.244609
WBGene00000209	asg-1	I	0.747105	-0.109231	-0.0434653
WBGene00000210	asg-2	X	0.707187	-0.0480413	-0.476752
WBGene00000211	asm-1	II	0.182009	0.000648863	0.0847418
WBGene00000212	asm-2	X	0.0434329	0.0579342	0.0915078
WBGene00000213	asm-3	IV	0.0389349	0.036075	-0.0254239
WBGene00000214	asp-1	V	0.517371	-0.129626	-0.200902
WBGene00000215	asp-2	V	0.160402	-0.054659	0.0472402
WBGene00000216	asp-3	X	0.156785	-0.0433574	0.0350283
WBGene00000217	asp-4	X	0.180125	-0.153495	0.0323868
WBGene00000218	asp-5	V	-0.158089	-0.142113	0.00710203
WBGene00000219	asp-6	V	0.0790972	-0.191831	-0.0913768
WBGene00000220	atf-2	II	-0.0401532	0.234516	0.362872
WBGene00000221	atf-5	X	0.491005	-0.115084	-0.14454
WBGene00000222	atf-6	X	0.177037	0.481668	0.180286
WBGene00000223	atf-7	III	0.162765	0.102617	0.0766396
WBGene00000224	atgp-1	IV	0.111763	2.58923	2.40058
WBGene00000225	atgp-2	II	0.0274373	-0.152122	0.198046
WBGene00000226	atl-1	V	-0.0714964	0.127595	-0.0187446
WBGene00000227	atm-1	I	-0.27495	-0.460457	-0.127803
WBGene00000228	atn-1	V	0.12297	-0.0872334	-0.0719805
WBGene00000229	atp-2	III	0.271567	-0.0136725	-0.00881834
WBGene00000230	atp-3	I	0.174716	-0.102653	0.00406678
WBGene00000231	atx-2	III	0.339827	0.098135	0.116099
WBGene00000232	avr-14	I	0.171025	0.688147	0.3304
WBGene00000233	avr-15	V	0.0565133	-0.0285013	-0.0386358
WBGene00000236	bag-1	I	0.212226	-0.356696	-0.333848
WBGene00000237	bam-2	I	0.0392981	0.669192	0.397266
WBGene00000238	bar-1	X	-0.0971357	-0.156529	-0.0820017
WBGene00000239	bas-1	III	0.0770359	1.01671	0.681451
WBGene00000240	pah-1	II	0.0653395	0.0833166	-0.0326306
WBGene00000241	bbs-1	I	-0.0839725	-0.10478	-0.105752
WBGene00000242	bbs-2	IV	-0.0507396	0.0497795	0.08967
WBGene00000244	bbs-8	V	-0.010873	0.147344	0.00402746
WBGene00000245	bca-1	X	0.228314	1.79519	1.80021
WBGene00000246	bcc-1	IV	-0.0557025	-0.0208928	-0.0667728
WBGene00000247	bec-1	IV	0.249073	0.214356	-0.0309721
WBGene00000248	ben-1	III	0.00644444	0.478479	0.0176701
WBGene00000249	bir-1	V	-0.000700047	-0.0514452	-0.0651709
WBGene00000250	bir-2	V	0.0755913	-0.172524	0.0307834
WBGene00000251	bli-1	II	0.171312	0.054845	-0.195923
WBGene00000252	bli-2	II	0.21402	-0.170959	-0.137833
WBGene00000253	bli-3	I	0.109862	0.514821	0.390975
WBGene00000254	bli-4	I	0.151815	0.210818	0.151608
WBGene00000255	bli-5	III	0.0404635	0.0984389	-0.1081
WBGene00000257	bmk-1	V	0.105466	0.163869	-0.0803336
WBGene00000259	bpl-1	II	0.129918	-0.471005	-0.380233
WBGene00000262	bra-1	X	0.479423	1.32853	1.76707
WBGene00000264	brc-1	III	0.0286264	-0.175134	-0.280954
WBGene00000265	brd-1	III	-0.343804	0.0850023	-0.112696
WBGene00000266	bre-1	IV	-0.0410756	0.0999917	0.158106
WBGene00000267	bre-2	III	-0.0160305	0.159172	-0.0435452
WBGene00000268	bre-3	III	0.19855	0.0819536	0.0689463
WBGene00000269	bre-4	I	-0.145618	-0.484793	-1.05483
WBGene00000270	bre-5	IV	0.379741	-0.360796	-0.7647
WBGene00000271	brf-1	II	-0.363018	-0.105984	0.020182
WBGene00000272	bro-1	I	-0.246499	-0.238445	-0.129631
WBGene00000273	brp-1	III	0.0699404	-0.402439	0.0217265
WBGene00000274	btf-1	II	-0.195809	-0.16036	-0.00266226
WBGene00000275	bub-1	I	-0.292115	-0.107184	-0.0223041
WBGene00000276	byn-1	III	-0.263403	-0.100863	0.00572217
WBGene00000277	cab-1	X	-0.126045	-0.320668	-0.3346
WBGene00000279	cah-1	III	0.0429468	0.708308	0.420125
WBGene00000280	cah-2	II	-0.0244327	0.223014	0.160985
WBGene00000281	cah-3	X	-0.0439525	-0.0586123	-0.195902
WBGene00000282	cah-4	X	0.0800365	-0.352613	-0.270734
WBGene00000283	cah-5	X	-0.154662	-0.0341226	0.0115973
WBGene00000284	cah-6	I	0.0841817	0.792949	0.84554
WBGene00000285	cal-1	V	-0.0397026	-0.010312	-0.0120256
WBGene00000286	cal-2	II	0.169307	-0.0671568	0.0546082
WBGene00000287	cal-3	IV	-0.294901	-0.105456	-0.136562
WBGene00000288	cal-4	IV	0.0494025	0.0224543	-0.163657
WBGene00000289	cam-1	II	0.00324885	0.243536	0.104179
WBGene00000292	cap-1	IV	0.370046	-0.0640451	0.0592826
WBGene00000293	cap-2	II	0.104014	0.0863589	-0.124806
WBGene00000294	cas-1	X	1.15149	0.726273	0.625866
WBGene00000295	cat-1	X	-0.0828276	-0.204646	-0.181428
WBGene00000296	cat-2	II	0.0736611	-0.206747	-0.192006
WBGene00000298	cat-4	V	-0.104374	0.166362	-0.016019
WBGene00000301	cav-1	IV	0.0562744	-0.068676	-0.116318
WBGene00000302	cav-2	V	-0.156461	0.0941816	0.170628
WBGene00000366	cbp-1	III	-0.098875	-0.0232819	0.127265
WBGene00000367	cca-1	X	-0.0766965	-0.0653156	-0.102934
WBGene00000368	ccb-1	I	0.336408	1.99948	2.21457
WBGene00000369	ccf-1	III	0.33555	-0.175896	-0.144132
WBGene00000370	ccg-1	IV	0.470648	0.273151	0.511231
WBGene00000371	cco-1	I	0.500234	-0.0522594	0.154871
WBGene00000372	cyp-13A7	II	-0.0664704	-0.0699274	-0.0486072
WBGene00000373	cyp-14A5	V	0.0770911	-0.129411	-0.0897368
WBGene00000375	cyp-44A1	II	0.135248	-0.365337	-0.423518
WBGene00000376	ccr-4	IV	-0.101766	-0.124045	0.0621212
WBGene00000377	cct-1	II	-0.0226286	-0.105183	-0.0729507
WBGene00000378	cct-2	II	0.0600852	0.0367071	-0.0233438
WBGene00000379	cct-4	II	0.015058	-0.0103497	0.0330225
WBGene00000380	cct-5	III	0.25134	0.226779	0.178759
WBGene00000381	cct-6	III	0.0188978	0.0718177	0.0156747
WBGene00000382	cdc-6	I	-0.272279	-0.289751	-0.0838073
WBGene00000383	cdc-14	II	-0.0917813	-0.0286874	0.095442
WBGene00000386	cdc-25.1	I	0.270423	-0.0667276	-0.200355
WBGene00000387	cdc-25.2	V	-0.159104	-0.146148	0.0795683
WBGene00000388	cdc-25.3	III	-0.137467	-0.107004	-0.0357677
WBGene00000389	cdc-25.4	II	-0.0831524	-0.0331604	-0.0185421
WBGene00000390	cdc-42	II	0.233586	0.185847	0.0228417
WBGene00000391	cdd-1	X	-0.012562	-0.0475914	0.117077
WBGene00000392	cdd-2	IV	-0.182136	0.0771544	-0.174594
WBGene00000393	cdf-1	X	-0.00974836	-0.288279	0.144787
WBGene00000395	cdh-3	III	-0.0538166	0.221152	0.0811999
WBGene00000396	cdh-4	III	0.107386	1.03013	0.949376
WBGene00000397	cdh-5	IV	0.0639887	2.57662	2.14978
WBGene00000398	cdh-6	V	-0.0229632	0.154321	0.0800306
WBGene00000399	cdh-7	II	-0.0464699	-0.0965096	-0.101111
WBGene00000401	cdh-9	X	0.134002	-0.00511762	-0.0273095
WBGene00000402	cdh-10	IV	0.100237	0.303788	0.312866
WBGene00000403	casy-1	II	0.166493	3.18928	2.70038
WBGene00000405	cdk-1	III	-0.185352	0.00073574	-0.0661958
WBGene00000406	cdk-4	X	0.0867038	-0.564216	-0.33125
WBGene00000407	cdk-5	III	0.286626	-0.0537058	-0.292053
WBGene00000408	cdk-7	I	0.0984557	-0.0918056	-0.225419
WBGene00000409	cdk-8	I	-0.0694331	0.101888	0.149673
WBGene00000410	cdk-9	I	0.0204611	-0.202494	-0.029624
WBGene00000411	cdl-1	II	0.000288581	0.0432594	0.139405
WBGene00000412	cdr-1	V	-0.00971634	-0.0677621	-0.140343
WBGene00000413	cdt-1	I	-0.292378	0.156162	-0.0885376
WBGene00000414	cec-1	III	0.0407424	0.0728009	-0.396612
WBGene00000415	ced-1	I	0.150335	-0.0206401	0.133919
WBGene00000416	ced-2	IV	-0.0746601	-0.254808	-0.163198
WBGene00000417	ced-3	IV	-0.298562	0.0740594	0.303618
WBGene00000418	ced-4	III	-0.116854	-0.262293	-0.203619
WBGene00000419	ced-5	IV	0.0739777	-0.0672359	0.0522487
WBGene00000420	ced-6	III	0.111245	-0.176861	0.0631596
WBGene00000421	ced-7	III	0.370927	0.000370245	-0.101885
WBGene00000422	ced-8	X	-0.00337014	-0.343624	-0.522362
WBGene00000423	ced-9	III	-0.365698	-0.268261	0.089482
WBGene00000424	ced-10	IV	0.27575	-0.189324	-0.064067
WBGene00000425	ced-11	III	-0.0600025	0.0373603	0.0563197
WBGene00000426	ced-12	I	0.191963	0.185131	0.0837226
WBGene00000427	ced-13	X	-0.072057	-0.281182	0.189554
WBGene00000428	ceh-1	X	-0.115075	-0.0510342	-0.247625
WBGene00000429	ceh-2	I	-0.079766	-0.160307	-0.00982366
WBGene00000430	ceh-5	I	-0.14347	0.355929	0.571782
WBGene00000431	ceh-6	I	-0.074797	0.115216	0.0379482
WBGene00000433	ceh-8	I	-0.079564	0.0988295	0.0948702
WBGene00000434	ceh-9	I	-0.165849	-0.036778	0.0794566
WBGene00000435	ceh-10	III	-0.0296036	-0.0539052	-0.0518231
WBGene00000436	ceh-12	I	-0.0129069	0.130338	-0.159952
WBGene00000437	ceh-13	III	-0.116676	0.153668	0.165281
WBGene00000438	ceh-14	X	0.082358	-0.349984	-0.336007
WBGene00000439	ceh-16	III	0.0743185	0.176116	-0.0742375
WBGene00000440	ceh-17	I	0.149179	0.0459365	-0.0381599
WBGene00000441	ceh-18	X	0.146028	0.168294	-0.0632789
WBGene00000442	ceh-19	IV	0.0544375	0.139597	0.137254
WBGene00000443	ceh-20	III	2.47734	2.25298	1.79249
WBGene00000444	ceh-21	X	0.39274	0.91297	0.81274
WBGene00000445	ceh-22	V	0.0376575	0.101358	-0.255662
WBGene00000446	ceh-23	III	-0.00964909	0.0344992	-0.0710066
WBGene00000447	ceh-24	V	-0.11307	-0.447458	-0.0441599
WBGene00000448	ceh-26	III	-0.0344157	0.0936344	-0.0717648
WBGene00000449	ceh-27	V	-0.157511	0.0759867	-0.0901226
WBGene00000450	ceh-28	X	-0.270817	-0.0475353	-0.0553965
WBGene00000451	ceh-30	X	0.170079	0.200305	0.051269
WBGene00000452	ceh-31	X	-0.176065	0.0741418	0.0640382
WBGene00000453	ceh-32	V	0.0876588	-0.0853093	0.195215
WBGene00000454	ceh-33	V	0.0254875	0.0792863	-0.0237663
WBGene00000455	ceh-34	V	0.104248	-0.188801	-0.160637
WBGene00000457	ceh-36	X	-0.108367	0.0470023	0.0224686
WBGene00000458	ceh-37	X	0.0607965	-0.108256	-0.0426069
WBGene00000459	ceh-38	II	-0.0605055	0.0223075	-0.118617
WBGene00000460	ceh-39	X	0.464097	1.23471	0.688358
WBGene00000461	ceh-40	X	0.0532604	-0.718148	-0.806192
WBGene00000462	ceh-41	X	-0.0519786	0.289989	0.0981529
WBGene00000463	ceh-43	III	0.41272	0.706757	0.243249
WBGene00000464	ceh-44	III	-0.126969	-0.0631908	-0.143187
WBGene00000465	cpg-1	III	-0.622898	-0.0547354	0.0658795
WBGene00000466	cel-1	I	-0.285039	0.00964032	0.022189
WBGene00000467	cep-1	I	-0.466697	0.101718	-0.431771
WBGene00000468	ces-1	I	0.0823644	0.0553006	0.0371105
WBGene00000469	ces-2	I	-0.063587	0.211346	0.397541
WBGene00000472	cey-1	II	0.363592	0.211279	0.0937166
WBGene00000473	cey-2	I	-0.179758	-0.0537118	0.0436188
WBGene00000474	cey-3	I	0.0218234	0.0994267	-0.0482041
WBGene00000475	cey-4	III	0.30847	0.189531	0.0660895
WBGene00000476	cfi-1	I	-0.0610754	0.0687674	0.0505124
WBGene00000477	cft-1	V	-0.0786521	0.129618	0.0638745
WBGene00000478	cfz-2	V	0.162685	0.141071	0.205586
WBGene00000479	cgh-1	III	-0.310167	-0.0868475	-0.081319
WBGene00000480	cgp-1	V	-0.732123	0.145072	0.148346
WBGene00000481	cha-1	IV	-0.102326	-0.158993	-0.0384037
WBGene00000482	chd-3	X	0.509751	2.15001	1.48199
WBGene00000483	che-1	I	0.0251439	-0.178353	0.124181
WBGene00000484	che-2	X	0.059947	-0.107873	0.150348
WBGene00000485	che-3	I	-0.0381846	0.374593	0.172921
WBGene00000490	che-11	V	-0.00494213	0.12359	-0.0650101
WBGene00000491	che-12	V	-0.0627973	-0.00362979	-0.00386411
WBGene00000492	che-13	I	-0.105388	-0.121144	-0.0135222
WBGene00000493	che-14	I	0.0333875	0.45105	0.294071
WBGene00000496	chs-1	I	0.183828	-0.112151	0.0415444
WBGene00000497	chs-2	II	-0.169285	-0.176637	-0.125788
WBGene00000498	chk-1	V	-0.246897	-0.0348715	0.0684944
WBGene00000499	chk-2	V	-0.23582	-0.27068	-0.283233
WBGene00000500	chn-1	I	0.148677	0.0367293	0.0111858
WBGene00000501	cho-1	IV	0.100998	0.658132	0.539161
WBGene00000502	chp-1	I	0.399988	-0.0976422	-0.0703107
WBGene00000503	cht-1	X	0.124492	-0.146001	0.74766
WBGene00000506	cic-1	III	0.0923817	-0.0633497	-0.126836
WBGene00000507	cit-1.1	III	-0.0109208	0.145901	-0.00202672
WBGene00000508	cit-1.2	III	0.13518	-0.0380555	0.0167762
WBGene00000509	cka-1	IV	0.105589	-0.0906507	-0.0880426
WBGene00000510	cka-2	X	0.104268	-0.000752651	-0.152301
WBGene00000511	ckb-1	III	-0.0543315	0.617869	0.702485
WBGene00000512	ckb-2	III	0.069056	0.333319	0.318126
WBGene00000513	ckb-3	III	0.0429076	-0.160712	-0.0798661
WBGene00000514	ckb-4	V	-0.0622577	-0.0647541	-0.338687
WBGene00000515	ckc-1	X	0.0534485	0.00551404	-0.0556497
WBGene00000516	cki-1	II	0.0127828	0.314304	0.34651
WBGene00000517	cki-2	II	-0.838364	-0.0377039	-0.0626967
WBGene00000518	ckk-1	III	0.412269	3.17954	2.68955
WBGene00000519	cku-70	III	-0.500174	-0.189925	-0.176147
WBGene00000520	cku-80	III	-0.0118216	0.0469374	0.00197451
WBGene00000521	cky-1	V	0.077784	-0.0571287	-0.097101
WBGene00000522	clc-1	X	0.176629	-0.0498365	-0.179161
WBGene00000523	clc-2	X	-0.193172	0.0112457	-0.104029
WBGene00000524	clc-3	X	0.179229	0.385649	0.196861
WBGene00000525	clc-4	X	-0.00123983	-0.0975952	-0.140302
WBGene00000526	clc-5	X	-0.173048	-0.214268	-0.100298
WBGene00000527	cle-1	I	-0.038771	0.94054	0.908931
WBGene00000528	clh-1	II	0.0167159	0.94999	0.935311
WBGene00000529	clh-2	II	-0.0873219	-0.0659022	0.0525637
WBGene00000530	clh-3	II	-0.0375298	0.103122	-0.106972
WBGene00000531	clh-4	X	-0.105839	0.0416612	0.0218457
WBGene00000532	clh-5	II	-0.00851816	0.0321377	0.000584275
WBGene00000533	clh-6	V	-0.537301	-0.10684	-0.291699
WBGene00000534	cpi-2	V	-0.0759479	-0.00215267	0.440964
WBGene00000535	cpi-1	IV	0.671152	0.0430484	0.197155
WBGene00000536	clk-1	III	0.0305502	0.189399	-0.0537421
WBGene00000537	clk-2	III	-0.139392	0.0392722	-0.256536
WBGene00000539	cln-3.1	V	-0.121174	0.00429555	0.0347379
WBGene00000540	cln-3.2	I	-0.00706465	-0.215233	-0.523561
WBGene00000541	cln-3.3	V	0.0501367	0.0820103	-0.0124999
WBGene00000542	clp-1	III	-0.144256	-0.0716494	0.155716
WBGene00000543	clp-2	III	-0.105245	-0.0801225	-0.0482033
WBGene00000544	clp-3	I	0.330538	0.0343225	0.0954744
WBGene00000545	clp-4	III	0.0203915	-0.148087	0.305598
WBGene00000546	clp-6	IV	0.562291	-0.351737	-0.419508
WBGene00000547	clp-7	IV	0.0825955	-0.877175	-1.12355
WBGene00000548	clr-1	II	-0.00239502	0.0254452	0.0722279
WBGene00000549	cls-2	III	0.0300227	-0.17239	-0.215794
WBGene00000550	clu-1	III	0.384935	-0.0727084	-0.0381379
WBGene00000551	clx-1	IV	-0.187007	-0.359906	-0.189798
WBGene00000553	cmk-1	IV	-0.092327	0.203555	0.187653
WBGene00000554	cnb-1	V	-0.263926	0.318672	0.27218
WBGene00000561	cnd-1	III	-0.0434696	0.0641239	-0.0993404
WBGene00000562	cng-1	V	0.00781462	0.539677	0.58835
WBGene00000563	cng-3	IV	-0.0049526	0.0373935	-0.0527933
WBGene00000564	cnk-1	III	-0.199218	-0.0081783	-0.0859396
WBGene00000565	cnt-1	II	0.0822418	-0.430102	-0.306227
WBGene00000566	cnt-2	III	-0.227679	-0.204076	0.0159784
WBGene00000567	cnx-1	III	-0.0191506	0.000216812	-0.0825533
WBGene00000583	cof-2	I	0.0274073	0.0319487	0.14449
WBGene00000584	cog-1	II	-0.0294699	0.125289	0.0994866
WBGene00000585	cogc-2	IV	-0.196464	-0.0725513	-0.23465
WBGene00000591	coh-1	X	1.18266	1.4874	0.869612
WBGene00000592	coh-3	V	-0.142225	-0.137177	0.023003
WBGene00000593	col-2	IV	0.311449	0.0129347	-0.0251756
WBGene00000597	col-8	III	0.335799	-0.362991	-0.252645
WBGene00000598	col-9	X	-0.0387743	-0.126803	-0.239986
WBGene00000603	col-14	IV	-0.0654831	-0.123295	-0.130424
WBGene00000606	col-17	II	0.407063	-0.419425	-0.441649
WBGene00000608	col-19	X	0.380322	-0.62172	-0.558616
WBGene00000609	col-20	II	0.478109	-0.492745	-0.532391
WBGene00000610	col-33	IV	-0.0154009	-0.237784	-0.304638
WBGene00000611	col-34	IV	0.142296	-0.550834	-0.27658
WBGene00000612	col-35	I	0.00961602	-0.0197898	-0.207578
WBGene00000613	col-36	II	0.354311	-0.328181	-0.266459
WBGene00000614	col-37	V	0.164757	-0.283106	-0.496072
WBGene00000615	col-38	II	0.584751	0.987544	0.196159
WBGene00000616	col-39	II	0.0978648	-0.208605	-0.209455
WBGene00000617	col-40	II	0.37238	-0.0856824	-0.376389
WBGene00000618	col-41	X	0.299086	-0.161204	-0.241367
WBGene00000620	col-43	V	0.258245	-0.150977	-0.3158
WBGene00000621	col-44	X	0.326909	-0.180954	-0.373086
WBGene00000622	col-45	I	0.155407	-0.396539	-0.126818
WBGene00000623	col-46	I	-0.0347829	-0.531201	-0.192798
WBGene00000624	col-47	I	0.091226	-0.285528	-0.18953
WBGene00000625	col-48	I	0.329713	-0.577828	-0.365484
WBGene00000626	col-49	I	0.145211	-0.0661191	-0.153854
WBGene00000627	col-50	I	0.164807	0.0103377	-0.18667
WBGene00000628	col-51	I	0.125682	-0.185576	-0.25009
WBGene00000629	col-52	I	-0.0192533	-0.178971	-0.159822
WBGene00000630	col-53	I	-0.271338	0.48017	0.0700925
WBGene00000631	col-54	I	0.165461	0.0335138	-0.170397
WBGene00000632	col-55	I	-0.153825	-0.0146521	0.0506917
WBGene00000633	col-56	I	0.00529453	-0.0185325	-0.0326172
WBGene00000634	col-58	I	0.0924123	-0.0111344	0.0147255
WBGene00000636	col-60	I	0.341186	0.0315679	0.0610044
WBGene00000637	col-61	I	0.0761618	-0.18794	-0.0835483
WBGene00000639	col-63	I	0.0671865	-0.161076	-0.126422
WBGene00000640	col-64	I	0.0434727	-0.0969209	-0.235267
WBGene00000641	col-65	I	0.0423058	-0.235385	-0.299521
WBGene00000642	col-66	I	-0.0942539	0.250026	-0.51469
WBGene00000644	col-68	II	0.193426	-0.0250019	0.000285113
WBGene00000645	col-69	II	-0.0886958	-0.319062	-0.184033
WBGene00000646	col-70	II	-0.219881	-0.201879	-0.0537884
WBGene00000647	col-71	II	0.127659	-0.447251	-0.338764
WBGene00000648	col-72	II	0.156669	-0.556625	-0.347981
WBGene00000649	col-73	II	0.0763814	-0.170158	-0.488922
WBGene00000650	col-74	II	0.15308	-0.0722485	-0.326079
WBGene00000651	col-75	II	0.157774	-0.263964	-0.245384
WBGene00000652	col-76	II	0.0530882	-0.186191	0.229153
WBGene00000653	col-77	II	0.297864	-0.280087	-0.528021
WBGene00000654	col-78	II	0.0334525	-0.144131	-0.133633
WBGene00000655	col-79	II	0.133686	0.032997	-0.0112559
WBGene00000656	col-80	II	0.244989	-0.507342	-0.34546
WBGene00000657	col-81	II	0.401497	-0.347763	-0.157326
WBGene00000658	col-83	II	0.133506	-0.0959545	-0.137113
WBGene00000659	col-84	II	0.126536	-0.534308	-0.559097
WBGene00000660	col-85	II	0.240299	-0.256034	-0.318009
WBGene00000661	col-86	II	0.0770413	-0.356493	-0.263535
WBGene00000662	col-87	II	-0.0282576	-0.29251	-0.304329
WBGene00000663	col-88	III	-0.00144123	-0.412123	-0.195333
WBGene00000664	col-89	III	0.440451	-0.124272	-0.0229806
WBGene00000665	col-90	III	0.101987	-0.436998	-0.194756
WBGene00000666	col-91	III	0.489736	-0.311971	-0.229623
WBGene00000668	col-93	III	0.227475	-0.336805	-0.0187158
WBGene00000670	col-95	III	0.590197	-0.263758	-0.314
WBGene00000671	col-96	III	0.562434	-0.384047	-0.276375
WBGene00000672	col-97	III	-0.0147684	-0.364296	-0.293322
WBGene00000673	col-98	III	0.261514	-0.592671	-0.269379
WBGene00000674	col-99	IV	-0.0809835	-0.235093	-0.0730245
WBGene00000675	col-101	IV	0.633635	-0.721184	-0.546939
WBGene00000676	col-102	IV	0.0048581	-0.182191	-0.333633
WBGene00000677	col-103	IV	0.220526	-0.24192	-0.377582
WBGene00000678	col-104	IV	0.166101	-0.100237	-0.0587771
WBGene00000679	col-105	IV	-0.152718	-0.303521	-0.188613
WBGene00000680	col-106	IV	0.541187	-0.514882	-0.435621
WBGene00000681	col-107	IV	-0.143347	-0.536343	-0.250456
WBGene00000682	col-108	IV	-0.0270003	-0.315463	-0.392561
WBGene00000683	col-109	IV	0.178968	-0.38806	-0.436662
WBGene00000684	col-110	IV	0.0505604	-0.0627009	-0.175721
WBGene00000685	col-111	IV	0.328822	-0.151989	-0.297309
WBGene00000686	col-112	IV	0.392945	-0.372846	0.000716504
WBGene00000687	col-113	IV	0.126187	0.215746	0.133614
WBGene00000688	col-114	IV	-0.143368	-0.0635788	-0.442613
WBGene00000689	col-115	IV	-0.00276279	-0.217864	-0.0786623
WBGene00000690	col-116	IV	-0.0752667	-0.324976	-0.284984
WBGene00000692	col-118	IV	-0.0322384	-0.226929	-0.266018
WBGene00000693	col-119	IV	0.516039	-0.472073	-0.441229
WBGene00000694	col-120	IV	0.147855	-0.306464	-0.34741
WBGene00000695	col-121	IV	0.0190087	-0.0806121	-0.218283
WBGene00000696	col-122	IV	0.19585	-0.684519	-0.166424
WBGene00000697	col-123	IV	0.118073	-0.265414	-0.221611
WBGene00000698	col-124	IV	0.129583	-0.643183	-0.435655
WBGene00000699	col-125	IV	0.382207	-0.370679	-0.129774
WBGene00000702	col-128	IV	-0.154461	0.019861	-0.131738
WBGene00000703	col-129	IV	0.393529	-0.224345	-0.333105
WBGene00000704	col-130	IV	0.257778	-0.280421	-0.396245
WBGene00000705	col-131	IV	-0.429332	-0.1942	-0.0836026
WBGene00000706	col-132	IV	-0.0875417	-0.338137	-0.1913
WBGene00000707	col-133	IV	0.226774	-0.198372	-0.456485
WBGene00000708	col-135	IV	0.0935578	-0.106366	-0.22627
WBGene00000710	col-137	IV	0.161522	-0.280279	-0.26519
WBGene00000711	col-138	IV	0.283818	-0.263582	-0.337822
WBGene00000712	col-139	V	0.375285	-0.148673	-0.385152
WBGene00000713	col-140	V	0.457849	-0.618406	-0.561159
WBGene00000714	col-141	V	0.195246	-0.364161	-0.384552
WBGene00000715	col-142	V	0.360272	-0.244376	-0.358748
WBGene00000716	col-143	V	0.320162	-0.0191557	-0.484753
WBGene00000718	col-145	V	0.59261	-0.562469	-0.537449
WBGene00000719	col-146	V	0.377723	-0.206693	-0.186532
WBGene00000720	col-147	V	0.388161	-0.099162	-0.229034
WBGene00000721	col-148	V	0.132038	-0.238397	0.0209062
WBGene00000722	col-149	V	0.137427	-0.268545	-0.142197
WBGene00000723	col-150	V	-0.141528	-0.404251	-0.293964
WBGene00000724	col-151	V	0.0897697	-0.148686	0.0289675
WBGene00000725	col-152	V	-0.158606	-0.103223	0.027083
WBGene00000726	col-153	V	-0.243622	-0.0145546	-0.0494776
WBGene00000729	col-156	V	0.0769268	-0.482296	-0.313749
WBGene00000730	col-157	V	0.446768	0.126662	0.220354
WBGene00000731	col-158	V	0.236151	-0.289772	-0.29107
WBGene00000732	col-159	V	0.564608	-0.516595	-0.0290647
WBGene00000733	col-160	V	0.513154	-0.497508	-0.262616
WBGene00000734	col-161	V	0.651137	0.13621	-0.316486
WBGene00000735	col-162	V	1.05193	0.153315	-0.0700233
WBGene00000736	col-163	V	-0.0534197	-0.0159122	-0.102494
WBGene00000737	col-164	X	-0.00384475	-0.200174	-0.408605
WBGene00000738	col-165	X	0.0867769	-0.160692	-0.251833
WBGene00000744	col-171	X	0.0847959	-0.300564	-0.370841
WBGene00000745	col-172	X	0.228046	0.0651758	0.0192971
WBGene00000746	col-173	X	-0.0513522	-0.283056	-0.21889
WBGene00000747	col-174	X	0.266296	-0.316184	-0.228765
WBGene00000748	col-175	X	0.0352079	-0.475288	-0.461422
WBGene00000749	col-176	X	0.180841	-0.207185	-0.206832
WBGene00000750	col-177	X	0.0240687	-0.000631757	-0.186531
WBGene00000751	col-178	X	0.251778	-0.866651	-0.604971
WBGene00000752	col-179	X	-0.0748218	-0.271763	-0.300833
WBGene00000753	col-180	X	0.609173	-0.51024	-0.445142
WBGene00000754	col-181	X	0.212916	-0.746228	-0.410188
WBGene00000755	col-182	X	0.136736	-0.746985	-0.475752
WBGene00000756	col-183	X	0.331311	-0.451753	-0.244755
WBGene00000757	col-184	X	0.266198	-0.698451	-0.357603
WBGene00000758	col-185	X	0.197047	-0.0923275	-0.27501
WBGene00000759	col-186	X	0.102903	-0.17669	-0.079452
WBGene00000760	col-187	X	-0.016853	-0.488141	-0.038102
WBGene00000761	coq-1	I	-0.188119	-0.183866	-0.207753
WBGene00000762	coq-2	III	-0.335484	-0.0739125	-0.324366
WBGene00000763	coq-3	IV	0.134658	-0.232482	-0.291923
WBGene00000764	coq-4	I	0.0171103	-0.392081	-0.592961
WBGene00000765	coq-5	III	0.290444	-0.0699475	-0.171696
WBGene00000766	coq-6	V	0.114531	-0.38325	-0.283011
WBGene00000767	coq-8	III	-0.0181399	-0.280473	-0.240883
WBGene00000768	cor-1	III	0.0881418	0.211653	0.117591
WBGene00000770	cpb-1	III	-0.339435	-0.243151	-0.0846816
WBGene00000771	cpb-2	II	0.0832778	-0.110278	0.0303916
WBGene00000772	cpb-3	I	-0.620205	0.0480923	-0.0670157
WBGene00000773	cpf-1	II	-0.0022022	-0.0873156	-0.0326519
WBGene00000774	cpf-2	III	0.189245	-0.141048	-0.246659
WBGene00000775	cpin-1	IV	-0.0205988	0.176405	0.118372
WBGene00000776	cpl-1	V	-0.199987	-0.0931955	-0.185467
WBGene00000777	cpn-1	I	0.668225	0.118849	-0.0434524
WBGene00000778	cpn-2	II	0.298889	-0.142708	-0.446716
WBGene00000779	cpn-3	I	0.422265	-0.508523	0.0334348
WBGene00000780	cpn-4	I	0.133763	-0.317026	0.185482
WBGene00000781	cpr-1	V	-0.797118	-0.170909	-0.610652
WBGene00000782	cpr-2	V	0.145463	-0.25619	-0.210343
WBGene00000783	cpr-3	V	-0.0249385	-0.236749	-0.0970205
WBGene00000784	cpr-4	V	-0.406819	-0.323264	-0.131549
WBGene00000785	cpr-5	V	-0.338798	-0.0851442	-0.326877
WBGene00000786	cpr-6	X	0.112522	-0.032531	0.0159178
WBGene00000787	cps-6	I	-0.0814738	-0.54421	-0.551413
WBGene00000788	cpz-1	I	0.632329	0.123784	0.392784
WBGene00000789	cpz-2	V	-0.0615031	0.0724573	-0.0507653
WBGene00000792	crb-1	X	-0.0258744	0.0501456	0.0157505
WBGene00000793	crh-1	III	-0.29099	-0.132031	0.068677
WBGene00000794	crn-1	I	-0.0510809	-0.1927	-0.0063646
WBGene00000795	crn-2	V	0.0688533	-0.475225	-0.432575
WBGene00000796	crn-3	II	-0.0867206	-0.0594185	0.127142
WBGene00000797	crn-4	X	0.359949	-0.231108	-0.506407
WBGene00000798	crn-5	II	0.085147	0.0126929	-0.269937
WBGene00000799	crn-6	III	-0.0484928	0.22984	0.417731
WBGene00000800	crs-1	I	0.271477	0.0339217	-0.0964002
WBGene00000801	crs-2	I	0.2702	-0.206486	0.0108118
WBGene00000802	crt-1	V	0.567833	0.265277	0.082963
WBGene00000803	csb-1	X	0.547031	2.14119	1.80969
WBGene00000804	csc-1	II	0.333079	-0.304041	-0.0634892
WBGene00000812	csk-1	I	0.35278	-0.175557	-0.190515
WBGene00000813	csn-1	V	0.010992	-0.0616757	-0.0823001
WBGene00000814	csn-2	I	-0.360439	-0.126155	-0.00404187
WBGene00000815	csn-3	IV	0.355264	-0.0575115	-0.122874
WBGene00000816	csn-4	IV	-0.055416	0.0269811	-0.0825205
WBGene00000817	csn-5	IV	0.243315	0.0111028	0.00555634
WBGene00000818	csn-6	IV	0.0697388	-0.366291	-0.144118
WBGene00000819	csp-1	II	-0.0108037	-0.0678559	0.0925372
WBGene00000820	csp-2	IV	0.145705	1.84929	1.32984
WBGene00000822	csq-1	X	0.482389	-0.094355	-0.00770022
WBGene00000829	ctb-1	MtDNA	0.463972	-0.566056	-0.163926
WBGene00000831	ctl-2	II	0.113997	-0.0769424	-0.079576
WBGene00000832	ctn-1	I	-0.0140895	-0.127223	-0.0608447
WBGene00000833	cts-1	III	0.204904	0.154284	0.00303431
WBGene00000834	cua-1	III	-0.150871	-0.171463	-0.208123
WBGene00000836	cul-1	III	0.351902	-0.0843139	-0.0394437
WBGene00000837	cul-2	III	0.068798	-0.0409767	0.0114654
WBGene00000838	cul-3	V	0.531024	0.125407	0.00495514
WBGene00000839	cul-4	II	0.10501	0.0918223	0.0395013
WBGene00000840	cul-5	V	-0.154963	0.495833	0.463209
WBGene00000841	cul-6	IV	0.037769	0.176725	0.105547
WBGene00000843	cup-2	I	0.214105	-0.0484407	-0.0725644
WBGene00000845	cup-4	III	0.0675132	0.0440896	-0.00666374
WBGene00000846	cup-5	III	-0.148795	-0.0272181	-0.0469101
WBGene00000851	cut-1	II	-0.0403284	0.777499	0.45854
WBGene00000853	cut-6	III	-0.0316514	-0.105599	-0.0225284
WBGene00000854	cux-7	III	-0.0790287	-0.0495781	-0.304372
WBGene00000857	cwn-1	II	0.304595	0.251794	0.311273
WBGene00000858	cwn-2	IV	0.00284538	0.046153	-0.17768
WBGene00000859	cwp-1	V	-0.0433719	-0.487283	0.0729182
WBGene00000861	cwp-3	V	0.16448	0.06346	0.180851
WBGene00000862	cwp-4	V	0.00251828	-0.00483517	-0.162571
WBGene00000865	cyb-1	IV	-0.4661	-0.0739485	-0.0164269
WBGene00000866	cyb-2.1	IV	-0.116884	-0.0952041	0.0753033
WBGene00000867	cyb-2.2	I	-0.379043	-0.141392	0.0170567
WBGene00000868	cyb-3	V	0.285694	-0.0702565	-0.050162
WBGene00000869	cyc-1	I	0.263045	-0.00959604	0.0124887
WBGene00000870	cyd-1	II	0.0177817	-0.311777	-0.449622
WBGene00000871	cye-1	I	-0.226573	0.0449792	0.173859
WBGene00000872	cyk-1	III	-0.286389	0.0484049	0.108871
WBGene00000874	cyk-3	III	-0.00973782	0.203183	0.0826497
WBGene00000875	cyk-4	III	-0.0782395	0.115639	0.0216998
WBGene00000876	cyl-1	V	-0.0199261	-0.154748	-0.160594
WBGene00000877	cyn-1	V	0.168251	-0.302405	-0.306962
WBGene00000878	cyn-2	III	0.199418	-0.668947	-0.49538
WBGene00000879	cyn-3	V	0.213333	-0.113248	-0.054733
WBGene00000880	cyn-4	II	0.0544827	-0.132276	-0.00275356
WBGene00000881	cyn-5	I	-0.304647	0.0408207	-0.142786
WBGene00000882	cyn-6	III	0.259783	-0.168459	0.228399
WBGene00000883	cyn-7	V	-0.0597071	0.0642487	0.0668207
WBGene00000884	cyn-8	X	-0.0738822	-0.722423	-0.431359
WBGene00000885	cyn-9	III	-0.229578	-0.570854	-0.321237
WBGene00000886	cyn-10	II	0.17782	-0.141349	-0.0603827
WBGene00000887	cyn-11	II	0.0115087	-0.206895	-0.269262
WBGene00000888	cyn-12	IV	0.646807	0.305339	-0.0547599
WBGene00000889	cyn-13	IV	0.153624	-0.15744	-0.0634751
WBGene00000890	sig-7	I	-0.164117	-0.219842	-0.224288
WBGene00000891	cyn-15	I	0.086323	-0.145418	-0.197721
WBGene00000892	cyn-16	II	-0.122463	-0.25025	-0.351289
WBGene00000893	cyn-17	V	-0.00538927	-0.0556772	0.0327965
WBGene00000894	dab-1	II	0.0149212	-0.650855	-0.204025
WBGene00000895	dac-1	III	0.105463	0.19105	0.0654456
WBGene00000896	dad-1	I	0.360569	0.219201	-0.156366
WBGene00000897	daf-1	IV	0.0344631	1.05361	1.14697
WBGene00000898	daf-2	III	-0.125334	-0.133115	-0.0584214
WBGene00000899	daf-3	X	0.0198807	-0.407924	-0.523722
WBGene00000900	daf-4	III	-0.0395144	1.02079	1.03163
WBGene00000901	daf-5	II	-0.0896153	0.204662	0.119623
WBGene00000902	daf-6	X	-0.0318251	0.0640189	0.145971
WBGene00000903	daf-7	III	-0.127701	0.272299	0.431639
WBGene00000904	daf-8	I	0.0672173	2.6588	2.03598
WBGene00000905	daf-9	X	-0.0325075	-0.00739136	-0.207249
WBGene00000906	daf-10	IV	-0.00756669	0.248021	0.0969197
WBGene00000907	daf-11	V	-0.0335331	-0.00985689	-0.0483327
WBGene00000908	daf-12	X	-0.0644914	-0.0137951	-0.0210531
WBGene00000910	daf-14	IV	0.207099	0.64661	0.630088
WBGene00000911	daf-15	IV	-0.134796	-0.00625075	0.103519
WBGene00000912	daf-16	I	-0.00449021	-0.124353	-0.0621016
WBGene00000913	daf-18	IV	-0.165104	-0.0103954	0.0518618
WBGene00000914	daf-19	II	0.146385	1.30249	1.15315
WBGene00000915	daf-21	V	0.182689	-0.00977737	0.115307
WBGene00000920	daf-28	V	0.482099	-0.112372	-0.142497
WBGene00000928	dao-2	II	0.350802	0.180903	-0.10267
WBGene00000929	dao-3	X	0.447403	-0.159324	-0.0618308
WBGene00000930	dao-4	X	-0.0507487	0.137192	-0.0516383
WBGene00000931	dao-5	I	0.142657	-0.067275	-0.0798934
WBGene00000932	dao-6	III	-0.0764313	0.0718179	0.243598
WBGene00000933	dap-3	II	0.0893054	-0.29311	-0.504308
WBGene00000934	dat-1	III	0.0173318	0.0593159	0.120178
WBGene00000935	daz-1	II	-0.121996	-0.0740901	0.0173227
WBGene00000936	dbl-1	V	0.000333046	0.0934362	-0.145522
WBGene00000937	dbr-1	I	0.0305583	-0.0532363	-0.293095
WBGene00000938	dcp-66	I	0.168182	0.968952	0.691616
WBGene00000939	dcr-1	III	-0.171269	0.140038	0.113248
WBGene00000940	dcs-1	V	0.101146	-0.334487	-0.135319
WBGene00000942	deb-1	IV	-0.0272599	0.652221	0.336993
WBGene00000950	deg-1	X	-0.0404438	-0.0445152	-0.0779012
WBGene00000951	deg-3	V	-0.0183556	-0.0186859	-0.0954668
WBGene00000952	del-1	X	0.0251953	-0.0792619	0.0867541
WBGene00000953	del-2	IV	-0.0639866	-0.0559722	-0.0120091
WBGene00000955	des-2	V	0.0843107	-0.0613643	-0.0987033
WBGene00000958	dgk-1	X	-0.0478383	0.144976	0.175419
WBGene00000959	dgk-2	X	-0.0130386	-0.144014	-0.123962
WBGene00000960	dgk-3	III	-0.0702828	-0.0811519	-0.0677891
WBGene00000961	dgn-1	X	-0.20872	-0.149024	0.115127
WBGene00000962	dhc-1	I	-0.132188	-0.0986578	0.0720996
WBGene00000963	dhp-1	I	0.0714737	0.067204	0.00317403
WBGene00000964	dhp-2	IV	-0.176391	-0.0159687	-0.0904107
WBGene00000965	dhs-1	I	-0.0649831	0.266627	0.00323198
WBGene00000966	dhs-2	I	0.124905	0.228625	-0.0544483
WBGene00000967	dhs-3	I	0.187523	0.104321	0.00715887
WBGene00000968	dhs-4	I	-0.00837605	-0.0463956	-0.13189
WBGene00000969	dhs-5	II	0.169908	0.161951	0.505822
WBGene00000970	dhs-6	II	0.137288	-0.146041	-0.16472
WBGene00000971	dhs-7	II	0.0756673	-0.0821385	0.0916809
WBGene00000972	dhs-8	II	-0.223785	-0.0534258	-0.132524
WBGene00000973	dhs-9	III	0.387333	0.381631	-0.153944
WBGene00000974	dhs-11	III	0.391807	-0.161496	-0.232754
WBGene00000975	dhs-12	IV	0.648797	0.0431436	-0.199345
WBGene00000976	dhs-13	V	0.547942	-0.083945	0.0237944
WBGene00000977	dhs-14	V	0.229101	0.138643	-0.0332863
WBGene00000978	dhs-15	V	0.163769	0.0242836	-0.145579
WBGene00000979	dhs-16	V	0.0824889	-0.0554616	-0.221208
WBGene00000980	dhs-17	V	0.106543	-0.216234	0.0819836
WBGene00000981	dhs-18	V	0.124418	-0.127204	-0.0292106
WBGene00000982	dhs-19	V	0.4988	0.426114	0.583113
WBGene00000983	dhs-20	V	-0.07803	-0.0849961	-0.106668
WBGene00000984	dhs-21	V	0.0897977	0.0438843	0.370766
WBGene00000985	dhs-22	V	-0.20668	-0.183422	0.00546118
WBGene00000986	dhs-23	V	-0.0481965	0.102948	-0.0571636
WBGene00000987	dhs-24	V	-0.0366894	-0.295829	-0.570914
WBGene00000988	dhs-25	X	-0.037019	-0.276099	-0.617142
WBGene00000989	dhs-26	X	-0.0347284	0.0939792	-0.00615967
WBGene00000990	dhs-27	X	0.0228131	-0.0567871	-0.298223
WBGene00000991	dhs-28	X	-0.0569009	-0.0218694	-0.0703978
WBGene00000992	dhs-29	X	0.125275	-0.0539742	0.0413787
WBGene00000993	dhs-30	X	-0.0499807	-1.40473	-0.360121
WBGene00000994	dic-1	IV	0.276278	0.0687592	-0.20284
WBGene00000995	die-1	II	-0.00121851	0.386425	0.275746
WBGene00000996	dif-1	IV	0.168146	0.0525204	-0.223284
WBGene00000998	dig-1	III	-0.00462726	0.0572747	0.186319
WBGene00001000	dim-1	X	0.0193828	0.451497	0.226432
WBGene00001001	dis-3	IV	0.120489	-0.0656064	-0.012682
WBGene00001002	div-1	III	-0.00585153	0.0467143	-0.0230147
WBGene00001006	dlg-1	X	0.0318536	-0.275349	-0.133183
WBGene00001007	dli-1	IV	0.191665	0.0960279	-0.0602091
WBGene00001008	dlk-1	I	0.700259	1.72663	2.92018
WBGene00001016	dna-2	II	-0.241086	-0.0953129	0.155031
WBGene00001017	dnc-1	IV	-0.00439253	-0.0103159	-0.0567633
WBGene00001018	dnc-2	III	0.0634831	-0.410031	-0.0133343
WBGene00001019	dnj-1	IV	-0.0299404	0.21806	0.206038
WBGene00001020	dnj-2	IV	-0.0421175	0.137038	0.188797
WBGene00001021	dnj-3	V	-0.105426	-0.486177	-0.379614
WBGene00001022	dnj-4	I	0.177906	-0.201401	-0.293911
WBGene00001023	dnj-5	II	0.358766	0.116097	0.211765
WBGene00001025	dnj-7	X	0.192145	-0.0984544	0.188841
WBGene00001026	dnj-8	II	0.0034932	0.396556	0.150023
WBGene00001027	dnj-9	II	0.257319	-0.157673	-0.0566267
WBGene00001028	dnj-10	III	0.000696269	-0.123726	-0.0259305
WBGene00001029	dnj-11	IV	0.171644	-0.0972098	-0.03991
WBGene00001030	dnj-12	I	0.0510093	-0.0736907	-0.104269
WBGene00001031	dnj-13	II	0.17374	-0.442064	-0.214388
WBGene00001032	dnj-14	X	0.111242	-0.360938	0.722488
WBGene00001033	dnj-15	IV	-0.0182841	-0.554285	-0.292256
WBGene00001034	dnj-16	III	0.259574	-0.410352	-0.365331
WBGene00001035	dnj-17	III	0.480707	-0.237972	-0.154673
WBGene00001036	dnj-18	III	-0.0271728	-0.0472989	-0.284469
WBGene00001037	dnj-19	V	0.229485	-0.0489268	0.0563505
WBGene00001038	dnj-20	II	-0.492529	0.490932	0.169565
WBGene00001039	dnj-21	I	0.393444	0.149428	-0.4888
WBGene00001040	dnj-22	V	0.691175	0.0899017	-0.645258
WBGene00001041	dnj-23	II	0.0790422	0.194426	-0.272378
WBGene00001042	dnj-24	III	0.143992	1.06545	0.769998
WBGene00001043	dnj-25	V	-0.053673	0.0359614	-0.037979
WBGene00001044	dnj-26	IV	-0.225542	-0.423963	-0.593431
WBGene00001045	dnj-27	I	-0.289112	0.166593	0.339165
WBGene00001046	dnj-28	I	-0.290893	-0.352359	-0.173794
WBGene00001047	dnj-29	I	0.39993	-0.00108193	0.0420009
WBGene00001048	dnj-30	I	0.0576152	-0.405922	-0.147946
WBGene00001049	dog-1	I	-0.395889	0.178521	0.0682702
WBGene00001050	dom-3	I	-0.215406	-0.0553051	-0.0420924
WBGene00001052	dop-1	X	0.122672	-0.0295906	0.0104189
WBGene00001053	dop-2	V	0.0752785	-0.0802088	-0.0177074
WBGene00001054	dpf-1	V	-0.0142091	0.0419281	-0.0307292
WBGene00001055	dpf-2	X	0.00645324	-0.0230088	0.0515139
WBGene00001056	dpf-3	I	-0.104363	-0.118974	0.0804633
WBGene00001057	dpf-4	III	-0.0221228	-0.156359	-0.240929
WBGene00001058	dpf-5	IV	0.115394	-0.472571	-0.34166
WBGene00001059	dpf-6	III	-0.0535622	-0.161869	-0.119468
WBGene00001060	dpf-7	IV	-0.0648809	-0.366843	-0.609163
WBGene00001061	dpl-1	II	-0.0942599	-0.219742	0.0531911
WBGene00001062	dpr-1	V	-0.0194821	-0.0484021	-0.0227334
WBGene00001063	dpy-1	III	0.161956	0.490944	0.499664
WBGene00001064	dpy-2	II	0.0673947	-0.03382	-0.0147013
WBGene00001065	dpy-3	X	0.340011	-0.385537	-0.45647
WBGene00001066	dpy-4	IV	0.497831	-0.13275	0.0682482
WBGene00001067	dpy-5	I	0.00023049	-0.528849	-0.353732
WBGene00001068	dpy-6	X	0.0327246	-0.128091	-0.081656
WBGene00001069	dpy-7	X	0.222987	-0.102793	-0.114105
WBGene00001070	dpy-8	X	0.0100433	-0.111998	-0.401481
WBGene00001071	dpy-9	IV	0.269492	-0.667752	-0.386591
WBGene00001072	dpy-10	II	0.187431	-0.277037	-0.185556
WBGene00001073	dpy-11	V	0.260229	0.052886	-0.0319539
WBGene00001074	dpy-13	IV	0.417557	-0.498818	-0.265066
WBGene00001075	dpy-14	I	-0.242145	-0.458222	0.0402353
WBGene00001076	dpy-17	III	-0.144903	-0.0838443	0.0146089
WBGene00001077	dpy-18	III	0.0070884	-0.0737562	-0.192361
WBGene00001078	dpy-19	III	-0.0618235	0.0758725	-0.147846
WBGene00001079	dpy-20	IV	-0.0062802	-0.0582236	-0.0658597
WBGene00001080	dpy-21	V	0.406184	-0.142876	-0.102624
WBGene00001081	dpy-22	X	0.244494	-0.340631	-0.275415
WBGene00001082	dpy-23	X	1.96136	0.953174	0.736035
WBGene00001085	dpy-26	IV	-0.219161	0.124918	0.0848047
WBGene00001086	dpy-27	III	-0.0949734	1.33888	0.519315
WBGene00001087	dpy-28	III	-0.00913035	-0.0170496	-0.125955
WBGene00001088	dpy-30	V	0.252934	-0.0288148	0.1261
WBGene00001089	dre-1	V	0.00335444	0.43716	0.329509
WBGene00001090	drh-1	IV	-0.074744	-0.0431901	-0.0829754
WBGene00001092	dro-1	III	-0.130913	-0.355916	-0.086826
WBGene00001093	drp-1	IV	-0.0955474	-0.0164909	0.0347592
WBGene00001094	drs-1	III	-0.0163622	0.0874955	-0.0289956
WBGene00001095	drs-2	V	-0.116891	-0.625342	-0.55531
WBGene00001096	dsc-1	X	-0.0776323	-0.0363993	-0.00663583
WBGene00001099	dsc-4	IV	0.0732272	0.0822478	0.100417
WBGene00001101	dsh-1	II	0.152407	-0.122105	-0.0914982
WBGene00001102	dsh-2	II	-0.0425023	-0.0523714	-0.043939
WBGene00001103	dsl-1	IV	-0.21488	0.130052	-0.0543887
WBGene00001104	dsl-2	IV	0.113327	-0.205664	-0.0360306
WBGene00001105	dsl-3	IV	0.720171	0.118807	0.465566
WBGene00001106	dsl-4	X	-0.143341	0.103429	0.00813941
WBGene00001107	dsl-5	IV	-0.207085	-0.0521475	-0.0755084
WBGene00001108	dsl-6	IV	-0.0611219	-0.0591987	0.126621
WBGene00001109	dsl-7	V	-0.111625	0.00725123	-0.0484556
WBGene00001110	duo-1	V	-0.105891	-0.167631	-0.130135
WBGene00001111	duo-2	IV	0.0959837	0.210216	-0.0607557
WBGene00001112	duo-3	I	-0.105074	-0.0979873	-0.216503
WBGene00001113	dur-1	IV	0.00608741	0.249206	0.265852
WBGene00001115	dyb-1	I	0.31638	0.717822	-0.0591576
WBGene00001116	dyc-1	X	-0.126869	0.059598	0.0160212
WBGene00001117	dyf-1	I	-0.0338925	0.257237	0.40885
WBGene00001118	dyf-2	III	-0.053918	0.0125803	-0.0727363
WBGene00001119	dyf-3	IV	0.573283	1.61789	0.481568
WBGene00001121	dyf-5	I	-0.0116765	0.217862	0.146948
WBGene00001122	dyf-6	X	0.00469369	-0.495869	-0.155562
WBGene00001124	dyf-8	X	-0.0719127	0.0660677	0.0240778
WBGene00001127	dyf-11	X	0.107109	-0.0646236	-0.0355248
WBGene00001129	dyf-13	II	0.0799663	0.314625	0.136106
WBGene00001130	dyn-1	X	0.351617	0.788404	1.1233
WBGene00001131	dys-1	I	0.091854	0.193774	-0.000980332
WBGene00001132	alp-1	IV	0.00663457	-0.173194	-0.0900635
WBGene00001133	eat-2	II	0.186869	0.0292411	-0.0876173
WBGene00001134	eat-3	II	-0.0217234	-0.145722	0.0125272
WBGene00001135	eat-4	III	-0.0338732	-0.0791739	0.0216787
WBGene00001136	eat-5	I	0.172353	-0.0438598	0.0862514
WBGene00001137	eat-6	V	0.245601	0.0439421	0.108688
WBGene00001145	eat-16	I	0.0286937	-0.320088	-0.624159
WBGene00001148	eat-20	X	-0.0892963	-0.639219	-0.416081
WBGene00001149	bcat-1	X	0.0589069	-0.46487	-0.144202
WBGene00001150	ech-1	V	0.0585483	-0.0704943	-0.0197353
WBGene00001151	ech-2	IV	0.170372	-0.0613899	-0.101651
WBGene00001152	ech-3	V	-0.51027	-0.495542	0.00353842
WBGene00001153	ech-4	II	0.224852	-0.199032	0.0326912
WBGene00001154	ech-5	IV	0.0243154	-0.341847	0.10094
WBGene00001155	ech-6	III	0.177552	0.147726	-0.0230075
WBGene00001156	ech-7	I	0.0988451	-0.255652	-0.283027
WBGene00001157	ech-8	IV	0.143802	0.0589136	-0.0474408
WBGene00001158	ech-9	IV	0.0710577	-0.0664972	-0.0295301
WBGene00001159	eff-1	II	-0.313058	-0.0271213	-0.0898758
WBGene00001160	efk-1	III	0.162315	0.229508	0.0488158
WBGene00001161	efl-1	V	0.193247	0.0932826	-0.262118
WBGene00001162	efl-2	II	-0.13849	-0.22294	-0.0301451
WBGene00001163	efn-2	IV	0.0479083	0.244269	0.100953
WBGene00001164	efn-3	X	0.262987	-0.62296	-0.721648
WBGene00001165	efn-4	IV	-0.0105598	0.046486	0.231058
WBGene00001166	eft-1	III	-0.194965	0.025404	-0.0232967
WBGene00001167	eft-2	I	-0.0121194	-0.0230908	0.0185469
WBGene00001168	eft-3	III	0.0443109	-0.0579675	-0.0369342
WBGene00001169	eft-4	X	0.366706	0.184742	0.33885
WBGene00001170	egl-1	V	-0.648964	0.513261	0.775482
WBGene00001171	egl-2	V	0.102751	0.135125	0.0351072
WBGene00001172	egl-3	V	0.148952	0.997106	0.863091
WBGene00001173	egl-4	IV	0.146189	-0.0532273	0.202073
WBGene00001174	egl-5	III	-0.0336681	0.201631	0.0216096
WBGene00001177	egl-8	V	0.219063	1.27842	0.966005
WBGene00001178	egl-9	V	-0.0295598	0.207499	0.502817
WBGene00001179	egl-10	V	-0.222111	0.194619	0.0524807
WBGene00001182	egl-13	X	0.0785446	0.201582	-0.0997025
WBGene00001184	egl-15	X	-0.0323564	-0.0226495	-0.0213061
WBGene00001185	egl-17	X	-0.16159	0.064549	-0.0927971
WBGene00001186	egl-18	IV	0.179112	-0.0536988	0.20406
WBGene00001187	egl-19	IV	0.0432471	0.0535882	0.18466
WBGene00001188	egl-20	IV	0.137076	0.0700354	0.157692
WBGene00001189	egl-21	IV	0.533528	1.53396	-0.15064
WBGene00001190	egl-23	IV	0.0867061	0.0492586	0.200137
WBGene00001193	egl-26	II	-0.140914	-0.698771	-0.329001
WBGene00001194	egl-27	II	0.0815563	0.0679135	0.234475
WBGene00001196	egl-30	I	0.889106	0.271427	0.0618413
WBGene00001202	egl-36	X	-0.0931284	-0.206567	0.0341455
WBGene00001204	egl-38	IV	-0.0822389	0.868851	1.1218
WBGene00001207	egl-43	II	-0.0769936	-0.0279187	-0.025887
WBGene00001208	egl-44	II	-0.0582905	0.145107	0.333524
WBGene00001209	egl-45	III	0.180138	0.0556482	-0.0573354
WBGene00001210	egl-46	V	-0.0430142	-0.10851	0.067687
WBGene00001211	egl-47	V	-0.122017	-0.132778	-0.0132366
WBGene00001214	ego-1	I	-0.0225765	-0.0806261	-0.0923384
WBGene00001215	ego-2	I	0.187768	-0.276612	-0.0330968
WBGene00001223	ehn-3	IV	-0.0189668	0.029606	-0.0828114
WBGene00001224	ehs-1	II	-0.0446747	0.246398	0.0960662
WBGene00001225	eif-3.B	II	0.19032	-0.364101	-0.116333
WBGene00001226	eif-3.C	I	0.0741031	0.0214731	-0.194593
WBGene00001227	eif-3.D	III	0.124948	0.00585154	-0.155001
WBGene00001228	eif-3.E	I	0.00681103	-0.0338457	-0.213744
WBGene00001229	eif-3.F	II	0.82557	0.16208	-0.10973
WBGene00001230	eif-3.G	II	0.117432	-0.221964	-0.21082
WBGene00001231	eif-3.H	I	0.0249818	0.0871574	-0.0873011
WBGene00001232	eif-3.I	I	0.168992	-0.337367	-0.328445
WBGene00001233	eif-3.K	V	0.490253	0.019922	-0.253912
WBGene00001234	eif-6	I	0.486204	-0.250617	-0.212986
WBGene00001235	elb-1	III	0.0652518	0.00456286	-0.0975782
WBGene00001236	elc-1	III	0.208953	-0.520123	-0.31133
WBGene00001237	elc-2	X	-0.0127301	-0.380041	0.146558
WBGene00001239	elo-1	IV	0.282252	-0.0247202	0.0228809
WBGene00001240	elo-2	IV	0.0438638	-0.356617	-0.12114
WBGene00001241	elo-3	IV	0.359737	-0.0525471	0.00956414
WBGene00001242	elo-4	III	-0.0863657	0.170906	0.122353
WBGene00001243	elo-5	IV	0.342675	-0.162125	-0.0376843
WBGene00001244	elo-6	IV	0.0778195	0.473368	0.600722
WBGene00001245	elo-7	IV	-0.0144091	0.0325106	-0.00273317
WBGene00001246	elo-8	III	0.349549	0.0230983	-0.124301
WBGene00001247	elo-9	II	-0.308397	0.38938	0.235753
WBGene00001248	elp-1	V	-0.0556496	0.00320527	-0.0353758
WBGene00001249	elt-1	IV	-0.0379608	0.105452	0.0310882
WBGene00001250	elt-2	X	-0.0130699	-0.0816044	-0.141407
WBGene00001251	elt-3	X	-0.111655	-0.122656	-0.107784
WBGene00001253	elt-6	IV	-0.22451	-0.155706	0.144758
WBGene00001258	emb-4	V	0.256031	0.0333726	-0.132221
WBGene00001259	emb-5	III	0.148231	0.0469436	0.0832933
WBGene00001262	emb-8	III	-0.484971	-0.132707	-0.0806867
WBGene00001263	emb-9	III	0.227429	-0.256688	0.0348063
WBGene00001281	emb-27	II	-0.264359	-0.22459	-0.341672
WBGene00001284	emb-30	III	-0.129125	0.195656	0.0591513
WBGene00001309	emr-1	I	0.31892	-0.259901	-0.496326
WBGene00001310	end-1	V	0.0279639	-0.165334	0.00476853
WBGene00001311	end-3	V	0.0139761	-0.194419	-0.00496752
WBGene00001320	ent-1	IV	0.3193	-0.0583345	0.139528
WBGene00001324	eor-1	IV	0.0748617	0.464568	0.119143
WBGene00001325	eor-2	X	0.0202697	-0.254531	-0.0678936
WBGene00001328	epi-1	IV	0.0515417	0.0111947	0.0450559
WBGene00001329	epn-1	X	1.9041	0.513382	0.310969
WBGene00001330	eps-8	IV	-0.355449	-0.551154	-0.681547
WBGene00001331	erd-2	X	0.237343	-0.263417	-0.158368
WBGene00001332	eri-1	IV	-0.209006	-0.300922	-0.119461
WBGene00001333	erm-1	I	0.271639	0.344902	0.0462401
WBGene00001334	ero-1	I	0.0468142	-0.239742	-0.234078
WBGene00001335	erp-1	X	0.372224	1.03113	0.75437
WBGene00001336	ers-1	IV	0.180609	-0.0886666	-0.263727
WBGene00001337	ers-2	I	0.107137	0.0270666	-0.0197899
WBGene00001338	ers-3	IV	-0.0578208	-0.350185	-0.434152
WBGene00001340	etr-1	II	0.02467	-0.0339504	0.044018
WBGene00001345	fos-1	V	-0.157431	0.323634	0.415483
WBGene00001352	evl-14	III	0.0203146	-0.0249008	-0.0631944
WBGene00001358	evl-20	II	-0.203009	-0.344295	-0.409229
WBGene00001365	exc-4	I	0.406013	-0.196317	-0.253434
WBGene00001366	exc-5	IV	0.0813568	0.0509793	0.190429
WBGene00001368	exc-7	II	0.0633424	0.731934	0.574955
WBGene00001371	exl-1	II	0.119048	-0.802198	-0.448657
WBGene00001372	exo-3	I	0.397352	-0.0894253	-0.102674
WBGene00001373	exp-1	II	-0.0654317	-0.141109	-0.0166258
WBGene00001374	exp-2	V	-0.168096	-0.110648	-0.0926396
WBGene00001377	eya-1	I	0.0531559	-0.0832315	-0.242903
WBGene00001385	far-1	III	0.26232	-0.211539	0.495333
WBGene00001386	far-2	III	0.289234	-0.0717361	0.390987
WBGene00001387	far-3	V	0.630451	-0.0504049	-0.000666969
WBGene00001388	far-4	V	0.0282595	-0.270014	-0.204529
WBGene00001389	far-5	V	0.178091	-0.0652468	0.0768398
WBGene00001390	far-6	IV	0.158703	-0.772749	-0.235298
WBGene00001391	far-7	II	0.184693	-0.0112165	-0.212327
WBGene00001392	far-8	III	-0.137528	-0.109764	0.0567895
WBGene00001393	fat-1	IV	0.00902893	-0.061869	-0.127685
WBGene00001394	fat-2	IV	0.278533	0.751772	0.269773
WBGene00001395	fat-3	IV	0.245061	0.194343	0.370621
WBGene00001396	fat-4	IV	0.28951	0.0635025	-0.303845
WBGene00001397	fat-5	V	-0.241368	-0.209962	-0.285531
WBGene00001398	fat-6	IV	0.183196	-0.144169	-0.0704773
WBGene00001399	fat-7	V	0.293829	0.107099	0.0429963
WBGene00001400	fax-1	X	0.0735428	-0.11489	-0.0533889
WBGene00001401	fbf-1	II	-0.239578	0.112689	0.13078
WBGene00001402	fbf-2	II	0.112941	-0.0281412	-0.20205
WBGene00001403	fbl-1	IV	0.0157379	0.0266561	-0.0232531
WBGene00001404	fbp-1	I	0.110816	-0.286913	-0.263232
WBGene00001405	fce-1	I	-0.268891	0.0333136	-0.148448
WBGene00001406	fce-2	V	0.280889	-0.319091	-0.438248
WBGene00001410	feh-1	III	0.0984064	0.802919	0.263999
WBGene00001412	fem-2	III	0.269501	-0.121112	-0.113315
WBGene00001413	fem-3	IV	0.560996	-0.317152	-0.807674
WBGene00001414	fer-1	I	0.132397	0.273301	0.371965
WBGene00001423	fib-1	V	0.199597	-0.0324127	-0.25246
WBGene00001424	fis-1	II	-0.214874	-0.156829	-0.273176
WBGene00001425	fis-2	X	0.682864	1.18887	1.3944
WBGene00001426	fkb-1	IV	0.357852	0.0245061	-0.0262021
WBGene00001428	fkb-3	V	0.00675577	-0.326394	-0.00270519
WBGene00001429	fkb-4	V	-0.0855687	0.202918	-0.0862356
WBGene00001430	fkb-5	I	-0.0104932	-0.109793	0.0153176
WBGene00001431	fkb-6	V	-0.371214	-0.0109757	0.0989374
WBGene00001432	fkb-7	I	0.159143	-0.10325	-0.0918724
WBGene00001433	fkb-8	I	0.210993	-0.279782	-0.253872
WBGene00001434	fkh-2	X	-0.00724744	0.106352	-0.12322
WBGene00001436	fkh-4	X	-0.00274922	-0.287413	-0.162588
WBGene00001437	fkh-5	III	-0.0342832	0.107932	-0.00793855
WBGene00001438	fkh-6	II	-0.0201446	-0.0109798	-0.0163852
WBGene00001439	fkh-7	IV	-0.109792	-0.0883913	0.56607
WBGene00001440	fkh-8	II	0.0830624	0.126275	-0.103014
WBGene00001441	fkh-9	X	-0.0430626	-0.286807	-0.0643874
WBGene00001442	fkh-10	I	-0.0640313	-0.0781712	-0.00913977
WBGene00001443	fli-1	III	-0.0676179	0.0733692	0.0654524
WBGene00001444	flp-1	IV	-0.44631	0.117156	-0.0248468
WBGene00001446	flp-3	X	-0.0409372	-0.136606	-0.213189
WBGene00001448	flp-5	X	-0.0449809	-0.777583	-0.524591
WBGene00001449	flp-6	V	0.168739	-0.136759	-0.29453
WBGene00001450	flp-7	X	-0.110054	-0.166265	-0.0461877
WBGene00001451	flp-8	X	0.367715	0.685351	0.594338
WBGene00001456	flp-13	IV	-0.163181	0.00489176	-0.246672
WBGene00001457	flp-14	III	0.162486	-0.204762	-0.445418
WBGene00001460	flp-17	IV	-0.233314	0.0266364	0.0139767
WBGene00001461	flp-18	X	0.0498437	0.235332	0.0269618
WBGene00001465	flr-1	X	0.114669	-0.014518	0.0119015
WBGene00001468	flr-4	X	-0.125068	-0.0334563	-0.140655
WBGene00001470	flt-1	III	0.14246	0.122582	-0.345089
WBGene00001476	fmo-1	IV	-0.0386548	-0.00882195	0.0554684
WBGene00001477	fmo-2	IV	-0.141465	-0.0104347	-0.0563101
WBGene00001478	fmo-3	III	-0.0197751	0.15402	-0.0276367
WBGene00001479	fmo-4	V	0.280713	-0.224861	-0.384851
WBGene00001480	fmo-5	V	0.372956	0.304183	0.478475
WBGene00001481	fog-1	I	0.142445	0.513218	-0.000496329
WBGene00001482	fog-2	V	0.0735573	-0.0806655	0.0621396
WBGene00001483	fog-3	I	0.144002	1.19653	0.191765
WBGene00001484	fox-1	X	0.0833113	-0.613551	-0.342712
WBGene00001485	fre-1	V	-0.0409937	-0.302097	-0.427192
WBGene00001486	frh-1	II	0.0102714	-0.283055	-0.407352
WBGene00001487	frk-1	IV	-0.0851052	0.0536551	0.0788121
WBGene00001488	frm-1	I	0.224522	0.206994	0.41637
WBGene00001489	frm-2	III	-0.0376495	2.04973	1.67188
WBGene00001490	frm-3	X	0.0478612	0.496684	0.421238
WBGene00001491	frm-4	I	-0.00453042	0.19548	0.0348668
WBGene00001493	frm-7	V	-0.14997	0.380201	0.237722
WBGene00001494	frm-8	III	0.234051	0.351095	0.643781
WBGene00001495	frm-9	X	-0.00264544	-0.063457	-0.0311353
WBGene00001496	frm-10	V	0.141705	-0.393832	-0.211726
WBGene00001497	frs-1	I	0.290688	-0.15078	-0.18773
WBGene00001498	frs-2	II	0.135081	-0.238752	-0.326878
WBGene00001499	fsn-1	III	-0.183776	-0.0659072	-0.0926949
WBGene00001500	ftn-1	V	-0.187013	-0.250997	-0.415271
WBGene00001501	ftn-2	I	0.143932	0.24344	0.0405585
WBGene00001502	ftt-2	X	0.514157	0.925301	0.789438
WBGene00001503	fum-1	III	0.0875162	0.0858966	0.024297
WBGene00001505	fut-1	II	-0.089933	-0.0925005	-0.0273913
WBGene00001506	fut-2	V	0.0716842	-0.00401307	0.0041203
WBGene00001507	fut-4	II	-0.0518437	-0.32962	-0.10276
WBGene00001508	fut-8	V	0.0733125	-0.00819593	0.0696124
WBGene00001509	fzo-1	II	-0.278816	0.00826595	-0.250135
WBGene00001510	fzr-1	II	-0.549854	0.173682	-0.0682126
WBGene00001511	fzy-1	II	-0.285401	-0.139169	-0.029989
WBGene00001512	gab-1	III	0.100527	-0.0480035	0.0528002
WBGene00001513	gad-1	V	-0.0535679	-0.0592932	-0.208176
WBGene00001514	gak-1	III	0.0337629	-0.0642296	0.10109
WBGene00001515	gap-1	X	-0.0454068	-0.0702339	-0.104247
WBGene00001516	gap-2	X	0.0380839	-0.785057	-0.255791
WBGene00001517	gar-1	X	0.0568921	-0.126075	-0.0888528
WBGene00001518	gar-2	III	0.126999	0.225425	0.00167056
WBGene00001519	gar-3	V	-0.150057	0.0249949	0.0475849
WBGene00001520	gas-1	X	2.21475	1.67045	1.45071
WBGene00001522	gbh-1	II	0.0293035	-0.12563	-0.455516
WBGene00001523	gbh-2	II	-0.157109	0.271197	0.456924
WBGene00001526	gck-1	V	-0.422333	0.0497287	-0.0602921
WBGene00001527	gcs-1	II	-0.319296	0.216133	0.159167
WBGene00001528	gcy-1	II	0.0089724	-0.0496283	0.0420643
WBGene00001529	gcy-2	II	0.0818305	0.0640962	0.0808138
WBGene00001530	gcy-3	II	-0.0238484	0.00273341	-0.0891555
WBGene00001531	gcy-4	II	-0.0906087	-0.0528363	-0.0629762
WBGene00001532	gcy-5	II	-0.0699822	-0.0261846	0.042641
WBGene00001533	gcy-6	V	0.0396968	0.111307	0.00244573
WBGene00001534	gcy-7	V	0.00909881	-0.0143856	-0.0194473
WBGene00001535	gcy-8	IV	-0.141809	0.0804246	0.117693
WBGene00001536	gcy-9	X	0.0107105	0.0255497	0.0825449
WBGene00001537	gcy-11	X	0.00762137	0.0336785	0.0132543
WBGene00001538	gcy-12	II	0.0528769	-0.286198	0.103139
WBGene00001539	gcy-13	V	0.0838696	0.0238524	0.0427035
WBGene00001540	gcy-14	V	0.0576083	0.0147359	0.0678433
WBGene00001541	gcy-15	II	-0.059948	-0.169556	-0.289586
WBGene00001542	gcy-17	I	-0.0533965	-0.00614697	-0.000512621
WBGene00001543	gcy-18	IV	0.0244624	0.120646	0.0672298
WBGene00001544	gcy-19	II	0.0758457	2.67493	2.27998
WBGene00001545	gcy-20	V	0.0168155	0.0243815	-0.127021
WBGene00001546	gcy-21	II	-0.0472159	-0.0129205	-0.0310768
WBGene00001547	gcy-22	V	-0.0168944	-0.0427581	-0.0446001
WBGene00001548	gcy-23	IV	0.118246	1.21783	1.05753
WBGene00001549	gcy-25	IV	-0.0474234	-0.0650011	-0.0256436
WBGene00001550	gcy-27	IV	-0.0309962	0.043565	0.0220223
WBGene00001551	gcy-31	X	0.107732	-0.0333658	-0.0781062
WBGene00001552	gcy-32	V	0.0332454	0.0902263	0.099541
WBGene00001553	gcy-33	V	0.0283449	1.02228	0.612364
WBGene00001554	gcy-34	V	-0.0673926	-0.00716725	-0.0278842
WBGene00001555	gcy-35	I	0.186615	-0.0545154	-0.130923
WBGene00001556	gcy-36	X	-0.0899874	-0.11035	0.0189604
WBGene00001557	gcy-37	IV	-0.0744871	-0.142408	-0.206596
WBGene00001558	gdi-1	IV	-0.346739	-0.128119	-0.142974
WBGene00001559	gei-1	III	0.108955	0.430251	0.196497
WBGene00001560	gei-3	X	0.0203743	-0.276366	-0.148783
WBGene00001561	gei-4	III	-0.192927	0.131567	0.158817
WBGene00001562	lin-66	IV	0.337685	0.538071	0.586821
WBGene00001563	gei-6	V	0.188256	-0.015403	0.0357364
WBGene00001564	gei-7	V	0.321104	-0.431946	-0.334593
WBGene00001565	gei-8	III	0.0465985	1.51384	1.15289
WBGene00001566	gei-9	IV	-0.0507114	-0.548535	-0.469809
WBGene00001568	gei-11	I	-0.150552	-0.0936321	0.0522525
WBGene00001569	gei-12	X	0.0292961	-0.351279	-0.340922
WBGene00001570	gei-13	III	0.00604966	0.0910388	0.278785
WBGene00001571	gei-14	II	-0.356031	0.335624	0.182826
WBGene00001572	gei-15	X	0.0157865	-0.403975	-0.154126
WBGene00001573	gei-16	III	0.0134438	-0.264536	0.0743164
WBGene00001574	gei-17	I	-0.133522	0.252189	0.19699
WBGene00001575	gei-18	IV	-0.122152	0.130094	-0.0581524
WBGene00001577	gem-4	IV	-0.0717516	-0.216841	0.0151502
WBGene00001578	ges-1	V	0.0736468	-0.00441764	0.0178999
WBGene00001579	gex-2	IV	0.0323853	0.637128	0.546188
WBGene00001580	gex-3	IV	-0.12364	-0.01625	0.0186502
WBGene00001581	gfi-1	V	0.268202	0.0522632	0.175375
WBGene00001582	gfi-2	I	-0.536515	0.120339	-0.0127221
WBGene00001583	gfi-3	X	0.603781	1.56144	1.46125
WBGene00001584	gfi-4	IV	-0.140256	0.243312	0.0949328
WBGene00001585	gfl-1	IV	-0.432186	-0.140071	0.113049
WBGene00001586	ggr-1	II	-0.0353132	0.0412462	-0.0436629
WBGene00001587	ggr-2	X	-0.113795	0.00357484	-0.0480762
WBGene00001588	ggr-3	II	-0.0180693	-0.115255	-0.0227951
WBGene00001589	gip-1	III	-0.0325211	-0.135883	-0.0906202
WBGene00001590	gip-2	I	-0.388909	-0.479303	-0.400608
WBGene00001591	glc-1	V	0.00946569	-0.152756	-0.0816803
WBGene00001592	glc-2	I	0.0201395	0.045558	-0.0839672
WBGene00001593	glc-3	V	-0.0823834	-0.117581	-0.104654
WBGene00001594	glc-4	II	0.00197955	0.0757764	0.101923
WBGene00001595	gld-1	I	0.666696	0.0189731	-0.00047625
WBGene00001596	gld-2	I	0.0325487	-0.114798	-0.00184975
WBGene00001597	gld-3	II	-0.123519	0.0251251	0.0768385
WBGene00001598	glh-1	I	-0.172421	0.0621469	0.114692
WBGene00001599	glh-2	I	-0.176344	-0.133738	-0.0204277
WBGene00001600	glh-3	I	-0.480055	0.0403491	0.0328374
WBGene00001601	glh-4	I	-0.0626088	0.0373132	0.153301
WBGene00001602	gln-1	X	0.153171	0.487174	0.916405
WBGene00001603	gln-2	III	0.0120148	-0.437124	-0.495225
WBGene00001604	gln-3	IV	0.440122	-0.456226	-0.445209
WBGene00001606	gln-5	IV	-0.0312323	0.0272744	0.00182494
WBGene00001607	gln-6	IV	1.44228	-0.0847611	0.0470426
WBGene00001608	R07B1.8	X	0.0184074	0.02383	-0.0070459
WBGene00001609	glp-1	III	-0.323739	0.134689	0.236532
WBGene00001612	glr-1	III	-0.0277859	0.121281	0.0480701
WBGene00001613	glr-2	III	0.0913822	0.100432	0.0490007
WBGene00001614	glr-3	I	-0.0797568	-0.02144	-0.027489
WBGene00001615	glr-4	II	-0.0252052	0.111915	0.0340539
WBGene00001616	glr-5	V	0.105426	1.45211	1.18488
WBGene00001617	glr-6	X	0.0240159	0.128717	0.164921
WBGene00001618	glr-7	X	-0.177014	0.0052923	0.0237269
WBGene00001619	glr-8	X	-0.134311	-0.0144022	-0.0508255
WBGene00001620	glt-1	X	0.230559	-0.500661	-1.07984
WBGene00001621	glt-3	IV	0.110929	-0.0544438	-0.144753
WBGene00001622	glt-4	X	0.278548	-0.136664	-0.0954012
WBGene00001623	glt-5	II	-0.197235	0.171492	0.33357
WBGene00001624	glt-6	IV	0.0179363	-0.0017573	0.0821863
WBGene00001625	glt-7	IV	-0.0162708	-0.087897	-0.0616669
WBGene00001626	gly-1	II	-0.0771659	0.0321768	-0.0988336
WBGene00001627	gly-2	I	0.0459374	0.0507029	0.100472
WBGene00001628	gly-3	III	-0.647806	0.183052	0.0167211
WBGene00001629	gly-4	V	-0.084532	-0.180023	-0.582241
WBGene00001630	gly-5	III	0.0318416	-0.116265	-0.185891
WBGene00001631	gly-6	III	0.202413	0.456039	0.613024
WBGene00001632	gly-7	V	-0.122373	0.174279	-0.10905
WBGene00001633	gly-8	III	0.125951	-0.273995	-0.275057
WBGene00001635	gly-10	IV	-0.0274406	0.0263033	0.107973
WBGene00001636	gly-11	III	-0.192543	0.482329	0.136481
WBGene00001637	gly-12	X	0.0484899	0.107785	0.120837
WBGene00001638	gly-13	X	0.777762	1.41404	1.70399
WBGene00001639	gly-14	III	0.0638645	-0.228606	-0.368623
WBGene00001640	gly-15	I	-0.0200652	-0.0732528	0.0443393
WBGene00001641	gly-16	I	0.0364131	0.0926949	0.0735486
WBGene00001642	gly-17	I	-0.119649	-0.0325002	-0.057761
WBGene00001643	gly-18	I	-0.0261919	0.173651	-0.0532828
WBGene00001644	gly-19	I	-0.042568	0.0855767	0.131512
WBGene00001645	gly-20	V	0.12246	0.254544	0.126229
WBGene00001646	gna-1	V	-0.18898	0.168871	0.0873924
WBGene00001647	gna-2	I	0.30752	-0.540963	-0.15568
WBGene00001648	goa-1	I	0.246622	0.237188	0.334021
WBGene00001649	gob-1	X	0.0971141	-0.128336	0.731241
WBGene00001650	gon-1	IV	0.0498025	0.121875	0.436529
WBGene00001651	gon-2	I	0.0531913	1.0383	0.614588
WBGene00001653	gon-4	IV	-0.145512	0.0732191	0.101183
WBGene00001660	gop-1	III	-0.128037	-0.33194	-0.427895
WBGene00001661	gop-2	III	0.324257	-0.293445	-0.229477
WBGene00001662	gop-3	III	0.334198	-0.0634464	6.0273e-05
WBGene00001663	gpa-1	V	0.999089	0.748238	0.316807
WBGene00001664	gpa-2	V	-0.136674	-0.170268	-0.189204
WBGene00001665	gpa-3	V	-0.0121764	0.0243124	-0.100963
WBGene00001666	gpa-4	IV	-0.0527111	0.455732	0.755903
WBGene00001667	gpa-5	X	-0.0508554	0.0516986	-0.213199
WBGene00001668	gpa-6	X	0.0271197	0.00247464	-0.0557667
WBGene00001669	gpa-7	IV	-0.00426255	0.419704	0.180304
WBGene00001670	gpa-8	V	-0.0521619	-0.0355371	0.0776589
WBGene00001671	gpa-9	V	-0.0561236	-0.00508976	-0.0199545
WBGene00001672	gpa-10	V	0.0351243	-0.051027	-0.101692
WBGene00001673	gpa-11	II	0.0743649	-0.105306	-0.0101496
WBGene00001674	gpa-12	X	-0.133768	-0.181752	0.150228
WBGene00001675	gpa-13	V	0.0700486	0.0218141	0.0501829
WBGene00001676	gpa-14	I	-0.0681733	0.120286	0.00564489
WBGene00001677	gpa-15	I	-0.154893	-0.0318171	-0.0186816
WBGene00001678	gpa-16	I	0.0867411	-0.0833696	0.00431356
WBGene00001679	gpb-1	II	0.254376	0.21404	0.161444
WBGene00001680	gpb-2	I	-0.202689	1.21302	1.16012
WBGene00001684	gpd-2	X	1.34545	0.176599	0.364681
WBGene00001685	gpd-3	X	1.23755	0.112114	0.385369
WBGene00001687	gpn-1	X	0.000714978	0.0210883	-0.0942509
WBGene00001688	gpr-1	III	-0.210172	-0.238045	-0.40637
WBGene00001689	gpr-2	III	0.070356	-0.206995	-0.118112
WBGene00001690	grd-1	X	-0.00725478	-0.0274871	-0.000773722
WBGene00001691	grd-2	V	-0.0485151	0.027986	-0.0797236
WBGene00001692	grd-3	IV	-0.0642309	-0.0881646	-0.386207
WBGene00001693	grd-4	X	-0.0249387	-0.0979442	-0.113587
WBGene00001694	grd-5	V	-0.0827996	0.147829	-0.427045
WBGene00001695	grd-6	V	0.034417	-0.192759	-0.198887
WBGene00001696	grd-7	X	0.00136956	-0.0256322	-0.161107
WBGene00001697	grd-8	V	-0.0141874	-0.0986256	-0.235689
WBGene00001698	grd-9	V	-0.0534841	0.089936	-0.077295
WBGene00001700	grd-11	V	0.0456762	-0.127902	-0.17324
WBGene00001701	grd-12	V	0.111765	-0.0188197	-0.11763
WBGene00001702	grd-13	IV	0.335695	-0.248732	-0.558873
WBGene00001703	grd-14	X	0.261247	-0.240674	0.00704125
WBGene00001704	grd-15	I	-0.0820633	-0.166061	-0.0934253
WBGene00001705	grd-16	IV	0.135741	-0.163954	-0.0143932
WBGene00001707	grh-1	I	-0.116156	-0.213105	-0.0798707
WBGene00001708	grk-1	X	0.167075	-0.311721	-0.0345334
WBGene00001709	grk-2	III	-0.0528076	-0.0643637	-0.0368891
WBGene00001710	grl-1	V	-0.060725	0.246057	0.0139701
WBGene00001711	grl-2	V	0.0372211	0.168655	-0.0151135
WBGene00001712	grl-3	V	-0.0221573	0.0137916	-0.123422
WBGene00001713	grl-4	IV	-0.230918	0.500463	0.289996
WBGene00001714	grl-5	V	0.0647624	-0.000271721	-0.366626
WBGene00001715	grl-6	X	-0.00600948	0.201189	-0.0283478
WBGene00001716	grl-7	V	-0.102205	-0.066844	-0.372253
WBGene00001717	grl-8	V	0.0585694	-0.0328472	0.11636
WBGene00001718	grl-9	V	-0.109594	0.177063	-0.0145395
WBGene00001719	grl-10	V	-0.104246	-0.00957297	-0.421376
WBGene00001720	grl-11	III	0.0213504	-0.0392883	-0.127339
WBGene00001721	grl-12	V	-0.0424638	0.254312	-0.168179
WBGene00001722	grl-13	V	0.0271461	0.0279697	-0.21905
WBGene00001723	grl-14	V	0.0543324	-0.0352575	-0.0696373
WBGene00001724	grl-15	III	-0.198969	0.0757409	0.191373
WBGene00001725	grl-16	I	0.0790431	-0.444661	-0.516899
WBGene00001726	grl-17	V	0.444236	-0.0111083	-0.389057
WBGene00001727	grl-18	V	0.58135	0.328604	0.119897
WBGene00001728	grl-19	IV	0.181273	-0.191924	-0.0496782
WBGene00001729	grl-20	IV	0.225987	-0.499235	-0.386538
WBGene00001730	grl-21	IV	-0.0779585	0.0649842	-0.151488
WBGene00001731	grl-22	III	-0.0132843	-0.160671	-0.423679
WBGene00001732	grl-23	V	-0.0745037	0.278324	-0.340267
WBGene00001733	grl-24	IV	-0.225641	-0.105206	-0.200171
WBGene00001734	grl-25	III	0.071843	-0.133996	-0.246692
WBGene00001735	grl-26	IV	0.0187037	-0.175473	0.014668
WBGene00001737	grl-28	V	0.239703	-0.21016	-0.15131
WBGene00001738	grl-29	V	0.283953	-0.0658392	0.0682648
WBGene00001740	gro-1	III	0.327503	-0.198642	-0.344928
WBGene00001743	grp-1	III	-0.212666	-0.217288	-0.0909141
WBGene00001744	grs-1	III	-0.161992	0.048278	-0.178078
WBGene00001745	gsa-1	I	0.286307	-0.0246528	0.117905
WBGene00001746	gsk-3	I	0.240615	-0.195436	-0.13457
WBGene00001747	gsp-1	V	0.161569	0.262494	0.145546
WBGene00001748	gsp-2	III	0.133488	-0.174654	0.135276
WBGene00001749	gst-1	III	0.110847	0.119497	-0.00335916
WBGene00001750	gst-2	IV	-0.224888	0.0307111	-0.101181
WBGene00001751	gst-3	IV	-0.0427701	-0.0762348	0.0285621
WBGene00001752	gst-4	IV	0.03835	-0.0634782	-0.165222
WBGene00001753	gst-5	II	-0.107539	-0.493466	-0.355839
WBGene00001754	gst-6	II	0.235439	0.0659123	-0.0811623
WBGene00001755	gst-7	II	0.480048	0.164531	0.294333
WBGene00001756	gst-8	II	0.0893099	-0.252623	-0.123133
WBGene00001757	gst-9	II	0.183241	0.0246127	0.152975
WBGene00001758	gst-10	V	0.238369	-0.256401	-0.0303924
WBGene00001759	gst-11	X	0.0608598	0.152006	0.0740048
WBGene00001760	gst-12	II	0.176018	0.0504085	-0.39198
WBGene00001761	gst-13	II	0.39841	-0.0543322	-0.228616
WBGene00001762	gst-14	II	0.101898	0.0304705	-0.165253
WBGene00001763	gst-15	II	0.0476986	0.193914	-0.125055
WBGene00001764	gst-16	II	-0.157444	-0.24231	-0.0248119
WBGene00001765	gst-17	II	0.0263167	-0.0891661	-0.0164774
WBGene00001766	gst-18	II	0.00919949	-0.0365846	-0.123489
WBGene00001767	gst-19	II	0.0170824	0.014833	-0.0560102
WBGene00001768	gst-20	II	0.0520414	-0.154912	-0.295314
WBGene00001769	gst-21	V	-0.0276595	0.183266	-0.0768353
WBGene00001770	gst-22	V	0.154969	-0.010239	0.114409
WBGene00001771	gst-23	V	-0.235601	-0.0468151	0.0477621
WBGene00001772	gst-24	II	0.383465	0.451947	0.275966
WBGene00001773	gst-25	I	0.142498	0.0728974	-0.172892
WBGene00001774	gst-26	II	0.416571	0.139093	-0.273007
WBGene00001775	gst-27	II	0.337797	-0.369599	0.0327292
WBGene00001776	gst-28	II	-0.0533511	-0.0607706	-0.0291611
WBGene00001777	gst-29	II	0.0470288	0.166155	0.137623
WBGene00001778	gst-30	II	-0.00101351	0.141409	0.259976
WBGene00001779	gst-31	II	0.147103	-0.0629389	-0.115941
WBGene00001780	gst-32	II	0.132434	0.0817112	-0.032714
WBGene00001781	gst-33	V	-0.114072	-0.0204963	-0.144865
WBGene00001782	gst-34	II	-0.118889	-0.20424	0.0881432
WBGene00001783	gst-35	II	-0.223747	-0.0194747	-0.0928474
WBGene00001784	gst-36	X	0.184701	-0.33453	-0.248984
WBGene00001785	gst-37	V	0.398103	-0.0457629	-0.230038
WBGene00001786	gst-38	V	-0.110015	-0.359212	-0.237052
WBGene00001787	gst-39	II	0.0256614	0.119618	-0.166994
WBGene00001788	gst-40	IV	0.106219	-0.108523	0.124805
WBGene00001789	gst-41	V	-0.425242	-0.00719962	-0.11249
WBGene00001790	gst-42	X	0.0526847	0.0120549	0.122969
WBGene00001791	gst-43	I	-0.123308	-0.189648	-0.177043
WBGene00001792	gst-44	V	0.0415143	-0.445456	-0.212835
WBGene00001793	gsy-1	II	0.36545	-0.0414677	-0.00679316
WBGene00001794	gta-1	IV	0.0305938	-0.0140283	0.157724
WBGene00001795	gtl-1	IV	-0.0186254	-0.0194726	-0.00275866
WBGene00001796	gtl-2	IV	-0.00251509	-0.0756689	0.0638339
WBGene00001803	lite-1	X	0.0321312	-0.0746609	0.00951717
WBGene00001804	gur-3	X	-0.00743885	-0.0663221	0.0226983
WBGene00001805	gur-4	II	0.11908	0.0668344	-0.0435303
WBGene00001806	gur-5	II	-0.132344	-0.0365904	-0.028958
WBGene00001811	haf-1	IV	-0.0537216	-0.298869	-0.189676
WBGene00001812	haf-2	II	0.250692	0.00976241	-0.0359442
WBGene00001813	haf-3	V	0.0287394	-0.157048	-0.238855
WBGene00001814	haf-4	I	-0.0908601	-0.236132	-0.0489756
WBGene00001815	hmt-1	III	0.106766	-0.3844	-0.648949
WBGene00001816	haf-6	I	0.059361	-0.568384	0.272721
WBGene00001817	haf-7	V	0.0497759	0.196469	0.309124
WBGene00001818	haf-8	IV	0.0947129	-0.077445	0.0333854
WBGene00001819	haf-9	I	0.168994	0.699501	0.705829
WBGene00001820	ham-1	IV	0.0337635	-0.208937	-0.330917
WBGene00001821	ham-2	X	0.125644	0.146066	-0.00715383
WBGene00001823	hap-1	III	0.191995	-0.634207	-0.77249
WBGene00001824	hbl-1	X	-0.0206797	-0.133599	0.0936026
WBGene00001827	hcf-1	IV	0.210698	-0.0588872	-0.0555771
WBGene00001828	hch-1	X	0.0619965	-0.10735	0.119163
WBGene00001829	hcp-1	V	-0.114019	-0.0200539	0.10785
WBGene00001830	hcp-2	V	-0.20572	-0.322842	-0.0722137
WBGene00001831	hcp-3	III	-0.261944	0.228883	-0.0239898
WBGene00001832	hcp-4	I	0.00902042	-0.00335689	0.0582568
WBGene00001833	hcp-6	I	-0.366274	-0.175394	-0.0531851
WBGene00001834	hda-1	V	-0.27994	0.183586	0.0328854
WBGene00001835	hda-2	II	-0.635277	0.0995006	0.0725789
WBGene00001836	hda-3	I	0.0232424	-0.0204829	0.0561042
WBGene00001837	hda-4	X	-0.0236658	0.0400487	0.128385
WBGene00001838	hda-6	II	-0.834283	-0.0178143	-0.0446339
WBGene00001839	hdl-1	IV	0.00836297	0.274262	0.283479
WBGene00001840	hel-1	II	-0.0333866	0.0760704	-0.0499462
WBGene00001841	hen-1	X	0.0467678	0.237701	-0.21578
WBGene00001842	her-1	V	0.0697694	-0.0554761	-0.0979836
WBGene00001843	hgo-1	I	0.0879113	-0.108291	0.0570119
WBGene00001844	hid-1	X	0.0567514	-0.421598	-0.325548
WBGene00001851	hif-1	V	0.0944793	0.130589	-0.0116605
WBGene00001852	hil-1	V	-0.021673	0.516196	0.853604
WBGene00001853	hil-2	IV	-0.368757	0.176281	-0.14243
WBGene00001854	hil-3	X	0.478183	0.0139632	0.050119
WBGene00001855	hil-4	V	-0.0377094	-0.0907546	-0.121761
WBGene00001856	hil-5	I	0.249148	0.215413	-0.0364937
WBGene00001857	hil-6	V	-0.0200172	0.361956	-0.21129
WBGene00001859	hil-8	I	0.0563703	-0.118255	-0.102636
WBGene00001860	him-1	I	-0.335068	0.219622	0.0721226
WBGene00001862	him-3	IV	-0.450524	-0.266687	0.139061
WBGene00001863	him-4	X	0.109405	0.0775762	-0.135152
WBGene00001865	him-6	IV	-0.562824	-0.266935	-0.07061
WBGene00001867	him-8	IV	0.099724	-0.212365	-0.391199
WBGene00001869	him-10	III	-0.428345	-0.118881	0.0853318
WBGene00001872	him-14	II	0.175338	-0.463998	-0.319568
WBGene00001874	him-17	V	-0.094251	-0.106119	-0.0160038
WBGene00001898	his-24	X	-0.0903324	0.39413	0.0860231
WBGene00001909	his-35	V	0.414878	0.118884	-0.268631
WBGene00001915	his-41	V	-0.2364	0.260495	-0.248608
WBGene00001943	his-69	III	0.645741	0.199627	-0.308946
WBGene00001944	his-70	III	-0.0482822	-0.0990864	-0.672055
WBGene00001945	his-71	X	-0.148227	-0.426478	-0.0921814
WBGene00001946	his-72	III	-0.0657608	0.0558451	-0.0327868
WBGene00001948	hlh-1	II	-0.130496	0.146733	-0.153956
WBGene00001949	hlh-2	I	0.106747	0.623973	0.528913
WBGene00001950	hlh-3	II	0.0205525	-0.229125	-0.0989757
WBGene00001951	hlh-4	III	0.018444	0.431998	0.535038
WBGene00001952	hlh-6	II	0.0113825	-0.0877054	-0.0767189
WBGene00001953	hlh-8	X	-0.110917	-0.158156	0.0569714
WBGene00001954	hlh-10	V	0.0904271	-0.251837	-0.0639999
WBGene00001955	hlh-11	III	0.180393	0.571078	0.428807
WBGene00001956	hlh-12	IV	-0.171113	-0.227925	-0.402962
WBGene00001957	hlh-13	X	0.152434	-0.133177	0.115346
WBGene00001958	hlh-14	II	0.112412	-0.161438	0.133916
WBGene00001960	hlh-16	I	-0.245265	-0.402179	-0.0130525
WBGene00001962	hlh-19	X	-0.0125591	0.0952639	0.0663988
WBGene00001963	btb-1	III	0.876057	-0.106803	-0.190658
WBGene00001965	hlh-26	II	-0.18538	0.0190825	0.0450737
WBGene00001972	hmg-1.2	III	0.122051	0.176406	0.0461519
WBGene00001973	hmg-3	I	0.127003	0.0789107	0.156376
WBGene00001974	hmg-4	III	-0.26578	-0.0448048	0.134581
WBGene00001975	hmg-5	IV	0.113706	0.234103	0.0876502
WBGene00001976	hmg-11	II	0.329795	-0.118475	0.0406085
WBGene00001977	hmg-12	II	-0.00379721	0.0265039	0.0295314
WBGene00001978	hmp-1	V	-0.0764809	0.28464	0.202008
WBGene00001979	hmp-2	I	0.0902966	-0.12257	-0.0640399
WBGene00001980	hmr-1	I	0.0549319	-0.261609	-0.274173
WBGene00001981	hnd-1	X	-0.257474	-0.438441	-0.0747769
WBGene00001983	hoe-1	IV	0.244196	-0.135094	0.078503
WBGene00001984	hog-1	X	-0.14464	-0.224082	-0.0175273
WBGene00001985	hop-1	I	0.158492	0.126187	-0.152787
WBGene00001986	hot-1	V	-0.119085	0.373411	-0.165962
WBGene00001987	hot-2	V	0.302663	-0.0753805	-0.235131
WBGene00001988	hot-3	II	-0.154233	-0.315392	0.025357
WBGene00001989	hot-4	III	-0.225668	0.341435	0.210792
WBGene00001990	hot-5	I	-0.0631183	-0.168449	-0.0889123
WBGene00001991	hot-6	V	-0.0181251	0.122193	0.0645621
WBGene00001992	hot-7	II	-0.0182828	0.0983394	0.0812484
WBGene00001993	hpd-1	III	0.026051	0.184499	0.0168193
WBGene00001994	hpk-1	X	0.187978	0.171031	0.116182
WBGene00001995	hpl-1	X	-0.246122	-1.47695	-0.705376
WBGene00001996	hpl-2	III	-0.108205	-0.0422713	0.0527728
WBGene00001997	hpr-9	III	0.241725	-0.203483	-0.0357924
WBGene00001998	hpr-17	II	-0.113601	-0.209099	-0.132019
WBGene00001999	hrp-1	IV	0.272289	-0.0788103	0.00638518
WBGene00002000	hrp-2	I	0.347082	0.172149	0.112547
WBGene00002001	hrs-1	IV	0.342673	-0.25995	0.0403516
WBGene00002003	hse-5	III	-0.333511	-0.326519	-0.0929002
WBGene00002004	hsf-1	I	0.0927531	0.078484	-0.0931733
WBGene00002005	hsp-1	IV	0.295523	-0.00145955	0.0451093
WBGene00002007	hsp-3	X	0.658606	0.139485	0.414522
WBGene00002008	hsp-4	II	-0.323287	0.181306	0.0943198
WBGene00002010	hsp-6	V	0.199079	-0.0720556	0.0845636
WBGene00002011	hsp-12.2	III	0.174156	-0.670413	-0.385352
WBGene00002012	hsp-12.3	IV	0.30424	0.472825	0.0769632
WBGene00002013	hsp-12.6	IV	-0.156454	-0.0527359	0.0899743
WBGene00002016	hsp-16.2	V	-0.600927	-0.00865192	0.149802
WBGene00002018	hsp-16.41	V	-0.191722	-0.0611137	-0.180478
WBGene00002021	hsp-17	V	-0.322401	-0.151263	0.153781
WBGene00002023	hsp-25	X	0.267485	1.02554	1.09646
WBGene00002024	hsp-43	X	0.0860602	-0.165689	-0.205651
WBGene00002025	hsp-60	III	0.362785	0.00754982	0.0101938
WBGene00002026	hsp-70	I	-0.08519	-0.0448069	0.134386
WBGene00002027	hsr-9	I	-0.258326	-0.14705	0.00243944
WBGene00002028	hst-1	IV	0.134035	-0.210894	-0.280866
WBGene00002029	hst-2	X	0.22218	0.566126	0.125072
WBGene00002030	hst-3.1	II	0.113103	0.257693	0.136399
WBGene00002031	hst-6	X	0.132112	0.210273	0.761886
WBGene00002032	htp-1	IV	-0.315102	0.0715466	-0.0669407
WBGene00002033	htp-2	IV	-0.181269	0.0771293	0.00471647
WBGene00002034	htp-3	I	-0.774663	-0.268755	-0.0548368
WBGene00002035	hum-1	I	-0.0229757	0.185407	0.0393448
WBGene00002036	hum-2	V	0.0725171	0.218055	0.0937936
WBGene00002037	hum-4	X	-0.00059466	-0.00565974	-0.119189
WBGene00002038	hum-5	III	0.0103985	0.19565	0.162503
WBGene00002039	hum-6	X	-0.0375149	-0.0165299	-0.0606165
WBGene00002040	hum-7	I	0.0394238	0.397785	-0.041189
WBGene00002041	hum-8	IV	-0.038992	0.0397923	-0.00471978
WBGene00002042	hus-1	I	0.0855886	-0.503222	-0.524532
WBGene00002043	hyl-1	IV	0.0479401	0.303474	0.125783
WBGene00002044	hyl-2	X	0.960597	0.656295	0.129674
WBGene00002045	icd-1	II	0.082988	-0.0281486	-0.179921
WBGene00002046	icl-1	IV	0.136749	0.365315	-0.259358
WBGene00002047	icp-1	I	-0.19329	0.0916079	-0.0940744
WBGene00002048	ida-1	III	-0.0690229	0.138179	-0.0624377
WBGene00002050	ifa-1	X	0.0886639	0.0627249	0.0872298
WBGene00002051	ifa-3	X	-0.0173681	0.0154337	-0.0142147
WBGene00002052	ifa-4	X	0.00737192	-0.110339	-0.104305
WBGene00002053	ifb-1	II	0.0661418	0.445754	0.368357
WBGene00002054	ifb-2	II	-0.0877824	-0.14927	0.166422
WBGene00002055	ifc-1	V	-0.0203606	-0.0339725	-0.115118
WBGene00002056	ifc-2	X	-0.0353796	0.017578	-0.0977353
WBGene00002057	ifd-1	X	0.0502451	-0.00564411	0.010551
WBGene00002058	ifd-2	X	-0.0756074	-0.0938343	-0.131858
WBGene00002059	ife-1	III	0.278921	-0.129768	-0.0872725
WBGene00002060	ife-2	X	1.45681	0.827442	0.54492
WBGene00002061	ife-3	V	-0.000579872	-0.14998	-0.094675
WBGene00002062	ife-4	X	0.0561886	-0.167717	-0.119342
WBGene00002063	ife-5	II	0.233262	-0.554781	-0.551329
WBGene00002064	iff-1	III	0.29384	-0.0226384	-0.0338168
WBGene00002065	iff-2	II	0.427344	-0.0399349	0.0732968
WBGene00002066	ifg-1	II	0.0938662	-0.0188739	0.0675619
WBGene00002067	ifp-1	X	0.0834352	-0.196506	0.094411
WBGene00002068	ify-1	II	0.0506932	-0.0702931	0.0686349
WBGene00002069	ikb-1	I	0.0393247	0.0662372	-0.0616717
WBGene00002070	ile-1	I	0.191885	0.0902526	-0.0430064
WBGene00002071	ile-2	X	0.71727	0.122117	-0.063171
WBGene00002072	ima-1	V	0.0139399	-0.0799083	-0.0554539
WBGene00002073	ima-2	I	0.117635	0.02912	-0.00275875
WBGene00002074	ima-3	IV	0.274575	0.0519606	-0.0598296
WBGene00002075	imb-1	I	0.205651	0.174043	0.0950175
WBGene00002076	imb-2	II	0.11077	-0.095906	-0.216822
WBGene00002077	imb-3	I	0.35229	-0.0457034	-0.0205872
WBGene00002079	xpo-2	I	0.339361	0.00951995	0.0562734
WBGene00002080	xpo-3	IV	0.137088	0.0786035	0.0308361
WBGene00002081	ina-1	III	-0.0932238	0.00591763	-0.0322328
WBGene00002083	inf-1	III	0.206096	0.0813799	0.0250834
WBGene00002084	ins-1	IV	-0.293546	0.00730828	-0.308635
WBGene00002085	ins-2	II	-0.204615	0.201585	0.225095
WBGene00002086	ins-3	II	-0.0818567	0.0329266	-0.151686
WBGene00002087	ins-4	II	-0.114999	-0.276945	-0.13693
WBGene00002089	ins-6	II	-0.0569101	-0.0882973	-0.291568
WBGene00002090	ins-7	IV	0.0257469	-0.207867	-0.188769
WBGene00002091	ins-8	IV	0.0415428	0.217256	-0.299077
WBGene00002092	ins-9	X	-0.147983	-0.299644	-0.173726
WBGene00002098	ins-15	II	-0.0674814	-0.139516	-0.059046
WBGene00002100	ins-17	III	0.148091	-0.0712942	0.0985963
WBGene00002102	ins-19	II	-0.0155764	-0.0994202	-0.0287478
WBGene00002107	ins-24	I	0.158966	-0.110437	-0.0916138
WBGene00002109	ins-26	I	0.00927027	-0.54068	-0.161264
WBGene00002113	ins-30	I	-0.0737998	-0.530557	-0.101073
WBGene00002114	ins-31	II	0.28681	0.655072	0.37567
WBGene00002115	ins-32	II	0.330292	0.15093	0.0195166
WBGene00002116	ins-33	I	-0.0384647	0.000371244	-0.345249
WBGene00002117	ins-34	IV	0.0768206	0.0315673	-0.957297
WBGene00002119	ins-36	I	0.234255	-0.0206896	0.162106
WBGene00002120	ins-37	II	0.166444	0.107945	-0.0677446
WBGene00002123	inx-1	X	0.0218032	-0.204785	-0.0296166
WBGene00002124	inx-2	X	-0.0819356	0.239185	-0.317472
WBGene00002125	inx-3	X	0.0369101	-0.545748	-0.312818
WBGene00002126	inx-4	V	0.143939	-0.0744501	-0.238904
WBGene00002127	inx-5	X	0.217187	-0.0848197	0.29504
WBGene00002128	inx-6	IV	-0.00199374	0.0412254	-0.040658
WBGene00002129	inx-7	IV	-0.145002	-0.0517019	-0.386578
WBGene00002130	inx-8	IV	0.0393884	-0.494847	0.201842
WBGene00002131	inx-9	IV	-0.081461	-0.567339	0.0981917
WBGene00002132	inx-10	V	0.0529233	0.393555	0.563184
WBGene00002133	inx-11	V	0.355018	0.131828	0.19597
WBGene00002134	inx-12	I	0.197597	0.268097	0.436935
WBGene00002135	inx-13	I	0.0295778	1.41295	1.34644
WBGene00002136	inx-14	I	0.509054	-0.0135304	0.0666572
WBGene00002137	inx-15	I	-0.101957	0.157511	0.101604
WBGene00002138	inx-16	I	0.00423635	0.149758	0.0046071
WBGene00002139	inx-17	I	0.0293888	0.888276	0.723069
WBGene00002140	inx-18	IV	-0.077518	0.0242511	0.131079
WBGene00002141	inx-19	I	0.0627236	0.101924	0.180596
WBGene00002142	inx-20	I	-0.0291862	0.0736242	-0.132302
WBGene00002143	inx-21	I	-0.23734	-0.146298	-0.165272
WBGene00002144	inx-22	I	-0.150449	-0.302239	-0.0265344
WBGene00002146	ipp-5	X	-0.0496608	-0.0499961	-0.0880945
WBGene00002147	ire-1	II	-0.651249	0.165437	0.168143
WBGene00002148	gon-14	V	0.0195705	-0.0757183	-0.111168
WBGene00002149	irk-1	X	0.112254	-0.133825	-0.140551
WBGene00002150	irk-2	X	-0.105003	-0.0971201	0.0585445
WBGene00002151	irk-3	X	-0.171158	-0.0767301	-0.0558755
WBGene00002152	irs-1	IV	-0.109038	-0.0468163	0.0583351
WBGene00002153	irs-2	I	0.298092	-0.199233	-0.16624
WBGene00002162	isp-1	IV	0.118417	-0.0203426	0.0489882
WBGene00002163	ist-1	X	-0.174545	-0.0775012	0.0752379
WBGene00002169	isw-1	III	-0.0255124	0.043409	0.0218083
WBGene00002173	itr-1	IV	-0.0397781	0.169571	0.312438
WBGene00002174	itx-1	I	0.013812	0.4898	0.252587
WBGene00002175	jac-1	IV	-0.0175288	-0.0998206	-0.0652648
WBGene00002176	jip-1	II	0.0435422	-0.0939572	-0.121978
WBGene00002177	jkk-1	X	-0.0803922	-0.00242143	0.041866
WBGene00002178	jnk-1	IV	0.108791	0.12085	0.00728712
WBGene00002179	jph-1	I	0.199033	0.442327	0.393074
WBGene00002180	jtr-1	IV	0.558412	-0.407673	-0.552337
WBGene00002181	kal-1	I	0.186954	-0.398723	-0.235557
WBGene00002182	kap-1	III	-0.00553749	0.207172	0.387695
WBGene00002183	kat-1	II	-0.0330425	0.0926601	-0.0163161
WBGene00002184	kel-1	II	-0.0987961	-0.256495	-0.200507
WBGene00002185	kel-3	III	-0.276829	-0.0179238	-0.164345
WBGene00002186	kel-10	III	0.11715	2.2073	1.35016
WBGene00002187	kgb-1	IV	-0.093874	-0.00620017	0.0242983
WBGene00002188	kgb-2	IV	-0.0808313	-0.0429662	-0.020476
WBGene00002189	kin-1	I	0.312557	-0.0332219	0.234687
WBGene00002190	kin-2	X	0.302401	0.00892403	-0.0409194
WBGene00002191	kin-3	I	0.481154	-0.0182413	-0.0807317
WBGene00002192	kin-4	IV	0.0214621	0.132157	0.0352779
WBGene00002193	kin-5	IV	-0.0824115	0.020622	-0.0968059
WBGene00002194	kin-6	II	0.0647849	0.0934366	0.180598
WBGene00002195	kin-9	X	0.0435161	0.0200843	0.162308
WBGene00002196	kin-10	I	0.321747	0.16853	0.144628
WBGene00002198	kin-14	I	0.0923076	0.00652607	0.246591
WBGene00002199	kin-15	II	-0.117099	-0.147226	-0.0656539
WBGene00002200	kin-16	II	-0.0692522	-0.0792676	0.0357087
WBGene00002201	kin-18	III	-0.00564	0.184083	0.130965
WBGene00002202	kin-19	III	0.215697	0.194131	0.102702
WBGene00002203	kin-20	X	0.268276	0.101731	0.114852
WBGene00002204	kin-21	IV	-0.116245	-0.0105486	-0.0755196
WBGene00002205	kin-23	I	-0.129657	0.0296526	0.178051
WBGene00002206	kin-24	IV	-0.0705908	0.00465571	-0.053703
WBGene00002207	kin-25	X	0.0499599	-0.205558	-0.0363261
WBGene00002208	kin-26	IV	0.0137863	0.199255	0.0228948
WBGene00002210	kin-29	X	0.123469	-0.00693662	-0.0746589
WBGene00002211	kin-30	V	-0.0584898	-0.0502285	-0.0319197
WBGene00002212	kin-31	III	0.203686	-0.101032	-0.127385
WBGene00002213	kin-32	I	0.0117795	1.15918	0.661374
WBGene00002214	klc-1	IV	0.0143046	-0.0415189	-0.0842901
WBGene00002215	klc-2	V	0.0370956	1.2122	1.15481
WBGene00002216	klp-3	II	-0.0278846	0.513697	0.508972
WBGene00002217	klp-4	X	0.0621037	0.0170684	0.159497
WBGene00002218	klp-6	III	-0.111801	0.0838745	0.111425
WBGene00002219	klp-7	III	0.404226	0.0664215	0.100861
WBGene00002220	klp-8	X	0.496143	0.73207	0.628053
WBGene00002221	klp-10	IV	-0.111277	0.199459	-0.064291
WBGene00002222	klp-11	IV	-0.00933286	0.183643	0.298897
WBGene00002223	klp-12	IV	-0.397277	0.303353	0.0510749
WBGene00002224	klp-13	X	-0.0150548	0.0558395	0.0614776
WBGene00002225	klp-15	I	0.288486	0.207461	0.0808455
WBGene00002226	klp-16	I	0.177086	0.0607175	0.0964865
WBGene00002227	klp-17	II	0.139349	-0.0754622	-0.0503595
WBGene00002228	klp-18	IV	-0.273526	0.304446	0.267364
WBGene00002229	klp-19	III	-0.106749	0.10193	0.104653
WBGene00002230	klp-20	III	-0.0520025	-0.416449	-0.54401
WBGene00002231	knl-1	III	-0.121594	0.0255191	0.092553
WBGene00002232	kpc-1	I	0.0925037	0.189831	0.0707734
WBGene00002233	kqt-1	X	-0.046504	0.0612347	-0.0847491
WBGene00002234	kqt-2	X	0.093613	-0.0949606	-0.157927
WBGene00002235	kqt-3	II	-0.0635348	0.0144557	-0.13904
WBGene00002238	krs-1	II	0.0357795	-0.139201	-0.178066
WBGene00002239	ksr-1	X	0.127733	0.144524	0.296034
WBGene00002240	ksr-2	I	-0.137545	0.129888	0.0962356
WBGene00002241	kup-1	V	-0.0152044	0.0722725	0.0885944
WBGene00002242	kvs-1	X	-0.101385	-0.0942575	-0.0661233
WBGene00002243	lad-2	IV	0.0255742	0.0519599	0.27061
WBGene00002245	lag-1	IV	0.0999824	-0.140964	0.112033
WBGene00002246	lag-2	V	-0.0577844	-0.0113369	-0.214114
WBGene00002247	lam-1	IV	-0.0409218	0.236023	0.099649
WBGene00002248	lam-3	I	-0.0431429	0.189755	0.18176
WBGene00002249	lap-1	III	0.297431	0.00739257	0.0271071
WBGene00002251	lat-1	II	-0.202796	0.0487506	0.233248
WBGene00002252	lat-2	II	0.0847559	-0.120875	-0.0260284
WBGene00002253	lbp-1	X	0.13673	-0.186794	-0.245743
WBGene00002254	lbp-2	X	0.30656	-0.0630632	-0.234258
WBGene00002255	lbp-3	X	0.434978	0.0109459	-0.19734
WBGene00002256	lbp-4	V	-0.200656	-0.468848	-0.429687
WBGene00002257	lbp-5	I	0.43269	-0.0845213	-0.0447272
WBGene00002258	lbp-6	I	0.516045	-0.68403	-0.491077
WBGene00002259	lbp-7	V	-0.458986	-0.140763	-0.2609
WBGene00002260	lbp-8	V	-0.168835	-0.399024	-0.125306
WBGene00002261	ldb-1	X	-0.101175	-0.651522	-0.12826
WBGene00002262	ldh-1	II	0.850791	0.0760219	0.440229
WBGene00002263	lea-1	V	-0.0134	-0.125422	0.449914
WBGene00002264	lec-1	II	-0.352842	0.0900618	-0.0248257
WBGene00002265	lec-2	II	0.254501	-0.179733	-0.266517
WBGene00002266	lec-3	II	0.379046	0.217197	1.43794
WBGene00002267	lec-4	III	0.432694	-0.187146	0.193323
WBGene00002268	lec-5	II	0.233444	0.370743	0.0785303
WBGene00002269	lec-6	III	-0.16831	-0.259315	0.0236023
WBGene00002270	lec-7	X	0.0634347	0.131549	0.0312692
WBGene00002271	lec-8	X	-0.111631	-0.349282	-0.315263
WBGene00002272	lec-9	X	0.323251	-4.1415e-05	0.154454
WBGene00002273	lec-10	V	0.102965	-0.03378	-0.240966
WBGene00002274	lec-11	IV	0.818395	-0.0895403	-0.0669178
WBGene00002275	lem-2	II	-0.14831	-0.268695	-0.0387203
WBGene00002276	lem-3	I	0.124847	0.210043	0.0481897
WBGene00002280	let-2	X	0.356613	-0.483683	0.0201394
WBGene00002295	let-19	II	0.124356	1.21414	0.676061
WBGene00002297	ect-2	II	0.0742684	0.0897946	0.0376906
WBGene00002299	let-23	II	-0.0156929	-0.111946	-0.0217293
WBGene00002324	let-49	I	0.233174	-0.0882168	-0.134795
WBGene00002335	let-60	IV	0.222141	0.237983	0.0418205
WBGene00002344	let-70	IV	0.389997	0.168857	0.0963449
WBGene00002348	let-75	I	0.0617902	-0.145215	-0.107412
WBGene00002363	let-92	IV	0.250681	0.0477544	0.00853254
WBGene00002368	let-99	IV	-0.454191	0.0130948	0.000499074
WBGene00002393	lpr-1	I	-0.114816	-0.0436816	0.0315018
WBGene00002497	let-268	II	0.0878339	0.0556239	-0.0502545
WBGene00002583	let-363	I	0.294131	0.149549	0.199548
WBGene00002601	let-381	I	0.03122	0.0835566	0.0788646
WBGene00002632	let-413	V	0.207547	1.89772	1.46963
WBGene00002637	let-418	V	-0.0537537	-0.14142	-0.0218036
WBGene00002694	let-502	I	-0.164128	0.0959552	0.0415134
WBGene00002717	let-526	I	-0.27125	0.0933431	0.190033
WBGene00002827	let-653	IV	-0.132549	0.284047	0.151448
WBGene00002845	let-711	III	0.0231898	-0.0296597	-0.0235577
WBGene00002850	let-716	III	-0.024993	-0.239745	-0.0643521
WBGene00002855	let-721	III	0.125933	0.175062	-0.0067207
WBGene00002879	let-754	III	0.347597	-0.122076	-0.166408
WBGene00002881	let-756	III	0.113147	0.301801	0.80119
WBGene00002891	let-767	III	-0.252654	-0.0437554	-0.404563
WBGene00002915	let-805	III	-0.0353038	-0.0529967	-0.152839
WBGene00002957	let-858	II	0.187389	-0.29492	-0.162968
WBGene00002974	lev-1	IV	-0.0644451	-0.102345	0.0957672
WBGene00002975	lev-8	X	0.0181385	0.0256356	0.00373944
WBGene00002977	lev-10	I	0.0246728	-0.0494201	0.027821
WBGene00002978	lev-11	I	0.189457	-0.333294	0.154722
WBGene00002979	lfe-2	I	0.0149246	1.3288	1.04409
WBGene00002980	lgg-1	II	-0.269667	0.0880323	0.0899535
WBGene00002981	lgg-2	IV	0.503422	0.126032	-0.0399012
WBGene00002982	lgg-3	III	0.135729	-0.473939	-0.36338
WBGene00002983	lgx-1	X	0.00265176	-0.0487864	0.0228259
WBGene00002985	lig-1	V	-0.439476	-0.282473	-0.0433892
WBGene00002986	lig-4	III	-0.134289	-0.0680763	-0.052372
WBGene00002987	lim-4	X	0.149528	0.0513411	-0.0930241
WBGene00002988	lim-6	X	-0.239481	-0.279038	0.231309
WBGene00002989	lim-7	I	0.122616	0.491043	0.328679
WBGene00002990	lin-1	IV	-0.0195538	-0.675547	-0.247461
WBGene00002991	lin-2	X	0.0230082	0.33323	1.00805
WBGene00002992	lin-3	IV	-0.372008	-0.117913	-0.31662
WBGene00002993	lin-4	II	0.052831	-0.310997	-0.155177
WBGene00002994	lin-5	II	0.0669189	0.0940095	0.0359696
WBGene00002996	lin-7	II	0.292157	0.049802	-0.30237
WBGene00002997	lin-8	II	0.328348	0.0796899	0.0984454
WBGene00002998	lin-9	III	-0.0902119	-0.0602855	-0.100385
WBGene00002999	lin-10	I	0.011358	0.244794	0.0827682
WBGene00003000	lin-11	I	-0.120545	-0.0991579	0.0568099
WBGene00003001	lin-12	III	-0.0176234	-0.254888	-0.144171
WBGene00003002	lin-13	III	-0.0669638	0.160609	0.0314526
WBGene00003003	lin-14	X	0.00691859	0.014697	0.153415
WBGene00003006	lin-17	I	0.361396	0.411161	0.458606
WBGene00003007	lin-18	X	0.0717994	0.17174	-0.170462
WBGene00003008	lin-22	IV	0.075508	-0.182492	0.163798
WBGene00003009	lin-23	II	-0.293694	0.0747011	0.148619
WBGene00003010	lin-24	IV	0.125712	0.0171031	-0.17237
WBGene00003011	lin-25	V	0.0611513	0.326491	0.0131463
WBGene00003012	lin-26	II	-0.0820242	-0.164567	-0.104383
WBGene00003014	lin-28	I	-0.158532	-0.121669	-0.26889
WBGene00003015	lin-29	II	0.0457153	-0.140861	0.23546
WBGene00003017	lin-31	II	-0.258511	-0.501319	-0.296901
WBGene00003018	lin-32	X	0.186524	-0.0142738	-0.224874
WBGene00003019	lin-33	IV	0.111295	-0.090097	0.182828
WBGene00003020	lin-35	I	0.0277089	0.0679694	-0.0653109
WBGene00003021	lin-36	III	0.27946	0.18554	0.137915
WBGene00003022	lin-37	III	0.482768	-0.0451245	-0.30152
WBGene00003024	lin-39	III	-0.0257295	-0.150491	-0.164792
WBGene00003025	lin-40	V	0.156436	0.0726284	0.121891
WBGene00003026	lin-41	I	-0.204842	-0.307948	-0.213059
WBGene00003029	lin-44	I	0.114837	0.477283	0.333984
WBGene00003030	lin-45	IV	-0.224346	0.0483419	-0.0629199
WBGene00003031	lin-46	V	-0.0934758	0.172672	0.033996
WBGene00003033	lin-48	III	0.0232264	1.33398	1.37056
WBGene00003034	lin-49	IV	-0.298887	0.13182	0.273956
WBGene00003035	lin-52	III	0.0992807	0.320146	0.0945979
WBGene00003036	lin-53	I	-0.0796029	-0.0519777	-0.182638
WBGene00003037	lin-54	IV	-0.330076	-0.119928	-0.0878408
WBGene00003040	lin-59	I	0.507582	1.67628	1.73624
WBGene00003041	lin-61	I	-0.279538	0.00530808	-0.159615
WBGene00003043	lip-1	IV	0.521804	-0.310593	-0.601061
WBGene00003044	lir-1	II	-0.057019	-0.365829	-0.300037
WBGene00003045	lir-2	II	-0.0130586	-0.410471	-0.346359
WBGene00003046	lir-3	II	-0.0863375	0.176824	-0.0492321
WBGene00003047	lis-1	III	0.485918	0.035892	0.0848595
WBGene00003048	lit-1	III	0.388844	0.0387239	-0.129781
WBGene00003052	lmn-1	I	0.0401992	0.0474013	0.0395602
WBGene00003053	lmp-1	X	0.245346	0.211514	0.252279
WBGene00003055	lon-1	III	0.230703	-0.24492	-0.426659
WBGene00003056	lon-2	X	0.107772	-0.799635	-1.04085
WBGene00003057	lon-3	V	0.125316	-0.190592	-0.303194
WBGene00003058	lov-1	II	0.0106073	-0.00253017	-0.0143413
WBGene00003059	lpd-2	I	0.206003	-0.370571	-0.147982
WBGene00003060	lpd-3	I	-0.0278766	0.107993	-0.0140758
WBGene00003061	lpd-5	I	0.413739	0.157827	0.0620674
WBGene00003062	lpd-6	I	0.209792	-0.277707	0.00583479
WBGene00003063	lpd-7	III	-0.178191	-0.164994	-0.0654906
WBGene00003064	lpd-8	IV	0.135884	-0.0833661	-0.089054
WBGene00003065	lpd-9	V	0.12232	-0.132677	-0.0103626
WBGene00003066	lpl-1	IV	0.207665	-0.254328	-0.123044
WBGene00003068	lrk-1	I	0.0527379	-0.189001	-0.223234
WBGene00003071	lrp-1	I	0.00925689	0.272677	0.285324
WBGene00003072	lrp-2	I	0.0624683	0.386817	0.074424
WBGene00003073	lrs-1	III	0.0496968	0.166132	-0.0540036
WBGene00003074	lrs-2	I	0.32029	-0.173528	-0.619438
WBGene00003075	lrx-1	V	0.118383	-0.201558	-0.149014
WBGene00003076	lsm-1	II	0.0237111	-0.47467	-0.392232
WBGene00003077	lsm-3	IV	0.00208979	0.00272317	-0.379214
WBGene00003078	lsm-4	II	0.363955	-0.120481	-0.144804
WBGene00003079	lsm-5	V	-0.0820713	-0.196434	-0.0490822
WBGene00003081	lsm-7	IV	-0.487809	-0.0296817	-0.0626657
WBGene00003083	lst-1	I	1.66458	-0.260384	-0.185314
WBGene00003084	lst-2	X	0.234243	0.850224	0.693488
WBGene00003085	lst-3	IV	0.197925	0.0102178	0.104751
WBGene00003086	lst-4	IV	-0.0310057	-0.0327507	-0.0581513
WBGene00003087	lsy-2	X	1.49944	-0.300383	-0.793728
WBGene00003089	ltd-1	II	0.370155	0.400979	0.347206
WBGene00003090	lys-1	V	0.124226	-0.182664	-0.0924731
WBGene00003091	lys-2	V	0.20057	0.0921772	0.082041
WBGene00003092	lys-3	V	-0.0378634	-0.26157	-0.0328479
WBGene00003093	lys-4	IV	-0.0855774	-0.103028	-0.00791888
WBGene00003094	lys-5	IV	-0.0214531	0.0198057	-0.141633
WBGene00003095	lys-6	IV	-0.243402	-0.326635	-0.172872
WBGene00003096	lys-7	V	-0.618909	-0.300656	-0.0392573
WBGene00003097	lys-8	II	-0.155133	-0.312656	0.0256053
WBGene00003098	lys-9	I	0.210119	0.140976	-0.242606
WBGene00003099	lys-10	IV	0.0828142	0.105278	-0.0165491
WBGene00003100	mab-3	II	0.142231	0.418615	0.232584
WBGene00003102	mab-5	III	-0.0600121	0.296136	0.0879848
WBGene00003104	mab-7	X	0.0919017	0.0593744	-0.0861537
WBGene00003106	mab-9	II	-0.122598	-0.00127341	0.111985
WBGene00003107	mab-10	II	0.123938	-0.197925	-0.230944
WBGene00003111	mab-20	I	-0.0748008	0.0755814	0.157083
WBGene00003112	mab-21	III	0.079827	-0.178164	0.00043595
WBGene00003119	mac-1	II	0.496482	-0.0616249	-0.20873
WBGene00003123	mag-1	I	0.0917825	-0.0550507	-0.11761
WBGene00003129	map-1	IV	0.226288	0.0389012	-0.167755
WBGene00003130	map-2	IV	0.444194	0.0896216	0.0416158
WBGene00003132	mat-1	I	0.0455863	0.0157264	-0.148369
WBGene00003133	mat-2	II	-0.391415	-0.120197	-0.0454338
WBGene00003134	mat-3	III	-0.038252	-0.136975	-0.222985
WBGene00003136	mau-2	I	-0.288945	-0.104397	-0.0339437
WBGene00003142	mau-8	IV	-0.455243	-0.108028	-0.0232941
WBGene00003143	max-1	V	0.0764856	1.05394	0.872852
WBGene00003144	max-2	II	-0.0151944	0.141507	0.129341
WBGene00003148	mbf-1	IV	0.150915	0.20721	-0.0942643
WBGene00003149	mbk-1	X	1.79908	1.01061	0.80723
WBGene00003150	mbk-2	IV	0.0480695	-0.0770889	0.0804005
WBGene00003151	mca-1	IV	0.00120006	0.463463	0.496048
WBGene00003153	mca-3	IV	0.321267	0.0363475	-0.0743294
WBGene00003154	mcm-2	II	0.0373261	0.0533783	-0.0935581
WBGene00003155	mcm-3	V	-0.0570821	0.0534241	0.044612
WBGene00003156	mcm-4	I	-0.285093	0.0113628	-0.110129
WBGene00003157	mcm-5	III	-0.23936	0.01407	-0.0239566
WBGene00003158	mcm-6	III	-0.226335	0.0306662	0.0135295
WBGene00003159	mcm-7	V	-0.180503	-0.0395302	0.075583
WBGene00003160	mdf-1	V	0.191008	0.0305874	-0.0349712
WBGene00003161	mdf-2	IV	0.259098	-0.139357	-0.147344
WBGene00003162	mdh-1	III	0.345134	-0.0922269	-0.0620474
WBGene00003163	mdl-1	X	0.119117	0.0625142	0.0430147
WBGene00003164	mdt-6	V	0.0338483	-0.0548582	-0.19287
WBGene00003165	mec-1	V	0.033256	0.0210421	0.0344604
WBGene00003166	mec-2	X	0.0570895	-0.220887	-0.14457
WBGene00003167	mec-3	IV	0.115419	0.0280632	-0.0345712
WBGene00003168	mec-4	X	-0.0215522	-0.0434499	-0.0742514
WBGene00003169	mec-5	X	0.150937	-0.0206767	0.0108306
WBGene00003170	mec-6	I	-0.333119	0.222379	0.0901535
WBGene00003171	mec-7	X	0.189467	-0.299362	-0.345382
WBGene00003172	mec-8	I	0.150279	0.426489	0.10177
WBGene00003173	mec-9	V	-0.00543372	-0.0721056	-0.0456369
WBGene00003174	mec-10	X	0.0608364	-0.0148383	-0.149089
WBGene00003175	mec-12	III	0.286587	-0.279405	-0.181369
WBGene00003176	mec-14	III	-0.0291226	0.0977893	0.17233
WBGene00003178	mec-17	IV	0.0346469	-0.068153	-0.031283
WBGene00003179	mec-18	X	0.0343323	-0.000640693	-0.145007
WBGene00003182	mef-2	I	0.257798	2.45768	1.91574
WBGene00003183	mei-1	I	-0.115531	-0.252499	-0.0143429
WBGene00003184	mei-2	I	0.213222	-0.0752163	-0.12289
WBGene00003185	mek-1	X	2.02733	0.535291	0.557348
WBGene00003186	mek-2	I	0.0854975	0.0191223	-0.136859
WBGene00003196	mel-11	II	-0.0262756	0.0234252	0.358254
WBGene00003209	mel-26	I	-0.0612466	-0.198711	-0.0277348
WBGene00003210	mel-28	III	-0.172343	-0.175267	0.120115
WBGene00003214	mel-32	III	0.0569741	0.139318	-0.0105132
WBGene00003218	mep-1	IV	-0.193067	0.0200045	0.087827
WBGene00003219	mes-1	X	0.105952	-0.557841	-0.000199541
WBGene00003220	mes-2	II	-0.45915	-2.76136	0.0301937
WBGene00003221	mes-3	I	-0.00409901	0.35261	0.414348
WBGene00003222	mes-4	V	-0.248831	-0.00154987	0.0101535
WBGene00003224	mes-6	IV	-0.0529449	-0.477466	-0.151288
WBGene00003225	mev-1	III	-0.0745642	-0.0837969	0.136826
WBGene00003228	mex-1	II	0.0578718	-0.0654718	0.0985119
WBGene00003229	mex-3	I	0.408981	-0.119708	0.164359
WBGene00003230	mex-5	IV	0.082105	0.0486176	0.125948
WBGene00003231	mex-6	II	0.631237	-0.129556	0.12328
WBGene00003232	mgl-1	X	-0.0305721	0.00776521	-0.0607122
WBGene00003233	mgl-2	I	-0.121599	0.525159	0.504662
WBGene00003234	mif-1	III	0.14227	-0.237555	-0.321188
WBGene00003235	mif-2	V	0.579066	0.679057	0.591846
WBGene00003236	mif-3	I	0.415432	0.175933	0.260726
WBGene00003237	mif-4	IV	-0.327953	0.231195	0.125291
WBGene00003238	mig-1	I	-0.0253401	-0.79546	-0.360215
WBGene00003239	mig-2	X	0.300743	1.02391	0.525127
WBGene00003241	mig-5	II	-0.247128	0.0672635	-0.0894313
WBGene00003243	mig-10	III	0.170066	0.804019	0.747556
WBGene00003245	mig-13	X	0.0994215	-0.15493	0.0840172
WBGene00003246	mig-14	II	-0.577959	-1.00221	-1.05105
WBGene00003247	mig-15	X	0.0814689	-0.0311937	-0.13194
WBGene00003248	mig-17	V	0.0164269	-0.0545582	-0.0476622
WBGene00003253	mig-22	III	0.256931	-0.0532162	-0.0153314
WBGene00003254	mig-23	X	0.465505	0.552757	0.541808
WBGene00003258	cogc-1	I	-0.418093	-0.199727	-0.0916217
WBGene00003367	mix-1	II	-0.200369	0.0848285	0.170998
WBGene00003368	mkk-4	X	-0.12076	-0.0438405	-0.357778
WBGene00003369	mlc-1	X	0.585248	-0.383015	-0.340193
WBGene00003371	mlc-3	III	0.218783	-0.318468	-0.277908
WBGene00003372	mlc-4	III	-0.0987511	0.112883	-0.0297483
WBGene00003373	mlh-1	III	0.0315351	-0.188507	-0.13387
WBGene00003374	mlk-1	V	0.0607868	0.0820793	0.0844886
WBGene00003375	mlp-1	III	0.229941	-0.260721	-0.179495
WBGene00003376	mls-1	III	0.0681973	0.0518838	-0.104116
WBGene00003377	mls-2	X	-0.139135	0.00171751	-0.00402298
WBGene00003378	mml-1	III	0.0868418	1.92622	1.48516
WBGene00003380	mnm-2	X	0.094798	-0.398514	-0.0801689
WBGene00003384	moc-1	X	0.150128	-0.355028	-0.408901
WBGene00003385	moc-2	V	0.153962	0.261546	-0.272039
WBGene00003386	mod-1	V	0.00554777	0.14471	0.320752
WBGene00003387	mod-5	I	0.323867	1.6898	1.77375
WBGene00003388	moe-3	II	0.0939313	0.13902	-0.122681
WBGene00003389	mog-1	III	0.0400167	0.117785	0.0481095
WBGene00003392	mog-4	II	0.263112	0.0481653	-0.0146411
WBGene00003393	mog-5	II	-0.0106062	-0.0480675	0.0320881
WBGene00003394	mom-1	X	0.178922	0.432943	0.290907
WBGene00003395	mom-2	V	0.567879	-0.290142	-0.0696993
WBGene00003396	mom-4	I	0.33452	0.100646	-0.208611
WBGene00003397	mom-5	I	0.171298	-0.00707344	-0.0630462
WBGene00003400	dapk-1	I	-0.0565405	-0.150109	-0.253405
WBGene00003401	mpk-1	III	0.0395689	0.0928092	-0.0100528
WBGene00003402	mpk-2	II	-0.0678725	-0.0535744	0.0172199
WBGene00003403	mps-1	II	0.209085	0.0197088	-0.0122937
WBGene00003404	mpz-1	II	0.0360265	0.174252	0.168762
WBGene00003405	mre-11	V	-0.0122186	0.000312693	-0.0708583
WBGene00003406	mrg-1	III	0.181981	-0.0562473	-0.0477076
WBGene00003407	mrp-1	X	0.134095	-0.164342	0.113591
WBGene00003408	mrp-2	X	0.00741753	-0.0204953	-0.0824035
WBGene00003409	mrp-3	X	-0.0355632	-0.0152432	0.0350053
WBGene00003410	mrp-4	X	0.195112	0.125104	0.077487
WBGene00003411	mrp-5	X	0.0735531	0.581453	0.682831
WBGene00003412	mrp-6	X	-0.0642494	0.614453	1.43023
WBGene00003413	mrp-7	V	0.399012	-0.50081	-0.364961
WBGene00003414	mrp-8	III	-0.149164	0.612553	1.05617
WBGene00003415	mrs-1	IV	0.108952	0.0707771	0.0404565
WBGene00003417	mrt-2	III	0.388743	-0.471404	-0.350564
WBGene00003418	msh-2	I	0.325701	0.0652927	-0.0309783
WBGene00003421	msh-5	IV	-0.124424	-0.231781	-0.260077
WBGene00003422	msh-6	I	-0.270936	-0.0641272	-0.0286744
WBGene00003423	msi-1	III	0.356245	1.27939	1.64946
WBGene00003471	mtd-1	I	0.191371	0.0330861	-0.2803
WBGene00003472	mtk-1	I	0.123374	0.0985986	0.0472043
WBGene00003475	mtm-1	I	-0.473284	-0.519143	-0.37964
WBGene00003476	mtm-3	III	0.00606701	-0.0459142	0.0381922
WBGene00003477	mtm-5	X	-0.019492	-0.120827	-0.0176458
WBGene00003478	mtm-6	III	-0.323122	-0.155163	0.00516956
WBGene00003479	mtm-9	V	-0.00425792	-0.119331	-0.0806974
WBGene00003480	mua-1	II	0.00176447	0.0842204	0.0875031
WBGene00003482	mua-3	III	0.0162449	0.0372081	0.172283
WBGene00003485	mua-6	X	-0.107564	0.0441642	0.058434
WBGene00003495	mup-2	X	0.0961729	-0.46517	-0.445673
WBGene00003497	mup-4	III	0.215454	2.36172	2.32003
WBGene00003499	mut-2	I	-0.00325048	-0.170223	0.0251877
WBGene00003504	mut-7	III	-0.185738	0.00261131	-0.0955399
WBGene00003507	mut-14	V	-0.0619589	0.0903845	-0.0258859
WBGene00003508	mut-16	I	0.0416359	-0.559459	-0.0521222
WBGene00003509	mxl-1	V	0.29014	0.210066	0.0888258
WBGene00003510	mxl-2	III	0.0487505	-0.47028	-0.619311
WBGene00003511	mxl-3	X	-0.144617	-0.0910543	0.00484976
WBGene00003514	myo-2	X	-0.0485729	-0.131368	-0.0627332
WBGene00003515	myo-3	V	-0.0352524	-0.215275	-0.126215
WBGene00003516	nab-1	I	-0.108177	2.4569	2.26056
WBGene00003517	nac-1	X	0.0152011	-0.00241881	-0.027425
WBGene00003518	nac-2	III	-0.014371	0.140789	0.0273244
WBGene00003519	nac-3	III	0.232193	-0.162915	-0.118829
WBGene00003520	nas-1	III	0.165854	0.241558	0.121747
WBGene00003522	nas-3	V	-0.0640845	-0.0361219	-0.00506395
WBGene00003523	nas-4	III	0.00836777	-0.0380431	-0.127395
WBGene00003524	nas-5	I	-0.107667	0.0798307	-0.054719
WBGene00003525	nas-6	IV	0.0335334	-0.041431	-0.126821
WBGene00003526	nas-7	II	0.050588	-0.0370214	-0.146982
WBGene00003527	nas-8	IV	0.0296278	0.0613244	0.0631393
WBGene00003528	nas-9	V	0.214925	-0.219422	-0.172214
WBGene00003529	nas-10	X	-0.0673909	-0.14575	-0.0189242
WBGene00003530	nas-11	X	0.205024	-0.0576974	-0.0810689
WBGene00003531	nas-12	IV	0.05509	-0.0690621	-0.0275029
WBGene00003532	nas-13	X	-0.0511841	-0.0640124	-0.0489653
WBGene00003533	nas-14	IV	-0.238937	0.363913	0.334982
WBGene00003534	nas-15	X	-0.132178	-0.153861	-0.195925
WBGene00003535	nas-16	V	-0.04297	-0.0161178	0.082623
WBGene00003536	nas-17	V	-0.0303339	0.0226334	0.103255
WBGene00003537	nas-18	V	-0.163739	0.112473	0.122704
WBGene00003538	nas-19	V	0.0967088	-0.0217328	-0.0735932
WBGene00003539	nas-20	V	0.170819	0.582738	0.60292
WBGene00003540	nas-21	V	0.146311	0.25993	0.051284
WBGene00003541	nas-22	V	0.0521547	-0.0249856	0.130862
WBGene00003542	nas-23	II	-0.169202	0.0281872	-0.0858703
WBGene00003543	nas-24	V	-0.0130746	0.0982568	-0.0567937
WBGene00003544	nas-25	II	-0.0609613	-0.0723832	-0.103318
WBGene00003545	nas-27	II	-0.058609	-0.0985559	-0.165862
WBGene00003546	nas-28	III	-0.0710129	0.434845	0.416684
WBGene00003547	nas-29	II	-0.0472706	-0.161087	0.0443503
WBGene00003548	nas-30	I	0.0486114	-0.0804544	-0.0733915
WBGene00003549	nas-31	V	0.0250031	-0.144081	-0.0614654
WBGene00003550	nas-32	V	0.205135	-0.212671	-0.191276
WBGene00003551	nas-33	X	0.0284352	0.0566724	-0.147077
WBGene00003552	nas-36	I	-0.0137117	0.0653597	0.202361
WBGene00003553	nas-37	X	-0.0243571	-0.0214607	-0.0742234
WBGene00003554	nas-38	X	0.0512128	-0.0894013	-0.158392
WBGene00003555	nas-39	X	0.0506573	-0.110101	-0.071053
WBGene00003557	nca-1	IV	-0.037416	0.0452398	-0.00681117
WBGene00003558	nca-2	III	-0.0790981	1.45098	0.505289
WBGene00003559	ncl-1	III	0.158998	-0.0601826	0.0153641
WBGene00003561	ncr-1	X	-0.119597	0.022928	-0.0178192
WBGene00003562	ncr-2	III	-0.0268525	0.0557005	0.0865418
WBGene00003563	ncs-1	X	0.0432691	-0.0857496	0.0543462
WBGene00003564	ncs-2	I	-0.269021	-0.534099	-0.272915
WBGene00003565	ncs-3	X	-0.0602554	-0.167528	0.228438
WBGene00003566	ncx-1	V	-0.0344584	-0.496995	-0.463374
WBGene00003567	ncx-2	V	-0.105679	-0.174841	-0.0667168
WBGene00003568	ncx-3	IV	-0.0789088	-0.035974	-0.155577
WBGene00003569	ncx-4	I	-0.0219646	1.9328	1.34063
WBGene00003570	ncx-5	V	-0.153024	0.0516616	0.0347426
WBGene00003571	ncx-6	III	0.00308954	-0.0255964	0.00226319
WBGene00003572	ncx-7	III	-0.0358832	0.0509793	0.0274967
WBGene00003573	ncx-8	V	0.113814	-0.00171944	-0.00941946
WBGene00003574	ncx-9	V	0.15307	0.00131642	-0.0666962
WBGene00003575	ncx-10	V	-0.16935	0.013844	-0.0375187
WBGene00003576	ndc-80	IV	-0.0812318	0.00315106	0.175599
WBGene00003577	ndg-4	III	0.00579413	0.538372	0.459591
WBGene00003578	ndx-1	I	0.024949	0.0210574	-0.186568
WBGene00003579	ndx-2	V	0.48322	3.29059	0.279816
WBGene00003580	ndx-3	II	0.0631328	0.0453859	-0.516422
[truncated: 15,988 more rows]

## Sheet: Figure 2-figure suppl 3 source 
Figure 2–figure supplement 3 source data
mes
strain	RNAi	fully tumorous	eggs, but distal or proximal tumor	wild type	n=
glp rrf	EV 1	3	10	25	38
glp	EV 1	6	12	20	38
glp rrf	EV 2	3	8	40	51
glp	EV 2	7	16	13	36
glp rrf	EV 3	2	9	40	51
glp	EV 3	7	22	17	46
glp rrf	mes-6	17	13	30	60
glp	mes-6	27	32	16	75
glp rrf	mes-2	1	4	34	39
glp	mes-2	8	15	17	40
glp rrf	mes-3	2	17	28	47
glp	mes-3	16	26	17	59
suppressor
strain	RNAi	fully tumorous	eggs, but distal or proximal tumor	wild type		supposedly	worked
glp rrf	EV 2	3	8	40	51	control	yes
glp	EV 2	7	16	13	36	control	yes
glp rrf	EV 3	2	9	40	51	control	yes
glp	EV 3	7	22	17	46	control	yes
glp rrf	EV 1	3	10	25	38	control	yes
glp	EV 1	6	12	20	38	control	yes
glp rrf	lst-1	0	6	59	65	control supressor	yes
glp	lst-1	2	13	15	30	control supressor	yes
glp rrf	sygl-1	1	8	42	51	control supressor	yes
glp	sygl-1	0	13	13	26	control supressor	yes
glp rrf	lag-1	0	6	36	42	control supressor	yes
glp	lag-1	0	20	29	49	control supressor	yes
glp rrf	F55	1	4	45	50	suppressor	yes
glp	F55	4	12	43	59	suppressor	yes
glp rrf	bath-13	0	1	37	38	suppressor	no
glp	bath-13	10	16	22	48	suppressor	no
glp rrf	apm-3	2	6	33	41	suppressor	no
glp	apm-3	13	21	18	52	suppressor	no
glp rrf	F40	5	9	34	48	suppressor
glp	F40	19	13	24	56	suppressor
glp rrf	epn-1	5	7	33	45	suppressor
glp	epn-1	14	21	27	62	suppressor
glp rrf	F54	6	8	29	43	suppressor
glp	F54	17	25	13	55	suppressor
glp rrf	qdpr-1	3	16	21	40	suppressor	no
glp	qdpr-1	9	11	15	35	suppressor	no
glp rrf	ucr-2.1	4	9	37	50	suppressor	no
glp	ucr-2.1	12	19	14	45	suppressor	no
glp rrf	lnp-1	17	17	32	66	supressor	no
glp	lnp-1	16	7	10	33	suppressor	no
	T27 not done
	gas-1 too sick
enhancers
strain	RNAi	fully tumorous	eggs, but distal or proximal tumor	wild type		supposedly	worked
glp rrf	EV 2	3	8	40	51	control	yes
glp	EV 2	7	16	13	36	control	yes
glp rrf	EV 3	2	9	40	51	control	yes
glp	EV 3	7	22	17	46	control	yes
glp rrf	EV 1	3	10	25	38	control	yes
glp	EV 1	6	12	20	38	control	yes
glp rrf	puf-9	3	22	21	46	enhancer	yes
glp	puf-9	9	29	10	48	enhancer	yes
glp rrf	F47	13	5	33	51	enhancer	yes
glp	F47	24	8	20	52	enhancer	yes
glp rrf	lnp-1	17	17	32	66	suppressor	no
glp	lnp-1	16	7	10	33	suppressor	no
glp rrf	mbk-1	0	6	39	45	sup/enh	yes
glp	mbk-1	21	13	8	42	sup/enh	yes
glp rrf	B04	1	5	38	44	enhancer	yes
glp	B04	18	11	15	44	enhancer	yes
glp rrf	pmk-3	1	1	44	46	enhancer	no
glp	pmk-3	8	13	22	43	enhancer	no
