# Supplementary material for: Increasing Notch signaling antagonizes PRC2-mediated silencing to promote reprograming of germ cells into neurons
Source: eLife. 2016 Sep 7;5:e15477. doi: 10.7554/eLife.15477 (PMC5045294; doi:10.7554/eLife.15477)
Supplement: Figure 3—source data 1. — (A) Quantification of GeCo+ phenotype upon RNAi against PRC2 subunits in glp-1(ar202) mutants. (B) Quantification of GeCo in different genetic backgrounds with highly proliferative germlines upon RNAi against PRC2 subunits. More details can be found in the corresponding figure legends. DOI: http://dx.doi.org/10.7554/eLife.15477.015 [file elife-15477-fig3-data1.xlsx]

## Sheet: Figure 3-source data 3A_B
Figure 3-source data 3A
	wild type mes-2 RNAi						glp-1(ar202) mes-2 RNAi
		none	GeCo+	GeCo	all animals (N)			none	GeCo+	GeCo	all animals (N)
	Biol. Repl. 1	30	0	6	36		Biol. Repl. 1	214	15	17	246
	Biol. Repl. 2	176	0	19	195		Biol. Repl. 2	368	31	33	432
	Biol. Repl. 3	79	1	8	88		Biol. Repl. 3	99	8	6	113
		none	GeCo+	GeCo				none	GeCo+	GeCo
		0.833333	0	0.166667				0.869919	0.0609756	0.0691057
		0.902564	0	0.0974359				0.851852	0.0717593	0.0763889
		0.897727	0.0113636	0.0909091				0.876106	0.0707965	0.0530973
								86.5959	6.78438	6.61973
		87.7875	0.378788	11.8337				0.594097	0.281309	0.56168
		1.82197	0.309279	1.97903
	wild type mes-3 RNAi						glp-1(ar202) mes-3 RNAi
		none	GeCo+	GeCo	all animals (N)			none	GeCo+	GeCo	all animals (N)
	Biol. Repl. 1	103	1	20	124		Biol. Repl. 1	714	76	23	813
	Biol. Repl. 2	56	0	6	62		Biol. Repl. 2	391	45	23	459
	Biol. Repl. 3	226	0	64	290		Biol. Repl. 3	84	11	11	106
		none	GeCo+	GeCo				none	GeCo+	GeCo
		0.830645	0.00806452	0.16129				0.878229	0.0934809	0.0282903
		0.903226	0	0.0967742				0.851852	0.0980392	0.0501089
		0.77931	0	0.22069				0.792453	0.103774	0.103774
								84.0844	9.84312	6.07243
		83.7727	0.268817	15.9585				2.0711	0.243127	1.83118
		2.93499	0.219488	2.92155
	wild type mes-6 RNAi						glp-1(ar202) mes-6 RNAi
		none	GeCo+	GeCo	all animals (N)			none	GeCo+	GeCo	all animals (N)
	Biol. Repl. 1	23	0	3	26		Biol. Repl. 1	436	16	15	467
	Biol. Repl. 2	69	0	3	72		Biol. Repl. 2	110	3	9	122
	Biol. Repl. 3	94	1	7	102		Biol. Repl. 3	124	5	14	143
		none	GeCo+	GeCo				none	GeCo+	GeCo
		0.884615	0	0.115385				0.933619	0.0342612	0.0321199
		0.958333	0	0.0416667				0.901639	0.0245902	0.0737705
		0.921569	0.00980392	0.0686275				0.867133	0.034965	0.0979021
								90.0797	3.12721	6.79308
		92.1506	0.326797	7.52262				1.56747	0.273295	1.56872
		1.73755	0.266829	1.75831
		mes-2 RNAi		mes-3 RNAi		mes-3 RNAi
		wt	glp-1(ar202)	wt	glp-1(ar202)	wt	glp-1(ar202)
	none	87.7875	86.5959	83.7727	84.0844	92.1506	90.0797
	STDEV	1.82197	0.594097	2.93499	2.0711	1.73755	1.56747
	GeCo+	0.378788	6.78438	0.268817	9.84312	0.326797	3.12721
	STDEV	0.309279	0.281309	0.219488	0.243127	0.266829	0.273295
	GeCo	11.8337	6.61973	15.9585	6.07243	7.52262	6.79308
	STDEV	1.97903	0.56168	2.92155	1.83118	1.75831	1.56872
		p1	0.0006	p3	0.0536	p5	0.4035
		p2	0.0001	p4	0.0001	p6	0.0003
		Statistical analysis by Student's t-test
Figure 3-source data 3B
	mock
	gld-1, gld-2/++; glp-1/+			gld-1, gld-2; glp-1			gld-1, gld-2; glp-1/+
	GeCo	no GeCo	all animals (N)	GeCo	no GeCo	all animals	GeCo	no GeCo	all animals (N)
	0	309	309	0	22	22	0	10	10
	0	249	249	0	43	43	0	47	47
	0	167	167	0	25	25	0	35	35
	0	100	100	0	19	19	0	13	13
	0	299	299	0	30	30			0
			1124			139			105
	gld-1, gld-2/++; glp-1/+			gld-1, gld-2; glp-1			gld-1, gld-2; glp-1/+
	GeCo	no GeCo	standard error	GeCo	no GeCo	standard error	GeCo	no GeCo	standard error
	0	1		0	1		0	1
	0	1		0	1		0	1
	0	1		0	1		0	1
	0	1		0	1		0	1
	0	1		0	1
	0		0	0		0	0		0
	mes-2 RNAi
	gld-1, gld-2/++; glp-1/+			gld-1, gld-2; glp-1			gld-1, gld-2; glp-1/+
	GeCo	no GeCo	all animals (N)	GeCo	no GeCo	all animals	GeCo	no GeCo	all animals (N)
	3	32	35	0	8	8	1	8	9
	25	274	299	7	63	70	2	27	29
	14	175	189	2	28	30
	6	71	77	0	10	10	1	7	8
				0	19	19			0
			600			137			46
	gld-1, gld-2/++; glp-1/+			gld-1, gld-2; glp-1			gld-1, gld-2; glp-1/+
	GeCo	no GeCo	standard error	GeCo	no GeCo	standard error	GeCo	no GeCo	standard error
	0.0857143	0.914286		0	1		0.111111	0.888889
	0.083612	0.916388		0.1	0.9		0.0689655	0.931034
	0.0740741	0.925926		0.0666667	0.933333
	0.0779221	0.922078		0	1		0.125	0.875
				0	1
	8.03306		0.230077	3.33333		1.88562	10.1692		1.37558
					p1=	0.0456		p2=	0.0337	Student's t-test
	mes-3 RNAi
	gld-1, gld-2/++; glp-1/+			gld-1, gld-2; glp-1			gld-1, gld-2; glp-1/+
	GeCo	no GeCo	all animals (N)	GeCo	no GeCo	all animals	GeCo	no GeCo	all animals (N)
	7	67	74	1	19	20	0	0	0
	28	438	466	2	66	68	0	10	10
	8	118	126	0	12	12	2	34	36
	7	35	42				2	9	11
	12	86	98	0	11	11	2	11	13
			806			111			70
	gld-1, gld-2/++; glp-1/+			gld-1, gld-2; glp-1			gld-1, gld-2; glp-1/+
	GeCo	no GeCo	standard error	GeCo	no GeCo	standard error	GeCo	no GeCo	standard error
	0.0945946	0.905405		0.05	0.95
	0.0600858	0.939914		0.0294118	0.970588		0	1
	0.0634921	0.936508		0	1		0.0555556	0.944444
	0.166667	0.833333					0.181818	0.818182
	0.122449	0.877551		0	1		0.153846	0.846154
	10.1458		1.77685	1.98529		1.05726	9.7805		3.66995
					p3=	0.007		p4=	0.0637	Student's t-test
	mes-6 RNAi
	gld-1, gld-2/++; glp-1/+			gld-1, gld-2; glp-1			gld-1, gld-2; glp-1/+
	GeCo	no GeCo	all animals (N)	GeCo	no GeCo	all animals	GeCo	no GeCo	all animals (N)
	12	30	42	0	7	7	1	2	3
	14	36	50	1	5	6	0	1	1
	1	21	22	0	5	5	0	6	6
	3	23	26	0	2	2	1	5	6
	5	22	27	1	4	5	2	4	6
	1	21	22	0	5	5	2	7	9
	3	23	26	0	2	2	0	3	3
	1	30	31	0	5	5	0	3	3
	6	61	67	2	10	12	0	1	1
	6	66	72	1	17	18	0	23	23
	19	218	237	1	66	67	2	36	38
	14	172	186	0	28	28	0	1	1
	19	150	169	0	20	20
	5	37	42	0	8	8
	109		1019	6		190	8		100
	gld-1, gld-2/++; glp-1/+			gld-1, gld-2; glp-1			gld-1, gld-2; glp-1/+
	GeCo	no GeCo	standard error	GeCo	no GeCo	standard error	GeCo	no GeCo	standard error
	0.285714	0.714286		0	1		0.333333	0.666667
	0.28	0.72		0.166667	0.833333		0	1
	0.0454545	0.954545		0	1		0	1
	0.115385	0.884615		0	1		0.166667	0.833333
	0.185185	0.814815		0.2	0.8		0.333333	0.666667
	0.0454545	0.954545		0	1		0.222222	0.777778
	0.115385	0.884615		0	1		0	1
	0.0322581	0.967742		0	1		0	1
	0.0895522	0.910448		0.166667	0.833333		0	1
	0.0833333	0.916667		0.0555556	0.944444		0	1
	0.0801688	0.919831		0.0149254	0.985075		0.0526316	0.947368
	0.0752688	0.924731		0	1		0	1
	0.112426	0.887574		0	1
	0.119048	0.880952		0	1
	11.8902		2.04623	4.31296		1.92755	9.23489		3.72504
					p5=	0.008		p6=	0.1259	Student's t-test
				mock	mes-2 RNAi	mes-3 RNAi	mes-6 RNAi
			gld-1, gld-2/++; glp-1/+	0	8.03306	10.1458	11.8902
				0	1.77685	1.77685	2.04623
			gld-1, gld-2; glp-1	0	3.33333	1.98529	4.31296
				0	1.88562	1.05726	1.92755
			gld-1, gld-2; glp-1/+	0	10.1692	9.7805	9.23489
				0	1.37558	3.66995	3.72504
