# Supplementary material for: Increasing Notch signaling antagonizes PRC2-mediated silencing to promote reprograming of germ cells into neurons
Source: eLife. 2016 Sep 7;5:e15477. doi: 10.7554/eLife.15477 (PMC5045294; doi:10.7554/eLife.15477)
Supplement: Figure 4—source data 1. — (A) Quantification of GeCo+ upon RNAi against lin-53 and Notch-activated genes. (B) Quantification of GeCo+ upon RNAi against lin-53 and Histone demethylases. Figure 4—figure supplement 1A source data: Quantification of GeCo+ upon RNAi against lin-53 and utx-1 with and without rrf-1 (pk1417) background. More details can be found in the corresponding figure legends. DOI: http://dx.doi.org/10.7554/eLife.15477.017 [file elife-15477-fig4-data1.xlsx]

## Sheet: Figure 4-source data 4A_B
Figure 4-source data 4A
T27F6.4 mixed with mock						C07G1.6 mixed with mock
	none	GeCo+	GeCo	all animals (N)			none	GeCo+	GeCo+	all animals (N)
Biol. Repl. 1	63	1	8	72		Biol. Repl. 1	81	0	0	81
Biol. Repl. 2	44	0	4	48		Biol. Repl. 2	102	0	1	103
Biol. Repl. 3	57	0	1	58		Biol. Repl. 3	80	0	0	80
Biol. Repl. 4	217	7	6	230		Biol. Repl. 4	197	2	0	199
Biol. Repl. 5	55	0	1	56		Biol. Repl. 5	35	0	4	39
	none	GeCo+	GeCo				none	GeCo+	GeCo
	0.875	0.0138889	0.111111				1	0	0
	0.916667	0	0.0833333				0.990291	0	0.00970874
	0.982759	0	0.0172414				1	0	0
	0.943478	0.0304348	0.026087				0.98995	0.0100503	0
	0.982143	0	0.0178571				0.897436	0	0.102564
	94.0009	0.886473	5.1126				97.5535	0.201005	2.24546
	1.83149	0.538984	1.73407				1.75751	0.179784	1.79918
						mixed with lin-53
mixed with lin-53							none	GeCo+	GeCo	all animals (N)
	none	GeCo+	GeCo	all animals (N)			34	3	0	37
	54	5	8	67			56	3	1	60
	42	2	1	45			18	2	0	20
	56	12	11	79			39	3	1	43
	96	30	20	146			58	15	16	89
	14	4	9	27			44	4	3	51
							249	30	21	300
	none	GeCo+	GeCo				none	GeCo+	GeCo
	0.80597	0.0746269	0.119403				0.918919	0.0810811	0
							0.933333	0.05	0.0166667
	0.708861	0.151899	0.139241				0.9	0.1	0
	0.657534	0.205479	0.136986				0.906977	0.0697674	0.0232558
	0.518519	0.148148	0.333333
	67.2721	14.5038	18.2241				0.862745	0.0784314	0.0588235
	5.18836	2.3275	4.37854				90.4395	7.5856	1.97492
							1.06001	0.727316	0.965125
F20D1.1 mixed with mock						B0416.5 mixed with mock
	none	GeCo+	GeCo	all animals (N)			none	GeCo+	GeCo	all animals (N)
Biol. Repl. 1	107	0	0	107		Biol. Repl. 1	93	2	2	97
Biol. Repl. 2	43	0	0	43		Biol. Repl. 2	81	2	0	83
Biol. Repl. 3	55	0	1	56		Biol. Repl. 3	81	3	2	86
Biol. Repl. 4	143	0	0	143		Biol. Repl. 4	118	0	0	118
Biol. Repl. 5	348	0	1	349		Biol. Repl. 5	53	1	0	54
	none	GeCo+	GeCo				none	GeCo+	GeCo
	1	0	0				0.958763	0.0206186	0.0206186
	1	0	0				0.975904	0.0240964	0
	0.982143	0	0.0178571				0.94186	0.0348837	0.0232558
	1	0	0				1	0	0
	99.5536	0	0.446429				0.981481	0.0185185	0
	0.386618	0	0.386618				97.1602	1.96234	0.877487
							0.888134	0.506033	0.482065
						mixed with lin-53
							none	GeCo+	GeCo	all animals (N)
mixed with lin-53						Biol. Repl. 1	58	4	11	73
	none	GeCo+	GeCo	all animals (N)		Biol. Repl. 2	30	2	7	39
Biol. Repl. 1	69	6	19	94		Biol. Repl. 3	18	5	2	25
Biol. Repl. 2	34	1	4	39		Biol. Repl. 4	21	1	1	23
Biol. Repl. 3	20	6	3	29		Biol. Repl. 5	17	6	1	24
Biol. Repl. 4	14	5	0	19		Biol. Repl. 6	63	7	9	79
Biol. Repl. 5	34	5	7	46		Biol. Repl. 7	31	7	5	43
							none	GeCo+	GeCo
	none	GeCo+	GeCo				0.794521	0.0547945	0.150685
	0.734043	0.0638298	0.202128				0.769231	0.0512821	0.179487
							0.72	0.2	0.08
	0.689655	0.206897	0.103448				0.913043	0.0434783	0.0434783
	0.736842	0.263158	0				0.708333	0.25	0.0416667
	0.73913	0.108696	0.152174				0.797468	0.0886076	0.113924
	72.4918	16.0645	11.4437				0.72093	0.162791	0.116279
	1.02192	3.93065	3.73583				77.479	12.1565	10.3646
							2.48948	3.82328	2.4091
lin-15B mixed with mock						C07G1.7 mixed with mock
	none	GeCo+	GeCo	all animals (N)			none	GeCo+	GeCo	all animals (N)
Biol. Repl. 1	73	2	1	76		Biol. Repl. 1	162	1	5	168
Biol. Repl. 2	83	0	0	83		Biol. Repl. 2	92	0	2	94
Biol. Repl. 3	63	0	0	63		Biol. Repl. 3	43	0	2	45
Biol. Repl. 4	122	0	0	122		Biol. Repl. 4	125	0	0	125
Biol. Repl. 5	65	4	1	70		Biol. Repl. 5	60	0	1	61
	none	GeCo+	GeCo
	0.960526	0.0263158	0.0131579				none	GeCo+	GeCo
	1	0	0				0.964286	0.00595238	0.0297619
	1	0	0				0.978723	0	0.0212766
	1	0	0				0.955556	0	0.0444444
	0.928571	0.0571429	0.0142857				1	0	0
	97.782	1.66917	0.548872				0.983607	0	0.0163934
	1.2962	1.01287	0.301052				97.6434	0.119048	2.23753
							0.69153	0.106479	0.65704
						mixed with lin-53
							none	GeCo+	GeCo	all animals (N)
mixed with lin-53						Biol. Repl. 1	54	9	14	77
	none	GeCo+	GeCo	all animals (N)		Biol. Repl. 2	42	1	2	45
Biol. Repl. 1	78	6	13	97		Biol. Repl. 3	41	12	12	65
Biol. Repl. 2	62	7	11	80		Biol. Repl. 4	38	6	4	48
Biol. Repl. 3	12	5	4	21		Biol. Repl. 5	55	15	15	85
Biol. Repl. 4	31	7	5	43		Biol. Repl. 6	18	5	2	25
Biol. Repl. 5	42	5	5	52
Biol. Repl. 6	34	8	2	44
							none	GeCo+	GeCo
amount of nuclei	none	GeCo+	GeCo				0.701299	0.116883	0.181818
	0.804124	0.0618557	0.134021
	0.775	0.0875	0.1375				0.630769	0.184615	0.184615
							0.791667	0.125	0.0833333
	0.72093	0.162791	0.116279				0.647059	0.176471	0.176471
	0.807692	0.0961538	0.0961538				0.72	0.2	0.08
	0.772727	0.181818	0.0454545				69.8159	16.0594	14.1247
	77.6095	11.8024	10.5882				2.55994	1.49124	2.17924
	1.39136	2.06288	1.50276
aldo-1 mixed with mock						tag-123 mixed with mock
	none	GeCo+	GeCo	all animals (N)			none	GeCo+	GeCo	all animals (N)
Biol. Repl. 1	55	0	1	56		Biol. Repl. 1	94	0	1	95
Biol. Repl. 2	93	0	1	94		Biol. Repl. 2	84	0	0	84
Biol. Repl. 3	42	0	0	42		Biol. Repl. 3	71	2	2	75
Biol. Repl. 4	105	0	2	107		Biol. Repl. 4	168	0	0	168
Biol. Repl. 5	98	6	0	104		Biol. Repl. 5	133	1	2	136
Biol. Repl. 6	45	0	0	45		Biol. Repl. 6	56	2	3	61
	none	GeCo+	GeCo				none	GeCo+	GeCo
	0.982143	0	0.0178571				0.989474	0	0.0105263
	0.989362	0	0.0106383				1	0	0
	1	0	0				0.946667	0.0266667	0.0266667
	0.981308	0	0.0186916				1	0	0
	0.942308	0.0576923	0				0.977941	0.00735294	0.0147059
	1	0	0				0.918033	0.0327869	0.0491803
	98.252	0.961538	0.78645				97.2019	1.11344	1.68465
	0.79522	0.877761	0.337608				1.23185	0.551842	0.698023
mixed with lin-53						mixed with lin-53
	none	GeCo+	GeCo	all animals (N)			none	GeCo+	GeCo	all animals (N)
Biol. Repl. 1	91	13	6	110		Biol. Repl. 1	91	10	13	114
Biol. Repl. 2	89	6	15	110		Biol. Repl. 2	55	11	5	71
Biol. Repl. 3	13	2	2	17		Biol. Repl. 3	19	3	1	23
Biol. Repl. 4	109	1	3	113		Biol. Repl. 4	32	2	7	41
Biol. Repl. 5	94	22	21	137		Biol. Repl. 5	29	6	2	37
Biol. Repl. 6	24	1	0	25		Biol. Repl. 6	18	2	1	21
	none	GeCo+	GeCo				none	GeCo+	GeCo
	0.827273	0.118182	0.0545455				0.798246	0.0877193	0.114035
	0.809091	0.0545455	0.136364				0.774648	0.15493	0.0704225
	0.764706	0.117647	0.117647				0.826087	0.130435	0.0434783
	0.964602	0.00884956	0.0265487				0.780488	0.0487805	0.170732
							0.783784	0.162162	0.0540541
	0.96	0.04	0				0.857143	0.0952381	0.047619
	86.5134	6.78448	6.7021				80.3399	11.3211	8.33901
	3.66352	1.94389	2.33725				1.19792	1.62937	1.86107
mek-1 mixed with mock						ZC84.3 mixed with mock
	none	GeCo+	GeCo	all animals (N)			none	GeCo+	GeCo	all animals (N)
Biol. Repl. 1	74	0	0	74		Biol. Repl. 1	80	6	15	101
Biol. Repl. 2	85	0	0	85		Biol. Repl. 2	93	4	7	104
Biol. Repl. 3	78	0	1	79		Biol. Repl. 3	58	1	2	61
Biol. Repl. 4	48	0	2	50		Biol. Repl. 4	60	0	0	60
Biol. Repl. 5	285	0	3	288		Biol. Repl. 5	66	1	1	68
	none	GeCo+	GeCo				none	GeCo+	GeCo
	1	0	0				0.792079	0.0594059	0.148515
	1	0	0				0.894231	0.0384615	0.0673077
	0.987342	0	0.0126582				0.95082	0.0163934	0.0327869
	0.96	0	0.04				1	0	0
	98.6835	0	1.31646				0.970588	0.0147059	0.0147059
	0.816627	0	0.816627				92.1544	2.57934	5.26631
							3.28176	0.930994	2.36738
mixed with lin-53						mixed with lin-53
	none	GeCo+	GeCo	all animals (N)			none	GeCo+	GeCo	all animals (N)
Biol. Repl. 1	56	12	11	79		Biol. Repl. 1	38	4	12	54
Biol. Repl. 2	14	0	2	16		Biol. Repl. 2	80	10	14	104
Biol. Repl. 3	6	4	1	11		Biol. Repl. 3	40	4	19	63
Biol. Repl. 4	29	1	4	34		Biol. Repl. 4	56	10	13	79
Biol. Repl. 5	49	9	7	65		Biol. Repl. 5	62	14	20	96
Biol. Repl. 6	33	1	2	36		Biol. Repl. 6	41	6	8	55
	none	GeCo+	GeCo				none	GeCo+	GeCo
	0.708861	0.151899	0.139241				0.703704	0.0740741	0.222222
							0.769231	0.0961538	0.134615
	0.545455	0.363636	0.0909091				0.634921	0.0634921	0.301587
	0.852941	0.0294118	0.117647				0.708861	0.126582	0.164557
	0.753846	0.138462	0.107692				0.645833	0.145833	0.208333
							0.745455	0.109091	0.145455
	71.5276	17.0852	11.3872				70.1334	10.2538	19.6128
	5.55202	6.0508	0.874391				1.97975	1.16322	2.3154
utx-1 mixed with mock
	none	GeCo+	GeCo	all animals (N)
Biol. Repl. 1	32	0	0	32
Biol. Repl. 2	322	8	10	340
	none	GeCo+	GeCo
	1	0	0
	0.947059	0.0235294	0.0294118
	97.3529	1.17647	1.47059
	1.87175	0.83189	1.03986
mixed with lin-53
	none	GeCo+	GeCo
Biol. Repl. 1	168	2	9	179
Biol. Repl. 2	420	7	18	445
Biol. Repl. 3	84	4	3	91
	none	GeCo+	GeCo
	0.938547	0.0111732	0.0502793
	0.94382	0.0157303	0.0404494
	0.923077	0.043956	0.032967
	93.5148	2.36199	4.12319
	0.508238	0.837141	0.409303
mixed with mock RNAi	lin-53/eV	T27F6.4/eV	C07G1.6/eV	F20D1.1/eV	B0416.5/eV	lin-15B/eV	C07G1.7/eV	aldo-1/eV	tag-123/eV	mek-1/eV	ZC84.3/eV	utx-1/eV
none	70.8043	94.0009	97.5535	99.5536	97.1602	97.782	97.6434	98.252	97.2019	98.6835	92.1544	97.3529
STDEV	2.33727	1.83149	1.75751	0.386618	0.888134	1.2962	0.69153	0.79522	1.23185	0.816627	3.28176	1.87175
GeCo+	13.7514	0.886473	0.201005	0	1.96234	1.66917	0.119048	0.961538	1.11344	0	2.57934	1.17647
STDEV	1.70184	0.538984	0.179784	0	0.506033	1.01287	0.106479	0.877761	0.551842	0	0.930994	0.83189
GeCo	15.4443	5.1126	2.24546	0.446429	0.877487	0.548872	2.23753	0.78645	1.68465	1.31646	5.26631	1.47059
STDEV	1.38064	1.73407	1.79918	0.386618	0.482065	0.301052	0.65704	0.337608	0.698023	0.816627	2.36738	1.03986
mixed with lin-53 RNAi	lin-53/eV	T27F6.4/lin-53	C07G1.6/lin-53	F20D1.1/lin-53	B0416.5/lin-53	lin-15B/lin-53	C07G1.7/lin-53	aldo-1/lin-53	tag-123/lin-53	mek-1/lin-53	ZC84.3/lin-53	utx-1/lin-53
none	70.8043	67.2721	90.4395	72.4918	77.479	77.6095	69.8159	86.5134	80.3399	71.5276	70.1334	93.5148
STDEV	2.33727	5.18836	1.06001	1.02192	2.48948	1.39136	2.55994	3.66352	1.19792	5.55202	1.97975	0.508238
GeCo+	13.7514	14.5038	7.5856	16.0645	12.1565	11.8024	16.0594	6.78448	11.3211	17.0852	10.2538	2.36199
STDEV	1.70184	2.3275	0.727316	3.93065	3.82328	2.06288	1.49124	1.94389	1.62937	6.0508	1.16322	0.837141
GeCo	15.4443	18.2241	1.97492	11.4437	10.3646	10.5882	14.1247	6.7021	8.33901	11.3872	19.6128	4.12319
STDEV	1.38064	4.37854	0.965125	3.73583	2.4091	1.50276	2.17924	2.33725	1.86107	0.874391	2.3154	0.409303
Student's t-test	p-value	0.417349	0.0264532	0.286157	0.317997	0.276213	0.231648	0.0217797	0.206451	0.250773	0.112432	1.3e-05
Figure 4-source data 4B
lin-53 RNAi mixed with control RNAi						lin-53 RNAi mixed with jmjd-1.2 RNAi
	none	GeCo+	GeCo	all animals (N)			none	GeCo+	GeCo	all animals (N)
Biol. Repl. 1	29	11	10	50		Biol. Repl. 1	22	1	1	24
Biol. Repl. 2	25	6	13	44		Biol. Repl. 2	190	4	43	237
Biol. Repl. 3	40	9	20	69		Biol. Repl. 3	6	1	0	7
Biol. Repl. 4	56	16	32	104
percentage	none	GeCo+	GeCo			percentage	none	GeCo+	GeCo
	0.58	0.22	0.2				0.916667	0.0416667	0.0416667
	0.568182	0.136364	0.295455				0.801688	0.0168776	0.181435
	0.57971	0.130435	0.289855				0.857143	0.142857	0
	0.538462	0.153846	0.307692				85.8499	6.71338	7.43671
	56.6588	16.0161	27.325				2.71064	3.14612	4.47998
	0.846209	1.78019	2.13901
lin-53 RNAi mixed with jmjd-2 RNAi						lin-53 RNAi mixed with jmjd-3.1 RNAi
	none	GeCo+	GeCo	all animals (N)		Biol. Repl. 1	none	GeCo+	GeCo	all animals (N)
Biol. Repl. 1	44	0	25	69		Biol. Repl. 2	2	0	1	3
Biol. Repl. 2	49	21	13	83		Biol. Repl. 3	89	4	47	140
Biol. Repl. 3	34	8	4	46		Biol. Repl. 4	88	13	21	122
							79	30	10	119
percentage	none	GeCo+	GeCo
	0.637681	0	0.362319			percentage	none	GeCo+	GeCo
	0.590361	0.253012	0.156627				0.666667	0	0.333333
	0.73913	0.173913	0.0869565				0.635714	0.0285714	0.335714
	65.5724	14.2308	20.1967				0.721311	0.106557	0.172131
	3.58305	6.10153	6.74915				0.663866	0.252101	0.0840336
							67.1889	9.68074	23.1303
							1.54977	4.88869	5.39105
lin-53 RNAi mixed with jmjd-3.2						lin-53 RNAi mixed with jmjd-3.3 RNAi
	none	GeCo+	GeCo	all animals (N)		Biol. Repl. 1	none	GeCo+	GeCo	all animals (N)
Biol. Repl. 1	3	0	1	4		Biol. Repl. 2	64	4	22	90
Biol. Repl. 2	64	4	22	90		Biol. Repl. 3	48	7	12	67
Biol. Repl. 3	36	11	17	64		Biol. Repl. 4	89	26	12	127
Biol. Repl. 4	70	29	29	128
Biol. Repl. 5	56	23	19	98
						percentage
percentage	none	GeCo+	GeCo				none	GeCo+	GeCo
	0.75	0	0.25				0.711111	0.0444444	0.244444
	0.711111	0.0444444	0.244444				0.716418	0.104478	0.179104
	0.5625	0.171875	0.265625				0.700787	0.204724	0.0944882
	0.546875	0.226562	0.226562
	0.571429	0.234694	0.193878				70.9439	11.7882	17.2679
	62.8383	13.5515	23.6102				0.374687	3.81726	3.54422
	3.78748	4.80137	1.22643
lin-53 RNAi mixed with utx-1							lin-53/eV	lin-53/utx-1	lin-53/jmjd-1.2	lin-53/jmjd-2	lin-53/jmjd-3.1	lin-53/jmjd-3.2	lin-53/jmjd-3.3
	none	GeCo+	GeCo	all animals (N)		none	56.6588	86.324	85.8499	65.5724	67.1889	62.8383	70.9439
Biol. Repl. 1	64	4	22	90		STDEV	0.846209	7.90265	2.71064	3.58305	1.54977	3.78748	0.374687
Biol. Repl. 2	48	7	12	67		GeCo+	16.0161	0.887574	6.71338	14.2308	9.68074	13.5515	11.7882
Biol. Repl. 3	89	26	12	127		STDEV	1.78019	0.62761	3.14612	6.10153	4.88869	4.80137	3.81726
						GeCo	27.325	12.7885	7.43671	20.1967	23.1303	23.6102	17.2679
percentage	none	GeCo+	GeCo			STDEV	2.13901	7.27504	4.47998	6.74915	5.39105	1.22643	3.54422
	0.711111	0.0444444	0.244444
	0.716418	0.104478	0.179104
	0.700787	0.204724	0.0944882
	70.9439	11.7882	17.2679

## Sheet: Figure 4-figure supplemnt 1A
RNAi: lin-53 + empty vector
none	GeCo+	GeCo
35	16	12	87	2016-08-11
29	7	9	45	2016-08-11
15	5	3	23	2016-08-12
9	3	1	13	2016-08-12
17	1	5	23	2016-08-12
105	32	30	191
none	>10	<10
0.402299	0.183908	0.137931
0.644444	0.155556	0.2
0.652174	0.217391	0.130435
0.692308	0.230769	0.0769231
0.73913	0.0434783	0.217391
62.6071	16.622	15.2536
5.22542	2.98511	2.26964
RNAi: utx-1 + empty vector
none	GeCo+	GeCo
23	0	1	24	2016-08-11
20	0	0	20	2016-08-11
24	0	0	24	2016-08-12
22	0	0	26	2016-08-12
24	0	1	25	2016-08-12
113	0	2	119
none	>10	<10
0.958333	0	0.0416667
1	0	0
1	0	0
0.846154	0	0
0.96	0	0.04
95.2897	0	1.63333
2.52282	0	0.894924
RNAi: lin-53 + utx-1
none	GeCo+	GeCo
9	0	2	11	2016-08-11
8	0	3	11	2016-08-11
22	0	3	25	2016-08-12
17	1	1	19	2016-08-12
11	1	1	13	2016-08-12
67	2	10	79
none	>10	<10
0.818182	0	0.181818
0.727273	0	0.272727
0.88	0	0.12
0.894737	0.0526316	0.0526316
0.846154	0.0769231	0.0769231
83.3269	2.59109	14.082
2.65262	1.46019	3.54253
Statistics
	lin-53 eV	utx-1 eV	utx-1 lin-53
none	62.6071	95.2897	83.3269
STDEV	5.22542	2.52282	2.65262
GeCo+	16.622	0	2.59109
STDEV	2.98511	0	1.46019
GeCo	15.2536	1.63333	14.082
STDEV	2.26964	0.894924	3.54253
