# Supplementary material for: Increasing Notch signaling antagonizes PRC2-mediated silencing to promote reprograming of germ cells into neurons
Source: eLife. 2016 Sep 7;5:e15477. doi: 10.7554/eLife.15477 (PMC5045294; doi:10.7554/eLife.15477)
Supplement: Supplementary file 1. — DOI: http://dx.doi.org/10.7554/eLife.15477.023 [file elife-15477-supp1.xlsx]

## Sheet: Sheet1
Supplementary file 1				color code	NotchON/OFF FC>2, mes/wt FC>1.5 (46)			strenght of the genetic interaction	1: weak effect
					NotchON/OFF FC>2, mes/wt FC=<1,23 (18)				3: strong effect
Public name	Chrom.	Notch ON/OFF fold change (log2)	mes-2/wt fold change (log2)	mes-6/wt fold change (log2)	av,mes/wt (log2)	Published RNAi phenotypes effecting germline, maternal or embryonic events	Possible off-target	Observed N2 phenotype	Suppressor of glp-1(gfts) Tumorous gonad phenotype at 20 °C (eggprep)	Suppressor of glp-1(gfts) Tumorous gonad phenotype at 25°C (eggprep)	Suppressor of glp-1(gfts) Tumorous gonad phenotype at 20°C (L1)	Enhancer of glp-1(gfts) Tumorous gonad phenotype at 20°C (L1)	Test for germ cell autonomy at 20°C (eggs laid over night)
OP50
Empty vector control
lag-1 (positive control)								Sterile, Protruded vulva		3	3		autonomous suppressor
acdh-7	X	1.02688	0.667797	0.93868	0.803239		and acdh-10
acl-1	X	1.22259	1.9054	1.15885	1.53212
aldo-1	III	1.73181	1.15534	1.97275	1.56404		T04D1.1
apa-2	X	1.22868	1.90059	1.8942	1.8974			Sick animals, Arrested		1		1
apm-3	X	2.1575	1.33458	0.580193	0.957388	Embryonic lethal, Sterile progeny (Simmer F et.al. 2003)				3		2	no effect
asb-2	X	1.34125	0.8424	1.03412	0.938261	Maternal sterile (Rual JF et.al. 2004), Sterile progeny		Larval arrest
B0416.5	X	2.91907	1.16095	0.903524	1.03224	Sterile progeny (Simmer F et.al. 2003)		Slow growth, Unfertilized eggs				2	soma-dep.enhancer
bath-13	II	1.20583	0.529597	0.212151	0.370874				3
C02B8.1	X	1.44072	0.271653	-0.199614	0.0360195		many others
C07G1.6	IV	4.10089	0.701829	0.87405	0.78794
C33C12.4	II	1.19091	0.462513	0.00299001	0.232752	Embryonic lethal (Simmer F et.al. 2003)						1
C55C3.3	IV	1.77573	1.93798	1.55715	1.74757	Embryonic lethal (Simmer F et.al. 2003)		Slow growth
cas-1	X	1.43222	0.726273	0.625866	0.67607				1
ceh-20	III	2.47734	2.25298	1.79249	2.02273	Embryonic lethal (Simmer F et.al. 2003)		Multivulva, Protruded vulva, Bag of worms, Small
coh-1	X	1.18266	1.4874	0.869612	1.1785	Embryonic lethal (Simmer F et.al. 2003)		Dumpy, Exploded through vulva
dpy-23	X	1.96136	0.953174	0.736035	0.844604	Larval lethal (Simmer F et.al. 2003)		Dumpy, Sick animals
epn-1	X	1.9041	0.513382	0.310969	0.412175	Embryonic lethal (Simmer F et.al. 2003), Germ line proliferation abnormal (Tian X et.al. 2004)				3	1	1	no effect
F08G12.2	X	2.2286	0.977834	0.669179	0.823506							1
F20D1.1	X	2.94443	1.54296	1.22086	1.38191
F31F6.3	X	1.54338	1.34527	1.48888	1.41707		C27C12.3		1
F35F11.2	IV	1.2046	0.472168	0.107264	0.289716
F36D3.1	V	1.48556	0.752118	0.879719	0.815918
F40D4.13	V	2.46944	-0.0017022	2.45356	1.22593				1
F40F8.3	II	1.19567	0.183411	-0.714623	-0.265606		F40F8.1		3				no effect
F47B10.1	X	2.26615	0.914487	0.726756	0.820622							2	autonomous enhancer
F54F7.6	X	1.50534	0.264663	-0.0522327	0.106215				1		3		no effect
F55A3.6	I	1.38788	2.4057	1.01565	1.71067					3			autonomous suppressor
F59D12.5	X	1.58871	1.36299	1.41377	1.38838
gas-1	X	2.21475	1.67045	1.45071	1.56058	Maternal sterile, embryonic lethal (Rual JF et.al. 2004)	nduf-2.2	Larval arrest (latest) L2, Sterile				3	too sick to score
gln-6	IV	1.44228	-0.0847611	0.0470426	-0.0188592	Embryonic lethal (Piano F et.al. 2002)
glrx-21	III	1.19482	-0.296969	-0.172431	-0.2347
gpd-2	X	1.34545	0.176599	0.364681	0.27064		ced-10
gpd-3	X	1.23755	0.112114	0.385369	0.248742		mig-2
ife-2	X	1.45681	0.827442	0.54492	0.686181		ife-1		1
K11H12.7	IV	1.24727	1.0276	0.613385	0.82049		K11H12.6
lin-15A	X	1.3518	1.7122	1.26347	1.48783		M02H5.8
lin-15B	X	1.42231	2.11454	1.65362	1.88408	Embryonic lethal, Larval arrest (Maeda I et.al. 2001)	T18D3.8
lnp-1	X	1.30584	1.68192	2.08228	1.8821				3				autonomous enhancer
lst-1	I	1.6837	-0.260384	-0.185314	-0.222849	Embryonic lethal, Reduced brood size (Rual JF et.al. 2004)				3	3		autonomous suppressor
lsy-2	X	1.50043	-0.300383	-0.793728	-0.547055	Sterile progeny (Simmer F et.al. 2003)		Protruded vulva
mbk-1	X	1.79908	1.01061	0.80723	0.908922						3	2	soma-dep.enhancer
mek-1	X	2.06209	0.535291	0.557348	0.546319
nhr-48	X	1.5546	1.85984	1.37693	1.61839		T18D3.7
nkat-3	X	2.39615	1.69757	1.67514	1.68636
pak-1	X	1.74249	2.18935	2.03937	2.11436				1
pmk-1	IV	1.55768	2.25991	1.76606	2.01299		pmk-2
pmk-2	IV	1.26921	2.90603	2.72918	2.8176				1
pmk-3	IV	1.32573	2.87898	3.40652	3.14275							2	no effect
puf-9	X	1.39528	0.759372	1.15204	0.955707	Clear (Kamath RS et.al. 2003)						3	autonomous enhancer
qdpr-1	III	1.23285	-0.246179	0.184003	-0.0310883					3			no effect
rpl-11.2	X	2.22479	1.97768	1.76306	1.87037	Maternal sterile (Piano F et.al. 2002; 2004; Sonnichsen B et.al. 2005)	rpl-11.1	Larval arrest (latest) L2
sft-4	X	1.28897	1.38739	1.30479	1.34609	Maternal sterile, Clear (Henricson A et.al. 2004), Clear, Sterile progeny (Kamath RS et.al. 2003)		L3 larval arrest, Exploded through vulva	1
spat-3	X	1.80982	1.27895	0.881465	1.08021
T10B10.3	X	1.92355	1.92574	1.17438	1.55006					1
T10D4.6	II	1.23455	1.57112	1.40842	1.48977							1
T27F6.4	I	3.60155	-0.390668	-0.0427943	-0.216731					3	3		clone did not grow
tag-123	X	1.73292	1.26133	0.914958	1.08814
tbc-1	X	1.74183	1.45957	1.37259	1.41608
tcl-2	IV	1.30132	-1.57332	-0.176325	-0.87482
ucr-2.1	X	1.29994	1.89099	1.54985	1.72042				1	3			no effect
utx-1	X	1.27077	1.53091	1.3547	1.44281	Embryonic lethal (Piano F et.al. 2002), Reduced brood size (Suzuki Y et.al. 2005)		Sterile, Protruded vulva, Dumpy
wht-9	III	1.30634	0.0572633	0.0124585	0.0348609		Y75B8A.32
ZC504.3	X	1.28015	1.19398	0.901567	1.04778
ZC84.3	III	2.55133	3.02059	1.82563	2.42311
