# Supplementary material for: Increasing Notch signaling antagonizes PRC2-mediated silencing to promote reprograming of germ cells into neurons
Source: eLife. 2016 Sep 7;5:e15477. doi: 10.7554/eLife.15477 (PMC5045294; doi:10.7554/eLife.15477)
Supplement: Supplementary file 2. — DOI: http://dx.doi.org/10.7554/eLife.15477.024 [file elife-15477-supp2.xlsx]

## Sheet: Sheet1
Supplementary file 2			weak gonadal signal	distal = signal in the mitotic zone at the distal end of the gonad
In situ hybidization patterns of Notch activated genes			strong gonadal signal	central = signal in the pachytene region
The Nematode Expression Pattern DataBase			distalmost	proximal = signal in the cellularizing oocites, in oocytes or in the spermatheaca
http://nematode.lab.nig.ac.jp/
Public name	Notch ON/OFF fold change (log2)	Chromosome	NEXTDB In-situ hybridization pattern in the adult gonad	NEXTDB link 1	NEXTDB link 2	NEXTDB link 3
C07G1.7	4.10089	IV	no data
T27F6.4	3.60155	I	distal + proximal	http://nematode.lab.nig.ac.jp/db2/ShowCloneInfo.php?clone=549a11	http://nematode.lab.nig.ac.jp/db2/ImageFull.php?clone=549a11&imgset=L990826-69-U&imgflag=s&imgfile=4-1.4.2
C07G1.6	3.02851	IV	no data
F20D1.1	2.94443	X	central + proximal	http://nematode.lab.nig.ac.jp/db2/ShowCloneInfo.php?clone=606b4
B0416.5	2.91907	X	signal troughout the gonad	http://nematode.lab.nig.ac.jp/db2/ShowCloneInfo.php?clone=112d8
ZC84.3	2.55133	III	no gonadal signal	http://nematode.lab.nig.ac.jp/db2/ShowCloneInfo.php?clone=181c5
ceh-20	2.47734	III	signal troughout the gonad	http://nematode.lab.nig.ac.jp/db2/ShowCloneInfo.php?clone=705d1
F40D4.13	2.46944	V	no data
nkat-3	2.39615	X	signal troughout the gonad	http://nematode.lab.nig.ac.jp/db2/ShowCloneInfo.php?clone=74a11
C55C3.7	2.28833	IV	no data
F47B10.1	2.26615	X	proximal	http://nematode.lab.nig.ac.jp/db2/ShowCloneInfo.php?clone=110d3
F08G12.2	2.2286	X	no gonadal signal	http://nematode.lab.nig.ac.jp/db2/ShowCloneInfo.php?clone=306e4
rpl-11.2	2.22479	X	distal + central	http://nematode.lab.nig.ac.jp/db2/ShowCloneInfo.php?clone=572a10
gas-1	2.21475	X	proximal	http://nematode.lab.nig.ac.jp/db2/ShowCloneInfo.php?clone=626b2	http://nematode.lab.nig.ac.jp/db2/ShowCloneInfo.php?clone=81b6
apm-3	2.1575	X	no data
mek-1	2.06209	X	proximal	http://nematode.lab.nig.ac.jp/db2/ShowCloneInfo.php?clone=507f1
C55C3.6	2.02272	IV	no data
dpy-23	1.96136	X	spermatheca	http://nematode.lab.nig.ac.jp/db2/ShowCloneInfo.php?clone=338g5
T10B10.3	1.92355	X	proximal	http://nematode.lab.nig.ac.jp/db2/ShowCloneInfo.php?clone=349a2
epn-1	1.9041	X	proximal	http://nematode.lab.nig.ac.jp/db2/ShowCloneInfo.php?clone=634h12	http://nematode.lab.nig.ac.jp/db2/ShowCloneInfo.php?clone=655e6	http://nematode.lab.nig.ac.jp/db2/ShowCloneInfo.php?clone=118f5
spat-3	1.80982	X	no data
mbk-1	1.79908	X	proximal	http://nematode.lab.nig.ac.jp/db2/ShowCloneInfo.php?clone=4e5
C55C3.3	1.77573	IV	no gonadal signal	http://nematode.lab.nig.ac.jp/db2/ShowCloneInfo.php?clone=792e10
Y37E11AR.3	1.75629	IV	spermatheca	http://nematode.lab.nig.ac.jp/db2/ShowCloneInfo.php?clone=576e2
pak-1	1.74249	X	signal troughout the gonad	http://nematode.lab.nig.ac.jp/db2/ShowCloneInfo.php?clone=115f12	http://nematode.lab.nig.ac.jp/db2/ShowCloneInfo.php?clone=116f6
tbc-1	1.74183	X	proximal	http://nematode.lab.nig.ac.jp/db2/ShowCloneInfo.php?clone=109d3
tag-123	1.73292	X	proximal	http://nematode.lab.nig.ac.jp/db2/ShowCloneInfo.php?clone=113d12
aldo-1	1.73181	III	signal troughout the gonad	http://nematode.lab.nig.ac.jp/db2/ShowCloneInfo.php?clone=553d4
F20D1.3	1.71199	X	proximal	http://nematode.lab.nig.ac.jp/db2/ShowCloneInfo.php?clone=57d9
lst-1	1.6837	I	proximal	http://nematode.lab.nig.ac.jp/db2/ShowCloneInfo.php?clone=608c4
ZK1320.11	1.67269	II	no gonadal signal	http://nematode.lab.nig.ac.jp/db2/ShowCloneInfo.php?clone=648h9
F59D12.5	1.58871	X	no data
pmk-1	1.55768	IV	very weak gonadal signal	http://nematode.lab.nig.ac.jp/db2/ShowCloneInfo.php?clone=1069g09
W03A5.2	1.55711	III	no data
nhr-48	1.5546	X	proximal	http://nematode.lab.nig.ac.jp/db2/ShowCloneInfo.php?clone=226g12	http://nematode.lab.nig.ac.jp/db2/ShowCloneInfo.php?clone=333f9
F31F6.3	1.54338	X	no data
T05C3.6	1.53143	V	very weak gonadal signal	http://nematode.lab.nig.ac.jp/db2/ShowCloneInfo.php?clone=723a11
F54F7.6	1.50534	X	no data
lsy-2	1.50043	X	signal troughout the gonad	http://nematode.lab.nig.ac.jp/db2/ShowCloneInfo.php?clone=663e12
F36D3.1	1.48556	V	signal troughout the gonad	http://nematode.lab.nig.ac.jp/db2/ShowCloneInfo.php?clone=625f4
ife-2	1.45681	X
F23B2.7	1.4486	IV	signal troughout the gonad	http://nematode.lab.nig.ac.jp/db2/ShowCloneInfo.php?clone=122c4
gln-6	1.44228	IV	central+proximal	http://nematode.lab.nig.ac.jp/db2/ShowCloneInfo.php?clone=82c9
C02B8.1	1.44072	X	no gonadal signal	http://nematode.lab.nig.ac.jp/db2/ShowCloneInfo.php?clone=511b4
T21C12.8	1.43355	III	no data
cas-1	1.43222	X	no data
lin-15B	1.42231	X	proximal	http://nematode.lab.nig.ac.jp/db2/ShowCloneInfo.php?clone=62g9	http://nematode.lab.nig.ac.jp/db2/ShowCloneInfo.php?clone=326f3
puf-9	1.39528	X	proximal	http://nematode.lab.nig.ac.jp/db2/ShowCloneInfo.php?clone=132f7
F55A3.6	1.38788	I	no data
Y53H1B.1	1.36614	I	distal + central	http://nematode.lab.nig.ac.jp/db2/ShowCloneInfo.php?clone=187h6
C46C2.2	1.35918	IV	no gonadal signal	http://nematode.lab.nig.ac.jp/db2/ShowCloneInfo.php?clone=55b7
Y34F4.5	1.35445	III	no gonadal signal	http://nematode.lab.nig.ac.jp/db2/ShowCloneInfo.php?clone=1105f03
Y54F10BM.3	1.35262	III	central + proximal	http://nematode.lab.nig.ac.jp/db2/ShowCloneInfo.php?clone=30g10
lin-15A	1.3518	X	signal troughout the gonad	http://nematode.lab.nig.ac.jp/db2/ShowCloneInfo.php?clone=117a4
gpd-2	1.34545	X	bad quality pictures	http://nematode.lab.nig.ac.jp/db2/ShowCloneInfo.php?clone=612f2
asb-2	1.34125	X	signal troughout the gonad	http://nematode.lab.nig.ac.jp/db2/ShowCloneInfo.php?clone=670b10
pmk-3	1.32573	IV	signal troughout the gonad	http://nematode.lab.nig.ac.jp/db2/ShowCloneInfo.php?clone=752f06
wht-9	1.30634	III	no data
lnp-1	1.30584	X	no gonadal signal	http://nematode.lab.nig.ac.jp/db2/ShowCloneInfo.php?clone=480c3
tcl-2	1.30132	IV	no gonadal signal	http://nematode.lab.nig.ac.jp/db2/ShowCloneInfo.php?clone=604f8
ucr-2.1	1.29994	X	signal troughout the gonad	http://nematode.lab.nig.ac.jp/db2/ShowCloneInfo.php?clone=89b12
sft-4	1.28897	X	proximal	http://nematode.lab.nig.ac.jp/db2/ShowCloneInfo.php?clone=345b11	http://nematode.lab.nig.ac.jp/db2/ShowCloneInfo.php?clone=485e10
ZC504.3	1.28015	X	signal troughout the gonad	http://nematode.lab.nig.ac.jp/db2/ShowCloneInfo.php?clone=74g7
pqn-65	1.27216	X	signal troughout the gonad	http://nematode.lab.nig.ac.jp/db2/ShowCloneInfo.php?clone=36c8
utx-1	1.27077	X	signal troughout the gonad	http://nematode.lab.nig.ac.jp/db2/ShowCloneInfo.php?clone=36f5
pmk-2	1.26921	IV	no gonadal signal	http://nematode.lab.nig.ac.jp/db2/ShowCloneInfo.php?clone=524d4
W07G9.2	1.26232	IV	no data
rme-6	1.25159	X	central + proximal	http://nematode.lab.nig.ac.jp/db2/ShowCloneInfo.php?clone=347g8
K11H12.7	1.24727	IV	no gonadal signal	http://nematode.lab.nig.ac.jp/db2/ShowCloneInfo.php?clone=918f1
gpd-3	1.23755	X	signal troughout the gonad	http://nematode.lab.nig.ac.jp/db2/ShowCloneInfo.php?clone=256g8
T10D4.6	1.23455	II	no gonadal signal	http://nematode.lab.nig.ac.jp/db2/ShowCloneInfo.php?clone=428e2
qdpr-1	1.23285	III	signal troughout the gonadn	http://nematode.lab.nig.ac.jp/db2/ImageFull.php?clone=591g12&imgset=L981207-46-U&imgflag=s&imgfile=4-1.2
apa-2	1.22868	X	proximal	http://nematode.lab.nig.ac.jp/db2/ShowCloneInfo.php?clone=1087g11
acl-1	1.22259	X	signal troughout the gonad	http://nematode.lab.nig.ac.jp/db2/ShowCloneInfo.php?clone=451h2
bath-13	1.20583	II	no data
F35F11.2	1.2046	IV	no data
T08G2.3	1.20135	X	no data
F40F8.3	1.19567	II	no data
glrx-21	1.19482	III	no data
C33C12.4	1.19091	II	no gonadal signal	http://nematode.lab.nig.ac.jp/db2/ShowCloneInfo.php?clone=717e4
coh-1	1.18266	X	proximal	http://nematode.lab.nig.ac.jp/db2/ShowCloneInfo.php?clone=471d11
R08E3.3	1.06516	X	proximal	http://nematode.lab.nig.ac.jp/db2/ShowCloneInfo.php?clone=1120f10	http://nematode.lab.nig.ac.jp/db2/ShowCloneInfo.php?clone=493e8
gpa-1	1.06957	V	no data
acdh-7	1.02688	X	proximal	http://nematode.lab.nig.ac.jp/db2/ShowCloneInfo.php?clone=114c1
